# Supplementary material for: Optic Nerve Lipidomics Reveal Impaired Glucosylsphingosine Lipids Pathway in Glaucoma
Source: PubMed Central journal article supplement (PMC6485987; doi:10.1167/iovs.18-25802), 2019-04
Supplement: iovs-60-05-34_s01.pdf [file iovs-60-05-34_s01.pdf]

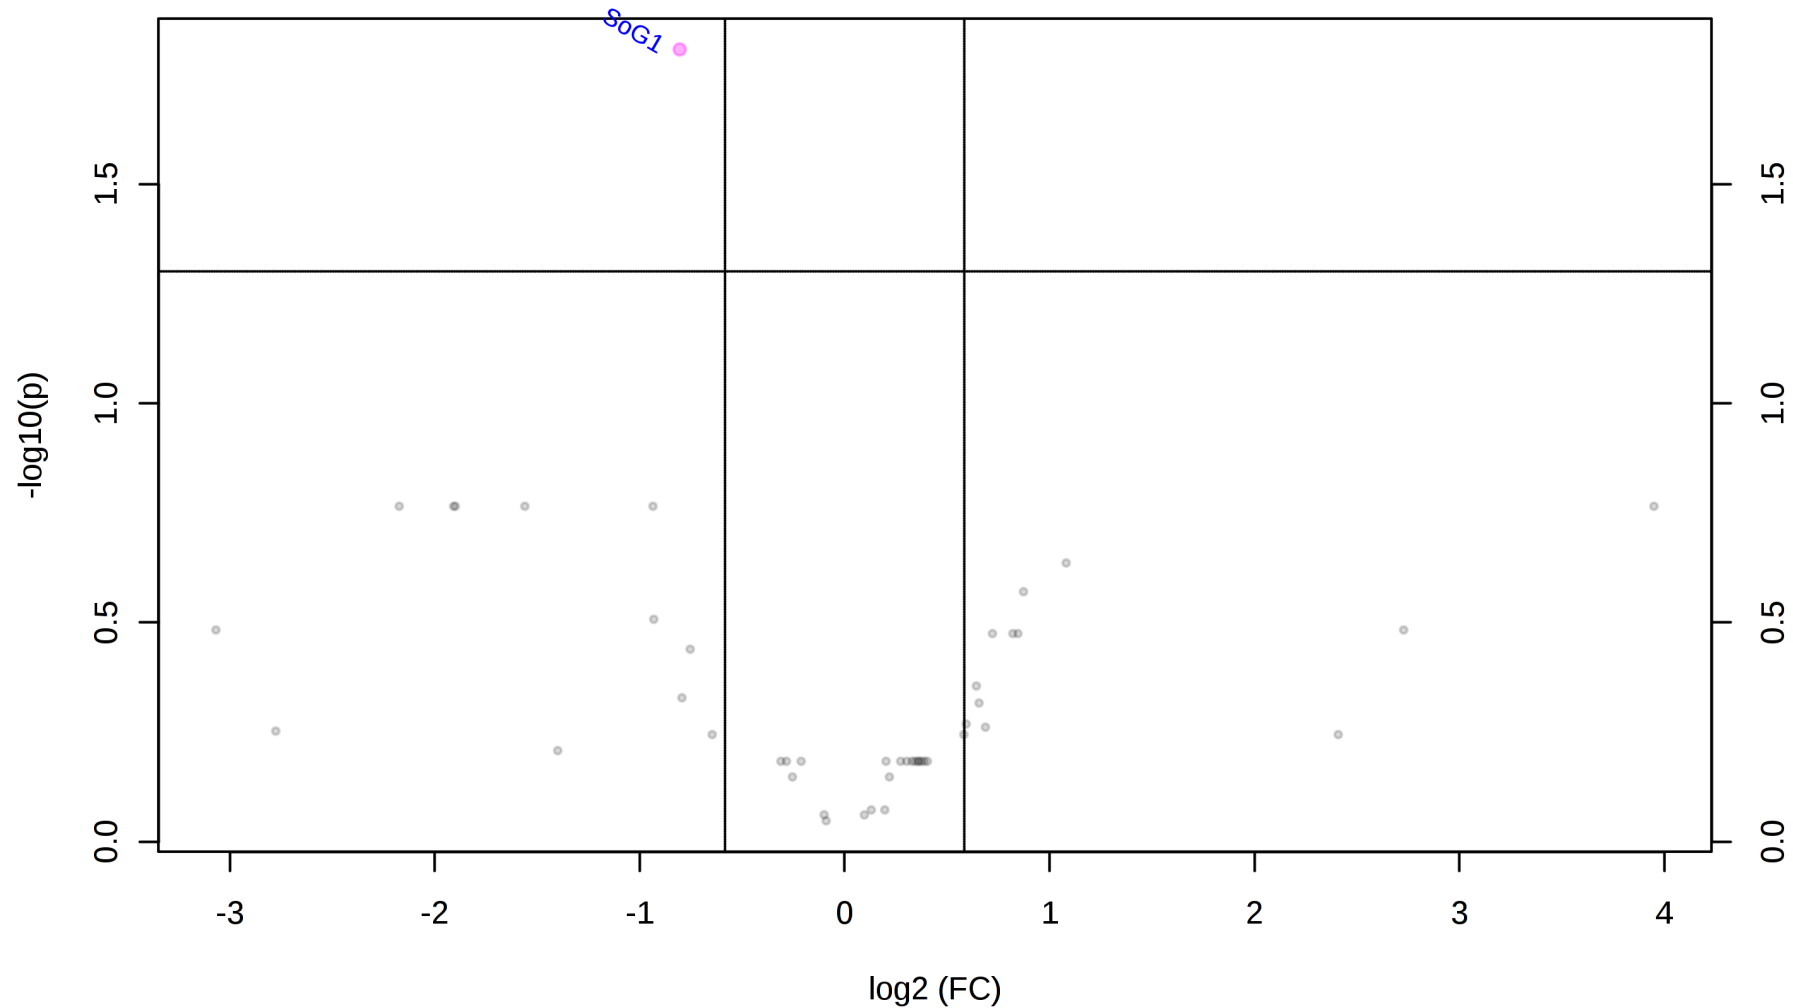

**Supplemental Fig 1. Volcano plot of lipid classes identified in control and glaucomatous ON.** When comparing lipid class profiles between two groups, a fold change (FC) threshold of 1.5 (x-axis) and an FDR-adjusted p-value ( $p$ ) was set at 0.05 (y-axis). The fold changes have been log2 transformed and  $p$ -values have been  $-\log_{10}$  transformed. Only one lipid class fell within those parameters and is highlighted in pink. SoG1 = glucosylsphingosine.

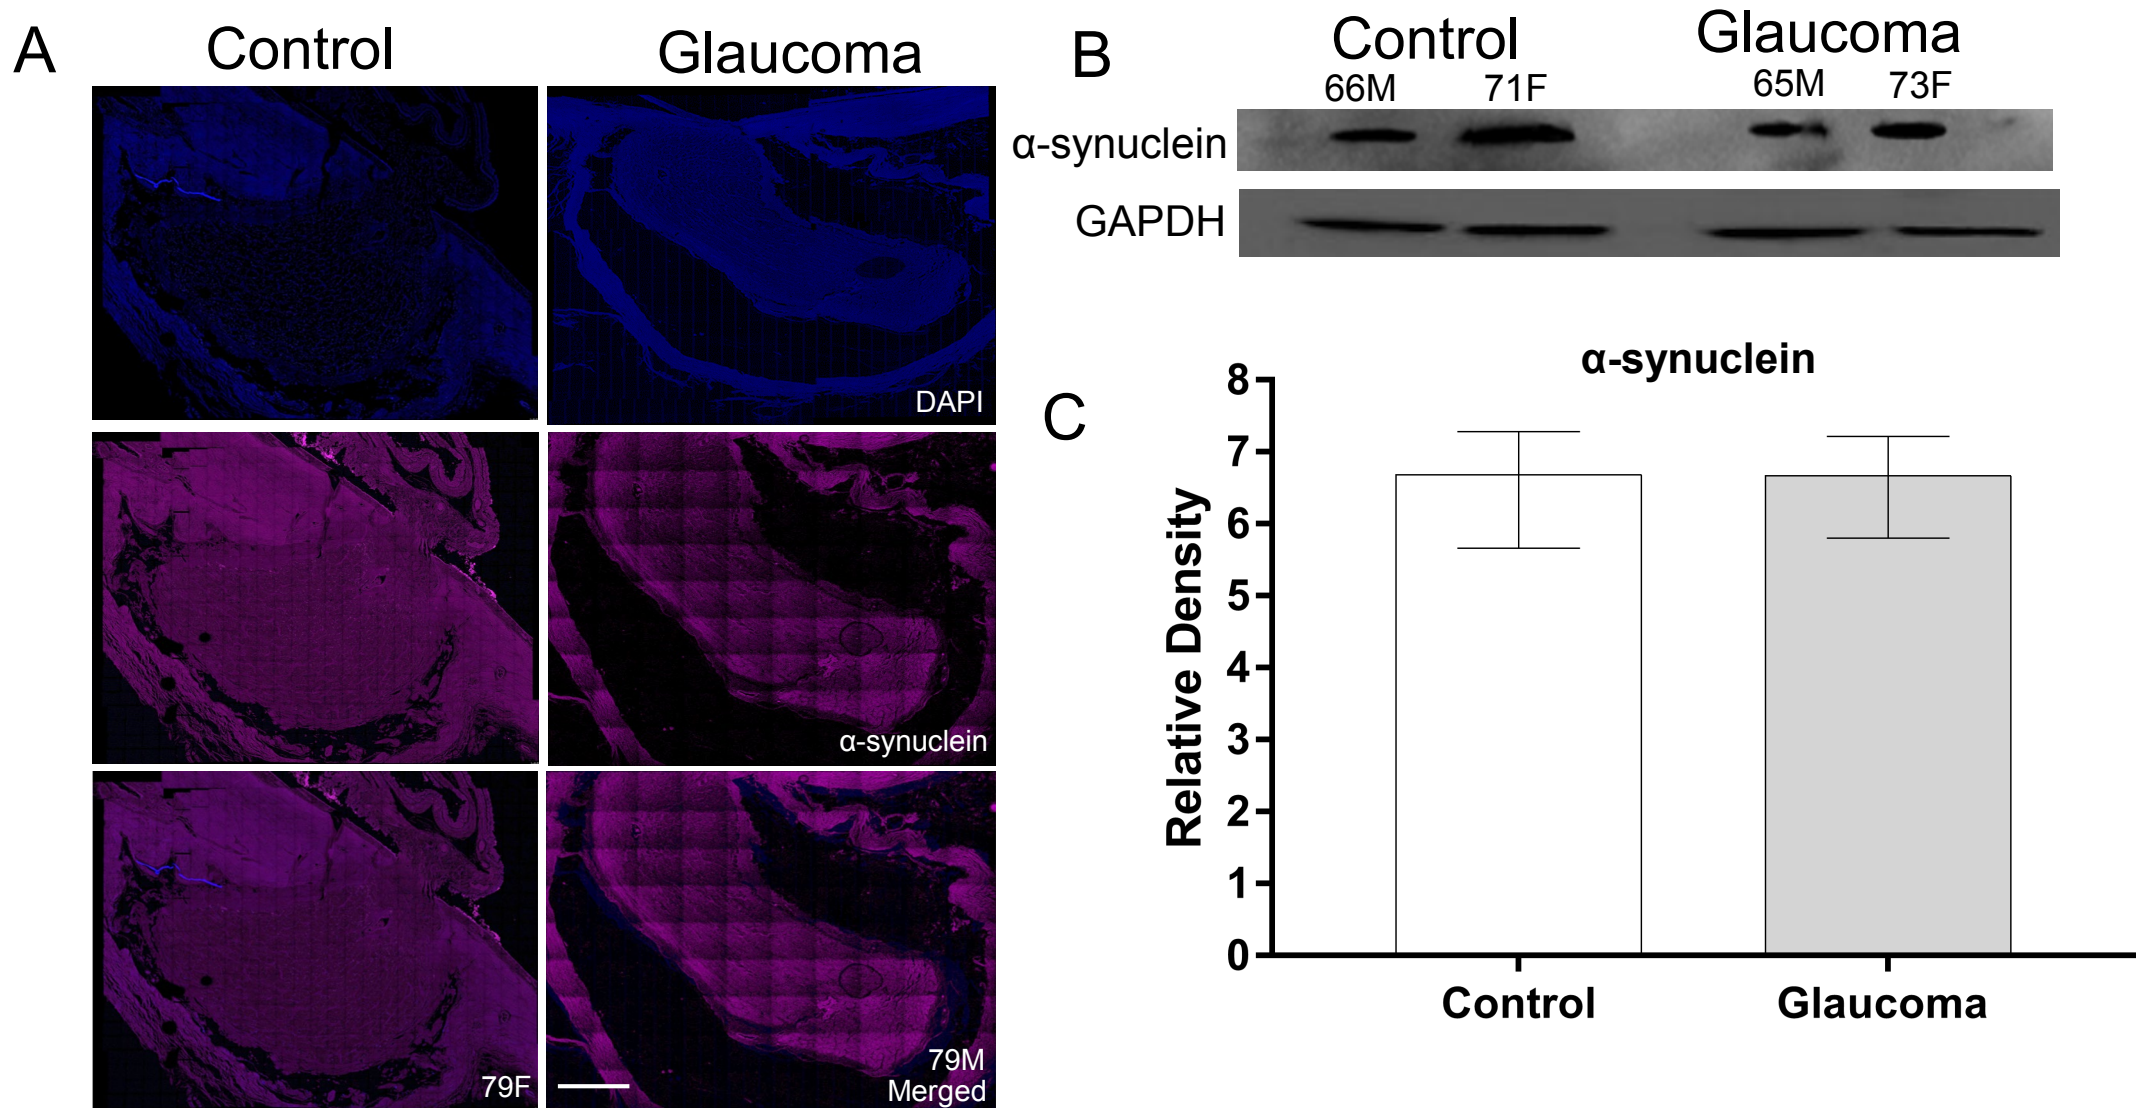

**Supplemental Fig 2. Representative immunohistochemistry and Western blot analysis of  $\alpha$ -synuclein protein.** Control and glaucomatous donor optic nerves (ON) were subjected to immunohistochemical and Western blot analysis. (A) ON sections (10 $\mu$ m) were treated with Anti- $\alpha$ -synuclein and subsequently probed with Alexa 594-conjugated donkey anti-sheep secondary antibody. DAPI (blue) nuclei stained images and merged images have been presented as indicated. Bar = 100  $\mu$ m. Age and gender are detailed on each merged image. (B) Proteins extracted from ON (20 $\mu$ g) were run on 4-15% gradient SDS-PAGE and probed with antibodies to  $\alpha$ -synuclein. 66M and 65M indicate 66 and 65 year-old males; 71F and 73F indicate 71 and 73 year-old females, respectively. (C) Densitometric quantification of  $\alpha$ -synuclein and GAPDH specific using ImageJ,  $\alpha$ -synuclein immunoreactivity levels were normalized to GAPDH values. Mean values  $\pm$  standard deviation are shown.

## Supplemental Table 1: Optic Nerve donors‡

### Donors used for Mass spectrometric lipidomics

#### *Control †*

| Sample Number | Age | Gender | Time interval* | Cause of Death | MD | PSD (dB) | IOP (mmHg) | Max known IOP (mm Hg) |
|---------------|-----|--------|----------------|----------------|----|----------|------------|-----------------------|
| 1N            | 78  | M      | 8              | Cardiac Arrest |    |          |            |                       |
| 2N            | 78  | M      | 9              | Cardiac Arrest |    |          |            |                       |
| 3N            | 69  | F      | 11             | Cardiac Arrest |    |          |            |                       |
| 4N            | 69  | M      | 12             | Not known      |    |          |            |                       |
| 5N            | 65  | M      | 14             | COPD           |    |          |            |                       |
| 6N            | 64  | M      | 10             | COPD           |    |          |            |                       |
| 7N            | 77  | F      | 12             | Cardiac Arrest |    |          |            |                       |
| 8N            | 78  | F      | 9              | Cardiac Arrest |    |          |            |                       |
| 9N            | 80  | F      | 10             | Trauma         |    |          |            |                       |
| 10N           | 68  | M      | 6              | COPD           |    |          |            |                       |
| 11N           | 70  | F      | 9              | Cardiac arrest |    |          |            |                       |

#### *Glaucoma*

|     |    |   |    |                         |           |      |    |    |
|-----|----|---|----|-------------------------|-----------|------|----|----|
| 1G  | 75 | M | 3  | Cardiac arrest          | -2.56 dB  | 2.54 | 14 | 22 |
| 2G  | 70 | M | 7  | Subarachnoid hemorrhage | -4.93 dB  | 3.23 | 15 | 21 |
| 3G  | 68 | M | 6  | Esophageal Cancer       | -13.72 dB | 9.52 | 17 | 27 |
| 4G  | 68 | M | 8  | Lung Cancer             | -6.44 dB  | 5.54 | 16 | 23 |
| 5G  | 69 | F | 19 | Myocardial Infarction   | -15.59 dB | 9.54 | 19 | 30 |
| 6G  | 52 | M | 10 | Not known               | -3.96 dB  | 3.72 | 17 | 24 |
| 7G  | 82 | F | 21 | COPD                    | -3.5 dB   | 2.52 | 14 | 22 |
| 8G  | 81 | F | 9  | Ovarian Cancer          | -6.9 dB   | 5.66 | 15 | 24 |
| 9G  | 79 | M | 19 | Myocardial Infarction   | -4.6 dB   | 3.96 | 16 | 22 |
| 10G | 65 | M | 11 | Not known               | -2.2 dB   | 2.22 | 14 | 22 |
| 11G | 83 | F | 10 | Not known               | -13.90 dB | 9.55 | 17 | 26 |
| 12G | 52 | M | 16 | Myocardial Infarction   | -6.55 dB  | 4.58 | 15 | 23 |

### Western and ELISA analysis

#### *Control*

|     |    |   |    |                |
|-----|----|---|----|----------------|
| 12N | 66 | M | 10 | Not known      |
| 13N | 71 | F | 9  | Cardiac Arrest |
| 1N  | 78 | M | 8  | Cardiac Arrest |
| 2N  | 78 | M | 9  | Cardiac Arrest |

|                 |    |   |    |                         |           |      |    |    |
|-----------------|----|---|----|-------------------------|-----------|------|----|----|
| 3N              | 69 | F | 11 | Cardiac Arrest          |           |      |    |    |
| 4N              | 69 | M | 12 | Not known               |           |      |    |    |
| <b>Glaucoma</b> |    |   |    |                         |           |      |    |    |
| 13G             | 65 | M | 8  | Myocardial Infarction   | -4.55 dB  | 3.33 | 16 | 23 |
| 14G             | 73 | F | 9  | Cancer                  | -6.66 dB  | 5.52 | 16 | 25 |
| 1G              | 75 | M | 3  | Cardiac arrest          | -2.56 dB  | 2.54 | 14 | 22 |
| 2G              | 70 | M | 7  | Subarachnoid hemorrhage | -4.93 dB  | 3.23 | 15 | 21 |
| 3G              | 68 | M | 6  | Esophageal Cancer       | -13.72 dB | 9.52 | 17 | 27 |
| 4G              | 68 | M | 8  | Lung Cancer             | -6.44 dB  | 5.54 | 16 | 23 |

### Representative Immunohistochemistry donors

|                 |    |   |    |                |          |      |    |    |
|-----------------|----|---|----|----------------|----------|------|----|----|
| <b>Control</b>  |    |   |    |                |          |      |    |    |
| 14N             | 48 | F | 21 | Cardiac Arrest |          |      |    |    |
| 15N             | 65 | F | 10 | Breast Cancer  |          |      |    |    |
| 16N             | 79 | M | 9  | Cardiac Arrest |          |      |    |    |
| <b>Glaucoma</b> |    |   |    |                |          |      |    |    |
| 15G             | 79 | F | 10 | Cardiac Arrest | -9.66 dB | 7.52 | 16 | 24 |

\*Time interval refers time from death to preservation. #Eyes were preserved in phosphate buffered saline upon enucleation, maintained at 2-8°C and transported. The glaucoma donors were selected to avoid those who had hyperlipidemia and/or were on statins. Shaded area are donors who are common between lipidomics and biochemical experiments.

□

**Supplemental Table 2: Common Phospholipid Species**

| Lipid Species✦ | FA         | Calc. Mass | Formula           |
|----------------|------------|------------|-------------------|
| PC(11:0/18:1)  | 11:0/18:1  | 689.4996   | C37 H72 O8 N1 P1  |
| PC(14:0p/18:1) | 14:0p/18:1 | 715.5516   | C40 H78 O7 N1 P1  |
| PC(14:0p/23:1) | 14:0p/23:1 | 785.6298   | C45 H88 O7 N1 P1  |
| PC(15:0/16:0)  | 15:0/16:0  | 719.5465   | C39 H78 O8 N1 P1  |
| PC(15:0/18:1)  | 15:0/18:1  | 745.5622   | C41 H80 O8 N1 P1  |
| PC(15:0/20:3)  | 15:0/20:3  | 769.5622   | C43 H80 O8 N1 P1  |
| PC(16:0/18:3)  | 16:0/18:3  | 755.5465   | C42 H78 O8 N1 P1  |
| PC(16:0/20:1)  | 16:0/20:1  | 787.6091   | C44 H86 O8 N1 P1  |
| PC(16:0/21:1)  | 16:0/21:1  | 801.6248   | C45 H88 O8 N1 P1  |
| PC(16:0/22:1)  | 16:0/22:1  | 815.6404   | C46 H90 O8 N1 P1  |
| PC(16:0/24:1)  | 16:0/24:1  | 843.6717   | C48 H94 O8 N1 P1  |
| PC(16:0p/14:0) | 16:0p/14:0 | 689.5359   | C38 H76 O7 N1 P1  |
| PC(16:0p/16:0) | 16:0p/16:0 | 717.5672   | C40 H80 O7 N1 P1  |
| PC(16:0p/18:1) | 16:0p/18:1 | 743.5829   | C42 H82 O7 N1 P1  |
| PC(16:0p/18:2) | 16:0p/18:2 | 741.5672   | C42 H80 O7 N1 P1  |
| PC(16:0p/20:4) | 16:0p/20:4 | 765.5672   | C44 H80 O7 N1 P1  |
| PC(16:0p/22:4) | 16:0p/22:4 | 793.5985   | C44 H80 O7 N1 P2  |
| PC(16:1)       | 16:01      | 507.2961   | C44 H80 O7 N1 P3  |
| PC(16:1/18:1)  | 16:1/18:1  | 757.5622   | C42 H80 O8 N1 P1  |
| PC(17:0/18:1)  | 17:0/18:1  | 773.5935   | C43 H84 O8 N1 P1  |
| PC(17:1/18:0)  | 17:1/18:0  | 773.5935   | C43 H84 O8 N1 P1  |
| PC(17:1/18:1)  | 17:1/18:1  | 771.5778   | C43 H82 O8 N1 P1  |
| PC(18:0/15:0)  | 18:0/15:0  | 747.5778   | C41 H82 O8 N1 P1  |
| PC(18:0p/16:0) | 18:0p/16:0 | 745.5985   | C42 H84 O7 N1 P1  |
| PC(18:0p/18:1) | 18:0p/18:1 | 771.6142   | C44 H86 O7 N1 P1  |
| PC(18:0p/20:1) | 18:0p/20:1 | 799.6455   | C46 H90 O7 N1 P1  |
| PC(18:1/13:0)  | 18:1/13:0  | 717.5309   | C39 H76 O8 N1 P1  |
| PC(18:2p/18:0) | 18:2p/18:0 | 769.5985   | C44 H84 O7 N1 P1  |
| PC(18:2p/18:1) | 18:2p/18:1 | 767.5829   | C44 H82 O7 N1 P1  |
| PC(18:3/18:2)  | 18:3/18:2  | 779.5465   | C44 H78 O8 N1 P1  |
| PC(19:4e)      | 19:4e      | 529.3168   | C27 H48 O7 N1 P1  |
| PC(20:0e/22:4) | 20:0e/22:4 | 851.6768   | C50 H94 O7 N1 P1  |
| PC(20:0p/16:0) | 20:0p/16:0 | 773.6298   | C44 H88 O7 N1 P1  |
| PC(21:0p)      | 21:0p      | 563.3951   | C29 H58 O7 N1 P1  |
| PC(21:2e)      | 21:2e      | 561.3794   | C29 H56 O7 N1 P1  |
| PC(22:0/18:2)  | 22:0/18:2  | 841.6561   | C48 H92 O8 N1 P1  |
| PC(22:4/13:0)  | 22:4/13:0  | 767.5465   | C43 H78 O8 N1 P1  |
| PC(24:0/18:2)  | 24:0/18:2  | 869.6874   | C50 H96 O8 N1 P1  |
| PC(24:2/18:2)  | 24:2/18:2  | 865.6561   | C50 H92 O8 N1 P1  |
| PC(25:0e)      | 25:0e      | 621.4733   | C33 H68 O7 N1 P1  |
| PC(25:0p)      | 25:0p      | 619.4577   | C33 H66 O7 N1 P1  |
| PC(25:1/16:0)  | 25:1/16:0  | 857.6874   | C49 H96 O8 N1 P1  |
| PC(25:1/16:1)  | 25:1/16:1  | 855.6717   | C49 H94 O8 N1 P1  |
| PC(26:0/16:0)  | 26:0/16:0  | 873.7187   | C50 H100 O8 N1 P1 |

|               |           |          |                   |
|---------------|-----------|----------|-------------------|
| PC(26:1/15:0) | 26:1/15:0 | 857.6874 | C49 H96 O8 N1 P1  |
| PC(26:1/16:0) | 26:1/16:0 | 871.703  | C50 H98 O8 N1 P1  |
| PC(26:1/17:1) | 26:1/17:1 | 883.703  | C51 H98 O8 N1 P1  |
| PC(26:1/18:2) | 26:1/18:2 | 895.703  | C52 H98 O8 N1 P1  |
| PC(26:1/19:1) | 26:1/19:1 | 911.7343 | C53 H102 O8 N1 P1 |
| PC(27:0/16:0) | 27:0/16:0 | 887.7343 | C51 H102 O8 N1 P1 |
| PC(27:0e)     | 27:0e     | 649.5046 | C35 H72 O7 N1 P1  |
| PC(27:0p)     | 27:0p     | 647.489  | C35 H70 O7 N1 P1  |
| PC(27:1/16:0) | 27:1/16:0 | 885.7187 | C51 H100 O8 N1 P1 |
| PC(27:1/17:1) | 27:1/17:1 | 897.7187 | C52 H100 O8 N1 P1 |
| PC(28:0)      | 28:00:00  | 677.4996 | C36 H72 O8 N1 P1  |
| PC(28:1/10:3) | 28:1/10:3 | 809.5935 | C46 H84 O8 N1 P1  |
| PC(28:1/16:0) | 28:1/16:0 | 899.7343 | C52 H102 O8 N1 P1 |
| PC(28:1/16:1) | 28:1/16:1 | 897.7187 | C52 H100 O8 N1 P1 |
| PC(28:1/19:1) | 28:1/19:1 | 939.7656 | C55 H106 O8 N1 P1 |
| PC(28:1/20:0) | 28:1/20:0 | 955.7969 | C56 H110 O8 N1 P1 |
| PC(28:2e)     | 28:2e     | 659.489  | C36 H70 O7 N1 P1  |
| PC(28:2p)     | 28:2p     | 657.4733 | C36 H68 O7 N1 P1  |
| PC(29:0)      | 29:00:00  | 691.5152 | C37 H74 O8 N1 P1  |
| PC(29:0p)     | 29:0p     | 675.5203 | C37 H74 O7 N1 P1  |
| PC(29:1/16:0) | 29:1/16:0 | 913.75   | C53 H104 O8 N1 P1 |
| PC(29:7)      | 29:07:00  | 677.4057 | C37 H60 O8 N1 P1  |
| PC(30:0)      | 30:00:00  | 705.5309 | C38 H76 O8 N1 P1  |
| PC(30:0e)     | 30:0e     | 691.5516 | C38 H78 O7 N1 P1  |
| PC(30:1)      | 30:01:00  | 703.5152 | C38 H74 O8 N1 P1  |
| PC(30:1/16:0) | 30:1/16:0 | 927.7656 | C54 H106 O8 N1 P1 |
| PC(30:2e)     | 30:2e     | 687.5203 | C38 H74 O7 N1 P1  |
| PC(31:0e)     | 31:0e     | 705.5672 | C39 H80 O7 N1 P1  |
| PC(31:0p)     | 31:0p     | 703.5516 | C39 H78 O7 N1 P1  |
| PC(31:1)      | 31:01:00  | 717.5309 | C39 H76 O8 N1 P1  |
| PC(31:1/16:0) | 31:1/16:0 | 941.7813 | C55 H108 O8 N1 P1 |
| PC(31:2)      | 31:02:00  | 715.5152 | C39 H74 O8 N1 P1  |
| PC(31:2p)     | 31:2p     | 699.5203 | C39 H74 O7 N1 P1  |
| PC(31:8)      | 31:08:00  | 703.4213 | C39 H62 O8 N1 P1  |
| PC(32:0)      | 32:00:00  | 733.5622 | C40 H80 O8 N1 P1  |
| PC(32:0e)     | 32:0e     | 719.5829 | C40 H82 O7 N1 P1  |
| PC(32:1)      | 32:01:00  | 731.5465 | C40 H78 O8 N1 P1  |
| PC(32:1/18:1) | 32:1/18:1 | 981.8126 | C58 H112 O8 N1 P1 |
| PC(32:2)      | 32:02:00  | 729.5309 | C40 H76 O8 N1 P1  |
| PC(32:3)      | 32:03:00  | 727.5152 | C40 H74 O8 N1 P1  |
| PC(32:6p)     | 32:6p     | 705.4733 | C40 H68 O7 N1 P1  |
| PC(33:0)      | 33:00:00  | 747.5778 | C41 H82 O8 N1 P1  |
| PC(33:1)      | 33:01:00  | 745.5622 | C41 H80 O8 N1 P1  |
| PC(33:2)      | 33:02:00  | 743.5465 | C41 H78 O8 N1 P1  |
| PC(33:3)      | 33:03:00  | 741.5309 | C41 H76 O8 N1 P1  |
| PC(34:0)      | 34:00:00  | 761.5935 | C42 H84 O8 N1 P1  |
| PC(34:0/11:1) | 34:0/11:1 | 913.75   | C53 H104 O8 N1 P1 |
| PC(34:0e)     | 34:0e     | 747.6142 | C42 H86 O7 N1 P1  |

|               |           |           |                   |
|---------------|-----------|-----------|-------------------|
| PC(34:1)      | 34:01:00  | 759.5778  | C42 H82 O8 N1 P1  |
| PC(34:1/12:3) | 34:1/12:3 | 921.7187  | C54 H100 O8 N1 P1 |
| PC(34:1/12:4) | 34:1/12:4 | 919.703   | C54 H98 O8 N1 P1  |
| PC(34:1/18:1) | 34:1/18:1 | 1009.8439 | C60 H116 O8 N1 P1 |
| PC(34:2)      | 34:02:00  | 757.5622  | C42 H80 O8 N1 P1  |
| PC(34:3)      | 34:03:00  | 755.5465  | C42 H78 O8 N1 P1  |
| PC(34:4)      | 34:04:00  | 753.5309  | C42 H76 O8 N1 P1  |
| PC(35:0p)     | 35:0p     | 759.6142  | C43 H86 O7 N1 P1  |
| PC(35:1p)     | 35:1p     | 757.5985  | C43 H84 O7 N1 P1  |
| PC(35:2p)     | 35:2p     | 755.5829  | C43 H82 O7 N1 P1  |
| PC(35:3)      | 35:03:00  | 769.5622  | C43 H80 O8 N1 P1  |
| PC(35:4)      | 35:04:00  | 767.5465  | C43 H78 O8 N1 P1  |
| PC(35:5)      | 35:05:00  | 765.5309  | C43 H76 O8 N1 P1  |
| PC(36:0)      | 36:00:00  | 789.6248  | C44 H88 O8 N1 P1  |
| PC(36:1/11:1) | 36:1/11:1 | 939.7656  | C55 H106 O8 N1 P1 |
| PC(36:1/12:3) | 36:1/12:3 | 949.75    | C56 H104 O8 N1 P1 |
| PC(36:1/12:4) | 36:1/12:4 | 947.7343  | C56 H102 O8 N1 P1 |
| PC(36:2)      | 36:02:00  | 785.5935  | C44 H84 O8 N1 P1  |
| PC(36:3)      | 36:03:00  | 783.5778  | C44 H82 O8 N1 P1  |
| PC(36:4e)     | 36:4e     | 767.5829  | C44 H82 O7 N1 P1  |
| PC(36:5p)     | 36:5p     | 763.5516  | C44 H78 O7 N1 P1  |
| PC(37:0p)     | 37:0p     | 787.6455  | C45 H90 O7 N1 P1  |
| PC(37:1)      | 37:01:00  | 801.6248  | C45 H88 O8 N1 P1  |
| PC(37:2)      | 37:02:00  | 799.6091  | C45 H86 O8 N1 P1  |
| PC(37:2p)     | 37:2p     | 783.6142  | C45 H86 O7 N1 P1  |
| PC(37:3)      | 37:03:00  | 797.5935  | C45 H84 O8 N1 P1  |
| PC(37:4)      | 37:04:00  | 795.5778  | C45 H82 O8 N1 P1  |
| PC(37:6)      | 37:06:00  | 791.5465  | C45 H78 O8 N1 P1  |
| PC(38:0)      | 38:00:00  | 817.6561  | C46 H92 O8 N1 P1  |
| PC(38:0e)     | 38:0e     | 803.6768  | C46 H94 O7 N1 P1  |
| PC(38:1e)     | 38:1e     | 801.6611  | C46 H92 O7 N1 P1  |
| PC(38:2)      | 38:02:00  | 813.6248  | C46 H88 O8 N1 P1  |
| PC(38:2e)     | 38:2e     | 799.6455  | C46 H90 O7 N1 P1  |
| PC(38:3)      | 38:03:00  | 811.6091  | C46 H86 O8 N1 P1  |
| PC(38:3e)     | 38:3e     | 797.6298  | C46 H88 O7 N1 P1  |
| PC(38:4e)     | 38:4e     | 795.6142  | C46 H86 O7 N1 P1  |
| PC(38:5)      | 38:05:00  | 807.5778  | C46 H82 O8 N1 P1  |
| PC(38:6e)     | 38:6e     | 791.5829  | C46 H82 O7 N1 P1  |
| PC(38:8)      | 38:08:00  | 801.5309  | C46 H76 O8 N1 P1  |
| PC(39:0p)     | 39:0p     | 815.6768  | C47 H94 O7 N1 P1  |
| PC(39:1)      | 39:01:00  | 829.6561  | C47 H92 O8 N1 P1  |
| PC(39:3)      | 39:03:00  | 825.6248  | C47 H88 O8 N1 P1  |
| PC(39:4)      | 39:04:00  | 823.6091  | C47 H86 O8 N1 P1  |
| PC(39:6)      | 39:06:00  | 819.5778  | C47 H82 O8 N1 P1  |
| PC(40:0)      | 40:00:00  | 845.6874  | C48 H96 O8 N1 P1  |
| PC(40:0e)     | 40:0e     | 831.7081  | C48 H98 O7 N1 P1  |
| PC(40:1e)     | 40:1e     | 829.6924  | C48 H96 O7 N1 P1  |
| PC(40:2e)     | 40:2e     | 827.6768  | C48 H94 O7 N1 P1  |

|           |          |          |                   |
|-----------|----------|----------|-------------------|
| PC(40:2p) | 40:2p    | 825.6611 | C48 H92 O7 N1 P1  |
| PC(40:3)  | 40:03:00 | 839.6404 | C48 H90 O8 N1 P1  |
| PC(40:3p) | 40:3p    | 823.6455 | C48 H90 O7 N1 P1  |
| PC(40:4)  | 40:04:00 | 837.6248 | C48 H88 O8 N1 P1  |
| PC(40:5)  | 40:05:00 | 835.6091 | C48 H86 O8 N1 P1  |
| PC(40:5e) | 40:5e    | 821.6298 | C48 H88 O7 N1 P1  |
| PC(40:6)  | 40:06:00 | 833.5935 | C48 H84 O8 N1 P1  |
| PC(40:7)  | 40:07:00 | 831.5778 | C48 H82 O8 N1 P1  |
| PC(40:8)  | 40:08:00 | 829.5622 | C48 H80 O8 N1 P1  |
| PC(40:8p) | 40:8p    | 813.5672 | C48 H80 O7 N1 P1  |
| PC(41:0)  | 41:00:00 | 859.703  | C49 H98 O8 N1 P1  |
| PC(41:1p) | 41:1p    | 841.6924 | C49 H96 O7 N1 P1  |
| PC(41:2)  | 41:02:00 | 855.6717 | C49 H94 O8 N1 P1  |
| PC(42:0)  | 42:00:00 | 873.7187 | C50 H100 O8 N1 P1 |
| PC(42:0e) | 42:0e    | 859.7394 | C50 H102 O7 N1 P1 |
| PC(42:2e) | 42:2e    | 855.7081 | C50 H98 O7 N1 P1  |
| PC(42:2p) | 42:2p    | 853.6924 | C50 H96 O7 N1 P1  |
| PC(42:3)  | 42:03:00 | 867.6717 | C50 H94 O8 N1 P1  |
| PC(42:4)  | 42:04:00 | 865.6561 | C50 H92 O8 N1 P1  |
| PC(42:4p) | 42:4p    | 849.6611 | C50 H92 O7 N1 P1  |
| PC(42:5)  | 42:05:00 | 863.6404 | C50 H90 O8 N1 P1  |
| PC(42:6e) | 42:6e    | 847.6455 | C50 H90 O7 N1 P1  |
| PC(43:3)  | 43:03:00 | 881.6874 | C51 H96 O8 N1 P1  |
| PC(44:0)  | 44:00:00 | 901.75   | C52 H104 O8 N1 P1 |
| PC(44:2e) | 44:2e    | 883.7394 | C52 H102 O7 N1 P1 |
| PC(44:2p) | 44:2p    | 881.7237 | C52 H100 O7 N1 P1 |
| PC(44:4)  | 44:04:00 | 893.6874 | C52 H96 O8 N1 P1  |
| PC(44:5)  | 44:05:00 | 891.6717 | C52 H94 O8 N1 P1  |
| PC(45:0)  | 45:00:00 | 915.7656 | C53 H106 O8 N1 P1 |
| PC(45:3)  | 45:03:00 | 909.7187 | C53 H100 O8 N1 P1 |
| PC(45:4)  | 45:04:00 | 907.703  | C53 H98 O8 N1 P1  |
| PC(45:5)  | 45:05:00 | 905.6874 | C53 H96 O8 N1 P1  |
| PC(46:0)  | 46:00:00 | 929.7813 | C54 H108 O8 N1 P1 |
| PC(46:2)  | 46:02:00 | 925.75   | C54 H104 O8 N1 P1 |
| PC(46:3)  | 46:03:00 | 923.7343 | C54 H102 O8 N1 P1 |
| PC(46:4)  | 46:04:00 | 921.7187 | C54 H100 O8 N1 P1 |
| PC(46:6)  | 46:06:00 | 917.6874 | C54 H96 O8 N1 P1  |
| PC(47:3)  | 47:03:00 | 937.75   | C55 H104 O8 N1 P1 |
| PC(47:4)  | 47:04:00 | 935.7343 | C55 H102 O8 N1 P1 |
| PC(47:5)  | 47:05:00 | 933.7187 | C55 H100 O8 N1 P1 |
| PC(47:6)  | 47:06:00 | 931.703  | C55 H98 O8 N1 P1  |
| PC(48:1)  | 48:01:00 | 955.7969 | C56 H110 O8 N1 P1 |
| PC(48:2)  | 48:02:00 | 953.7813 | C56 H108 O8 N1 P1 |
| PC(48:3)  | 48:03:00 | 951.7656 | C56 H106 O8 N1 P1 |
| PC(48:4)  | 48:04:00 | 949.75   | C56 H104 O8 N1 P1 |
| PC(48:6)  | 48:06:00 | 945.7187 | C56 H100 O8 N1 P1 |
| PC(49:2)  | 49:02:00 | 967.7969 | C57 H110 O8 N1 P1 |
| PC(49:5)  | 49:05:00 | 961.75   | C57 H104 O8 N1 P1 |



|                |            |           |                   |
|----------------|------------|-----------|-------------------|
| PC(50:2)       | 50:02:00   | 981.8126  | C58 H112 O8 N1 P1 |
| PC(50:3)       | 50:03:00   | 979.7969  | C58 H110 O8 N1 P1 |
| PC(50:4)       | 50:04:00   | 977.7813  | C58 H108 O8 N1 P1 |
| PC(50:5)       | 50:05:00   | 975.7656  | C58 H106 O8 N1 P1 |
| PC(51:2)       | 51:02:00   | 995.8282  | C59 H114 O8 N1 P1 |
| PC(52:2)       | 52:02:00   | 1009.8439 | C60 H116 O8 N1 P1 |
| PC(52:3)       | 52:03:00   | 1007.8282 | C60 H114 O8 N1 P1 |
| PC(52:5)       | 52:05:00   | 1003.7969 | C60 H110 O8 N1 P1 |
| PC(52:6)       | 52:06:00   | 1001.7813 | C60 H108 O8 N1 P1 |
| PC(52:7)       | 52:07:00   | 999.7656  | C60 H106 O8 N1 P1 |
| PC(53:1)       | 53:01:00   | 1025.8752 | C61 H120 O8 N1 P1 |
| PC(54:2)       | 54:02:00   | 1037.8752 | C62 H120 O8 N1 P1 |
| PC(54:5)       | 54:05:00   | 1031.8282 | C62 H114 O8 N1 P1 |
| PC(54:6)       | 54:06:00   | 1029.8126 | C62 H112 O8 N1 P1 |
| PC(54:7)       | 54:07:00   | 1027.7969 | C62 H110 O8 N1 P1 |
| PC(56:5)       | 56:05:00   | 1059.8595 | C64 H118 O8 N1 P1 |
| PC(58:4)       | 58:04:00   | 1089.9065 | C66 H124 O8 N1 P1 |
| PC(58:5)       | 58:05:00   | 1087.8908 | C66 H122 O8 N1 P1 |
| PC(58:6)       | 58:06:00   | 1085.8752 | C66 H120 O8 N1 P1 |
| PC(60:6)       | 60:06:00   | 1113.9065 | C68 H124 O8 N1 P1 |
| PC(8:0e/18:1)  | 8:0e/18:1  | 633.4733  | C34 H68 O7 N1 P1  |
| PC(16:0/22:4)  | 16:0/22:4  | 809.5935  | C46 H84 O8 N1 P1  |
| PC(20:1p/16:0) | 20:1p/16:0 | 771.6142  | C44 H86 O7 N1 P1  |
| PC(16:0/16:0)  | 16:0/16:0  | 733.5622  | C40 H80 O8 N1 P1  |
| PC(18:1/18:3)  | 18:1/18:3  | 781.5622  | C44 H80 O8 N1 P1  |
| PC(28:1/17:1)  | 28:1/17:1  | 911.7343  | C53 H102 O8 N1 P1 |
| PC(28:1/18:1)  | 28:1/18:1  | 925.75    | C54 H104 O8 N1 P1 |
| PC(30:1e)      | 30:1e      | 689.5359  | C38 H76 O7 N1 P1  |
| PC(31:0)       | 31:00:00   | 719.5465  | C39 H78 O8 N1 P1  |
| PC(32:1p)      | 32:1p      | 715.5516  | C40 H78 O7 N1 P1  |
| PC(34:2p)      | 34:2p      | 741.5672  | C42 H80 O7 N1 P1  |
| PC(36:1)       | 36:01:00   | 787.6091  | C44 H86 O8 N1 P1  |
| PC(36:1e)      | 36:1e      | 773.6298  | C44 H88 O7 N1 P1  |
| PC(36:4)       | 36:04:00   | 781.5622  | C44 H80 O8 N1 P1  |
| PC(36:4p)      | 36:4p      | 765.5672  | C44 H80 O7 N1 P1  |
| PC(36:5)       | 36:05:00   | 779.5465  | C44 H78 O8 N1 P1  |
| PC(38:1)       | 38:01:00   | 815.6404  | C46 H90 O8 N1 P1  |
| PC(38:4p)      | 38:4p      | 793.5985  | C46 H84 O7 N1 P1  |
| PC(38:6)       | 38:06:00   | 805.5622  | C46 H80 O8 N1 P1  |
| PC(40:1)       | 40:01:00   | 843.6717  | C48 H94 O8 N1 P1  |
| PC(40:2)       | 40:02:00   | 841.6561  | C48 H92 O8 N1 P1  |
| PC(40:7p)      | 40:7p      | 815.5829  | C48 H82 O7 N1 P1  |
| PC(42:2)       | 42:02:00   | 869.6874  | C50 H96 O8 N1 P1  |
| PC(44:3)       | 44:03:00   | 895.703   | C52 H98 O8 N1 P1  |
| PC(46:5)       | 46:05:00   | 919.703   | C54 H98 O8 N1 P1  |
| PC(48:5)       | 48:05:00   | 947.7343  | C56 H102 O8 N1 P1 |
| PC(50:6)       | 50:06:00   | 973.75    | C58 H104 O8 N1 P1 |
| PC(26:2e)      | 26:2e      | 631.4577  | C34 H66 O7 N1 P1  |

|                |            |          |                  |
|----------------|------------|----------|------------------|
| PC(37:1p)      | 37:1p      | 785.6298 | C45 H88 O7 N1 P1 |
| PC(39:2p)      | 39:2p      | 811.6455 | C47 H90 O7 N1 P1 |
| PE(15:1)       | 15:01      | 451.2335 | C20 H38 O8 N1 P1 |
| PE(16:0/18:1)  | 16:0/18:1  | 717.5309 | C39 H76 O8 N1 P1 |
| PE(16:0/18:2)  | 16:0/18:2  | 715.5152 | C39 H74 O8 N1 P1 |
| PE(16:0/20:4)  | 16:0/20:4  | 739.5152 | C41 H74 O8 N1 P1 |
| PE(16:0/22:6)  | 16:0/22:6  | 763.5152 | C43 H74 O8 N1 P1 |
| PE(16:0p/16:0) | 16:0p/16:0 | 675.5203 | C37 H74 O7 N1 P1 |
| PE(16:0p/18:1) | 16:0p/18:1 | 701.5359 | C39 H76 O7 N1 P1 |
| PE(16:0p/19:1) | 16:0p/19:1 | 715.5516 | C40 H78 O7 N1 P1 |
| PE(16:0p/20:1) | 16:0p/20:1 | 729.5672 | C41 H80 O7 N1 P1 |
| PE(16:0p/20:3) | 16:0p/20:3 | 725.5359 | C41 H76 O7 N1 P1 |
| PE(16:0p/20:4) | 16:0p/20:4 | 723.5203 | C41 H74 O7 N1 P1 |
| PE(16:0p/22:3) | 16:0p/22:3 | 753.5672 | C43 H80 O7 N1 P1 |
| PE(16:0p/22:4) | 16:0p/22:4 | 751.5516 | C43 H78 O7 N1 P1 |
| PE(16:0p/22:6) | 16:0p/22:6 | 747.5203 | C43 H74 O7 N1 P1 |
| PE(16:1/18:1)  | 16:1/18:1  | 715.5152 | C39 H74 O8 N1 P1 |
| PE(18:0/18:1)  | 18:0/18:1  | 745.5622 | C41 H80 O8 N1 P1 |
| PE(18:0/20:1)  | 18:0/20:1  | 773.5935 | C43 H84 O8 N1 P1 |
| PE(18:0/20:4)  | 18:0/20:4  | 767.5465 | C43 H78 O8 N1 P1 |
| PE(18:0/22:2)  | 18:0/22:2  | 799.6091 | C45 H86 O8 N1 P1 |
| PE(18:0/22:3)  | 18:0/22:3  | 797.5935 | C45 H84 O8 N1 P1 |
| PE(18:0/22:4)  | 18:0/22:4  | 795.5778 | C45 H82 O8 N1 P1 |
| PE(18:0/22:5)  | 18:0/22:5  | 793.5622 | C45 H80 O8 N1 P1 |
| PE(18:0/22:6)  | 18:0/22:6  | 791.5465 | C45 H78 O8 N1 P1 |
| PE(18:0e/20:1) | 18:0e/20:1 | 759.6142 | C43 H86 O7 N1 P1 |
| PE(18:0p)      | 18:0p      | 479.3012 | C23 H46 O7 N1 P1 |
| PE(18:0p/19:1) | 18:0p/19:1 | 743.5829 | C42 H82 O7 N1 P1 |
| PE(18:0p/20:1) | 18:0p/20:1 | 757.5985 | C43 H84 O7 N1 P1 |
| PE(18:0p/21:1) | 18:0p/21:1 | 771.6142 | C44 H86 O7 N1 P1 |
| PE(18:0p/22:1) | 18:0p/22:1 | 785.6298 | C45 H88 O7 N1 P1 |
| PE(18:0p/22:3) | 18:0p/22:3 | 781.5985 | C45 H84 O7 N1 P1 |
| PE(18:0p/22:4) | 18:0p/22:4 | 779.5829 | C45 H82 O7 N1 P1 |
| PE(18:0p/22:6) | 18:0p/22:6 | 775.5516 | C45 H78 O7 N1 P1 |
| PE(18:1/14:0)  | 18:1/14:0  | 689.4996 | C37 H72 O8 N1 P1 |
| PE(18:1/18:1)  | 18:1/18:1  | 743.5465 | C41 H78 O8 N1 P1 |
| PE(18:1/18:2)  | 18:1/18:2  | 741.5309 | C41 H76 O8 N1 P1 |
| PE(18:1/20:4)  | 18:1/20:4  | 765.5309 | C43 H76 O8 N1 P1 |
| PE(18:1p/14:0) | 18:1p/14:0 | 673.5046 | C37 H72 O7 N1 P1 |
| PE(18:1p/16:1) | 18:1p/16:1 | 699.5203 | C39 H74 O7 N1 P1 |
| PE(18:1p/18:1) | 18:1p/18:1 | 727.5516 | C41 H78 O7 N1 P1 |
| PE(18:1p/20:1) | 18:1p/20:1 | 755.5829 | C43 H82 O7 N1 P1 |
| PE(18:1p/20:4) | 18:1p/20:4 | 749.5359 | C43 H76 O7 N1 P1 |
| PE(18:1p/21:1) | 18:1p/21:1 | 769.5985 | C44 H84 O7 N1 P1 |
| PE(18:1p/22:1) | 18:1p/22:1 | 783.6142 | C45 H86 O7 N1 P1 |
| PE(18:1p/22:4) | 18:1p/22:4 | 777.5672 | C45 H80 O7 N1 P1 |
| PE(18:1p/22:6) | 18:1p/22:6 | 773.5359 | C45 H76 O7 N1 P1 |
| PE(18:1p/23:1) | 18:1p/23:1 | 797.6298 | C46 H88 O7 N1 P1 |

|                |            |          |                  |
|----------------|------------|----------|------------------|
| PE(18:1p/24:1) | 18:1p/24:1 | 811.6455 | C47 H90 O7 N1 P1 |
| PE(18:1p/24:2) | 18:1p/24:2 | 809.6298 | C47 H88 O7 N1 P1 |
| PE(19:1)       | 19:01      | 507.2961 | C24 H46 O8 N1 P1 |
| PE(20:0p/22:4) | 20:0p/22:4 | 807.6142 | C47 H86 O7 N1 P1 |
| PE(20:0p/22:5) | 20:0p/22:5 | 805.5985 | C47 H84 O7 N1 P1 |
| PE(20:1/18:1)  | 20:1/18:1  | 771.5778 | C43 H82 O8 N1 P1 |
| PE(20:1/20:1)  | 20:1/20:1  | 799.6091 | C45 H86 O8 N1 P1 |
| PE(20:1/20:4)  | 20:1/20:4  | 793.5622 | C45 H80 O8 N1 P1 |
| PE(20:1p/22:4) | 20:1p/22:4 | 805.5985 | C47 H84 O7 N1 P1 |
| PE(20:2e)      | 20:2e      | 505.3168 | C25 H48 O7 N1 P1 |
| PE(20:4e)      | 20:4e      | 501.2855 | C25 H44 O7 N1 P1 |
| PE(21:0p)      | 21:0p      | 521.3481 | C26 H52 O7 N1 P1 |
| PE(22:2)       | 22:02      | 547.3274 | C27 H50 O8 N1 P1 |
| PE(22:4e)      | 22:4e      | 529.3168 | C27 H48 O7 N1 P1 |
| PE(23:0e)      | 23:0e      | 551.3951 | C28 H58 O7 N1 P1 |
| PE(23:0p)      | 23:0p      | 549.3794 | C28 H56 O7 N1 P1 |
| PE(23:4)       | 23:04      | 557.3118 | C28 H48 O8 N1 P1 |
| PE(24:3e)      | 24:3e      | 559.3638 | C29 H54 O7 N1 P1 |
| PE(24:4e)      | 24:4e      | 557.3481 | C29 H52 O7 N1 P1 |
| PE(24:4p)      | 24:4p      | 555.3325 | C29 H50 O7 N1 P1 |
| PE(25:0e)      | 25:0e      | 579.4264 | C30 H62 O7 N1 P1 |
| PE(26:1/18:1)  | 26:1/18:1  | 855.6717 | C49 H94 O8 N1 P1 |
| PE(26:6)       | 26:06:00   | 595.3274 | C31 H50 O8 N1 P1 |
| PE(27:0e)      | 27:0e      | 607.4577 | C32 H66 O7 N1 P1 |
| PE(27:5)       | 27:05:00   | 611.3587 | C32 H54 O8 N1 P1 |
| PE(29:0e)      | 29:0e      | 635.489  | C34 H70 O7 N1 P1 |
| PE(29:1)       | 29:01:00   | 647.4526 | C34 H66 O8 N1 P1 |
| PE(29:1p)      | 29:1p      | 631.4577 | C34 H66 O7 N1 P1 |
| PE(30:9)       | 30:09:00   | 645.3431 | C35 H52 O8 N1 P1 |
| PE(32:4e)      | 32:4e      | 669.4733 | C37 H68 O7 N1 P1 |
| PE(32:5)       | 32:05:00   | 681.437  | C37 H64 O8 N1 P1 |
| PE(34:1)       | 34:01:00   | 717.5309 | C39 H76 O8 N1 P1 |
| PE(34:3p)      | 34:3p      | 697.5046 | C39 H72 O7 N1 P1 |
| PE(34:4p)      | 34:4p      | 695.489  | C39 H70 O7 N1 P1 |
| PE(34:6)       | 34:06:00   | 707.4526 | C39 H66 O8 N1 P1 |
| PE(34:6e)      | 34:6e      | 693.4733 | C39 H68 O7 N1 P1 |
| PE(34:8)       | 34:08:00   | 703.4213 | C39 H62 O8 N1 P1 |
| PE(35:3)       | 35:03:00   | 727.5152 | C40 H74 O8 N1 P1 |
| PE(36:4)       | 36:04:00   | 739.5152 | C41 H74 O8 N1 P1 |
| PE(36:4e)      | 36:4e      | 725.5359 | C41 H76 O7 N1 P1 |
| PE(36:6)       | 36:06:00   | 735.4839 | C41 H70 O8 N1 P1 |
| PE(37:0)       | 37:00:00   | 761.5935 | C42 H84 O8 N1 P1 |
| PE(37:1)       | 37:01:00   | 759.5778 | C42 H82 O8 N1 P1 |
| PE(37:2)       | 37:02:00   | 757.5622 | C42 H80 O8 N1 P1 |
| PE(37:3)       | 37:03:00   | 755.5465 | C42 H78 O8 N1 P1 |
| PE(37:3p)      | 37:3p      | 739.5516 | C42 H78 O7 N1 P1 |
| PE(37:4)       | 37:04:00   | 753.5309 | C42 H76 O8 N1 P1 |
| PE(38:4e)      | 38:4e      | 753.5672 | C43 H80 O7 N1 P1 |

|                |            |           |                   |
|----------------|------------|-----------|-------------------|
| PE(38:4p)      | 38:4p      | 751.5516  | C43 H78 O7 N1 P1  |
| PE(38:7)       | 38:07:00   | 761.4996  | C43 H72 O8 N1 P1  |
| PE(39:6)       | 39:06:00   | 777.5309  | C44 H76 O8 N1 P1  |
| PE(40:1)       | 40:01:00   | 801.6248  | C45 H88 O8 N1 P1  |
| PE(40:3p)      | 40:3p      | 781.5985  | C45 H84 O7 N1 P1  |
| PE(40:5)       | 40:05:00   | 793.5622  | C45 H80 O8 N1 P1  |
| PE(40:5e)      | 40:5e      | 779.5829  | C45 H82 O7 N1 P1  |
| PE(40:6)       | 40:06:00   | 791.5465  | C45 H78 O8 N1 P1  |
| PE(40:6e)      | 40:6e      | 777.5672  | C45 H80 O7 N1 P1  |
| PE(41:5)       | 41:05:00   | 807.5778  | C46 H82 O8 N1 P1  |
| PE(42:2)       | 42:02:00   | 827.6404  | C47 H90 O8 N1 P1  |
| PE(42:3)       | 42:03:00   | 825.6248  | C47 H88 O8 N1 P1  |
| PE(42:3p)      | 42:3p      | 809.6298  | C47 H88 O7 N1 P1  |
| PE(42:4)       | 42:04:00   | 823.6091  | C47 H86 O8 N1 P1  |
| PE(42:6p)      | 42:6p      | 803.5829  | C47 H82 O7 N1 P1  |
| PE(42:8)       | 42:08:00   | 815.5465  | C47 H78 O8 N1 P1  |
| PE(43:0)       | 43:00:00   | 845.6874  | C48 H96 O8 N1 P1  |
| PE(44:2p)      | 44:2p      | 839.6768  | C49 H94 O7 N1 P1  |
| PE(44:3p)      | 44:3p      | 837.6611  | C49 H92 O7 N1 P1  |
| PE(44:6)       | 44:06:00   | 847.6091  | C49 H86 O8 N1 P1  |
| PE(44:7)       | 44:07:00   | 845.5935  | C49 H84 O8 N1 P1  |
| PE(46:2)       | 46:02:00   | 883.703   | C51 H98 O8 N1 P1  |
| PE(46:3)       | 46:03:00   | 881.6874  | C51 H96 O8 N1 P1  |
| PE(46:5)       | 46:05:00   | 877.6561  | C51 H92 O8 N1 P1  |
| PE(48:7)       | 48:07:00   | 901.6561  | C53 H92 O8 N1 P1  |
| PE(49:5)       | 49:05:00   | 919.703   | C54 H98 O8 N1 P1  |
| PE(50:1)       | 50:01:00   | 941.7813  | C55 H108 O8 N1 P1 |
| PE(50:5)       | 50:05:00   | 933.7187  | C55 H100 O8 N1 P1 |
| PE(50:7)       | 50:07:00   | 929.6874  | C55 H96 O8 N1 P1  |
| PE(52:7)       | 52:07:00   | 957.7187  | C57 H100 O8 N1 P1 |
| PE(53:2)       | 53:02:00   | 981.8126  | C58 H112 O8 N1 P1 |
| PE(54:5)       | 54:05:00   | 989.7813  | C59 H108 O8 N1 P1 |
| PE(56:5)       | 56:05:00   | 1017.8126 | C61 H112 O8 N1 P1 |
| PE(56:6)       | 56:06:00   | 1015.7969 | C61 H110 O8 N1 P1 |
| PE(8:0e/8:0)   | 8:0e/8:0   | 453.2855  | C21 H44 O7 N1 P1  |
| PE(18:0p/18:1) | 18:0p/18:1 | 729.5672  | C41 H80 O7 N1 P1  |
| PE(18:0e)      | 18:0e      | 481.3168  | C23 H48 O7 N1 P1  |
| PE(38:5)       | 38:05:00   | 765.5309  | C43 H76 O8 N1 P1  |
| PE(18:0)       | 18:00      | 495.2961  | C23 H46 O8 N1 P1  |
| PE(32:6e)      | 32:6e      | 665.442   | C37 H64 O7 N1 P1  |
| PE(34:5)       | 34:05:00   | 709.4683  | C39 H68 O8 N1 P1  |
| PE(35:2p)      | 35:2p      | 713.5359  | C40 H76 O7 N1 P1  |
| PE(37:6)       | 37:06:00   | 749.4996  | C42 H72 O8 N1 P1  |
| PE(40:2p)      | 40:2p      | 783.6142  | C45 H86 O7 N1 P1  |
| PE(52:5)       | 52:05:00   | 961.75    | C57 H104 O8 N1 P1 |
| PE(53:6)       | 53:06:00   | 973.75    | C58 H104 O8 N1 P1 |
| PE(54:4)       | 54:04:00   | 991.7969  | C59 H110 O8 N1 P1 |
| PE(54:6)       | 54:06:00   | 987.7656  | C59 H106 O8 N1 P1 |

|               |           |          |                   |
|---------------|-----------|----------|-------------------|
| PI(16:0/18:1) | 16:0/18:1 | 836.5415 | C43 H81 O13 N0 P1 |
| PI(16:0/20:4) | 16:0/20:4 | 858.5258 | C45 H79 O13 N0 P1 |
| PI(16:1)      | 16:01     | 584.2598 | C25 H45 O13 N0 P1 |
| PI(17:1)      | 17:01     | 598.2754 | C26 H47 O13 N0 P1 |
| PI(18:0/18:2) | 18:0/18:2 | 862.5571 | C45 H83 O13 N0 P1 |
| PI(18:0/20:4) | 18:0/20:4 | 886.5571 | C47 H83 O13 N0 P1 |
| PI(18:1/20:4) | 18:1/20:4 | 884.5415 | C47 H81 O13 N0 P1 |
| PI(22:0)      | 22:00     | 670.3693 | C31 H59 O13 N0 P1 |
| PI(23:2)      | 23:02     | 680.3537 | C32 H57 O13 N0 P1 |
| PI(23:4e)     | 23:4e     | 662.3431 | C32 H55 O12 N0 P1 |
| PI(25:3)      | 25:03:00  | 706.3693 | C34 H59 O13 N0 P1 |
| PI(25:4)      | 25:04:00  | 704.3537 | C34 H57 O13 N0 P1 |
| PI(25:5)      | 25:05:00  | 702.338  | C34 H55 O13 N0 P1 |
| PI(26:2p)     | 26:2p     | 706.4057 | C35 H63 O12 N0 P1 |
| PI(26:3p)     | 26:3p     | 704.3901 | C35 H61 O12 N0 P1 |
| PI(27:0)      | 27:00:00  | 740.4476 | C36 H69 O13 N0 P1 |
| PI(27:3)      | 27:03:00  | 734.4006 | C36 H63 O13 N0 P1 |
| PI(27:4e)     | 27:4e     | 718.4057 | C36 H63 O12 N0 P1 |
| PI(29:4p)     | 29:4p     | 744.4214 | C38 H65 O12 N0 P1 |
| PI(30:7)      | 30:07:00  | 768.385  | C39 H61 O13 N0 P1 |
| PI(31:1p)     | 31:1p     | 778.4996 | C40 H75 O12 N0 P1 |
| PI(31:3)      | 31:03:00  | 790.4632 | C40 H71 O13 N0 P1 |
| PI(32:0)      | 32:00:00  | 810.5258 | C41 H79 O13 N0 P1 |
| PI(32:0e)     | 32:0e     | 796.5466 | C41 H81 O12 N0 P1 |
| PI(32:1p)     | 32:1p     | 792.5153 | C41 H77 O12 N0 P1 |
| PI(32:3)      | 32:03:00  | 804.4789 | C41 H73 O13 N0 P1 |
| PI(32:4)      | 32:04:00  | 802.4632 | C41 H71 O13 N0 P1 |
| PI(32:8)      | 32:08:00  | 794.4006 | C41 H63 O13 N0 P1 |
| PI(33:1)      | 33:01:00  | 822.5258 | C42 H79 O13 N0 P1 |
| PI(33:2)      | 33:02:00  | 820.5102 | C42 H77 O13 N0 P1 |
| PI(33:8)      | 33:08:00  | 808.4163 | C42 H65 O13 N0 P1 |
| PI(34:2)      | 34:02:00  | 834.5258 | C43 H79 O13 N0 P1 |
| PI(34:2e)     | 34:2e     | 820.5466 | C43 H81 O12 N0 P1 |
| PI(34:3)      | 34:03:00  | 832.5102 | C43 H77 O13 N0 P1 |
| PI(34:3p)     | 34:3p     | 816.5153 | C43 H77 O12 N0 P1 |
| PI(34:6p)     | 34:6p     | 810.4683 | C43 H71 O12 N0 P1 |
| PI(34:8)      | 34:08:00  | 822.4319 | C43 H67 O13 N0 P1 |
| PI(35:6)      | 35:06:00  | 840.4789 | C44 H73 O13 N0 P1 |
| PI(36:4e)     | 36:4e     | 844.5466 | C45 H81 O12 N0 P1 |
| PI(36:5)      | 36:05:00  | 856.5102 | C45 H77 O13 N0 P1 |
| PI(36:5p)     | 36:5p     | 840.5153 | C45 H77 O12 N0 P1 |
| PI(38:0)      | 38:00:00  | 894.6197 | C47 H91 O13 N0 P1 |
| PI(38:5)      | 38:05:00  | 884.5415 | C47 H81 O13 N0 P1 |
| PI(38:8)      | 38:08:00  | 878.4945 | C47 H75 O13 N0 P1 |
| PI(38:9)      | 38:09:00  | 876.4789 | C47 H73 O13 N0 P1 |
| PI(39:1p)     | 39:1p     | 890.6248 | C48 H91 O12 N0 P1 |
| PI(39:5)      | 39:05:00  | 898.5571 | C48 H83 O13 N0 P1 |
| PI(40:1e)     | 40:1e     | 906.6561 | C49 H95 O12 N0 P1 |

|                |            |           |                    |
|----------------|------------|-----------|--------------------|
| PI(40:5e)      | 40:5e      | 898.5935  | C49 H87 O12 N0 P1  |
| PI(40:7)       | 40:07:00   | 908.5415  | C49 H81 O13 N0 P1  |
| PI(40:7p)      | 40:7p      | 892.5466  | C49 H81 O12 N0 P1  |
| PI(40:8)       | 40:08:00   | 906.5258  | C49 H79 O13 N0 P1  |
| PI(42:1)       | 42:01:00   | 948.6667  | C51 H97 O13 N0 P1  |
| PI(42:10)      | 42:10:00   | 930.5258  | C51 H79 O13 N0 P1  |
| PI(42:4)       | 42:04:00   | 942.6197  | C51 H91 O13 N0 P1  |
| PI(43:0)       | 43:00:00   | 964.698   | C52 H101 O13 N0 P1 |
| PI(43:1p)      | 43:1p      | 946.6874  | C52 H99 O12 N0 P1  |
| PI(43:6)       | 43:06:00   | 952.6041  | C52 H89 O13 N0 P1  |
| PI(44:5)       | 44:05:00   | 968.6354  | C53 H93 O13 N0 P1  |
| PI(45:0)       | 45:00:00   | 992.7293  | C54 H105 O13 N0 P1 |
| PI(47:5)       | 47:05:00   | 1010.6823 | C56 H99 O13 N0 P1  |
| PI(50:3)       | 50:03:00   | 1056.7606 | C59 H109 O13 N0 P1 |
| PI(50:7)       | 50:07:00   | 1048.698  | C59 H101 O13 N0 P1 |
| PI(52:4)       | 52:04:00   | 1082.7762 | C61 H111 O13 N0 P1 |
| PI(54:1)       | 54:01:00   | 1116.8545 | C63 H121 O13 N0 P1 |
| PI(56:7)       | 56:07:00   | 1132.7919 | C65 H113 O13 N0 P1 |
| PI(59:0)       | 59:00:00   | 1188.9484 | C68 H133 O13 N0 P1 |
| PI(18:0/20:3)  | 18:0/20:3  | 888.5728  | C47 H85 O13 N0 P1  |
| PI(15:2)       | 15:02      | 568.2285  | C24 H41 O13 N0 P1  |
| PI(25:0)       | 25:00:00   | 712.4163  | C34 H65 O13 N0 P1  |
| PI(27:0p)      | 27:0p      | 724.4527  | C36 H69 O12 N0 P1  |
| PI(28:2)       | 28:02:00   | 750.4319  | C37 H67 O13 N0 P1  |
| PI(28:5p)      | 28:5p      | 728.3901  | C37 H61 O12 N0 P1  |
| PI(31:1)       | 31:01:00   | 794.4945  | C40 H75 O13 N0 P1  |
| PI(32:2p)      | 32:2p      | 790.4996  | C41 H75 O12 N0 P1  |
| PI(33:0)       | 33:00:00   | 824.5415  | C42 H81 O13 N0 P1  |
| PI(34:1)       | 34:01:00   | 836.5415  | C43 H81 O13 N0 P1  |
| PI(36:1e)      | 36:1e      | 850.5935  | C45 H87 O12 N0 P1  |
| PI(36:2e)      | 36:2e      | 848.5779  | C45 H85 O12 N0 P1  |
| PI(37:3)       | 37:03:00   | 874.5571  | C46 H83 O13 N0 P1  |
| PI(38:1)       | 38:01:00   | 892.6041  | C47 H89 O13 N0 P1  |
| PI(40:9)       | 40:09:00   | 904.5102  | C49 H77 O13 N0 P1  |
| PI(55:1)       | 55:01:00   | 1130.8701 | C64 H123 O13 N0 P1 |
| PS(16:0/18:1)  | 16:0/18:1  | 761.5207  | C40 H76 O10 N1 P1  |
| PS(16:0p/18:1) | 16:0p/18:1 | 745.5258  | C40 H76 O9 N1 P1   |
| PS(18:0/18:1)  | 18:0/18:1  | 789.552   | C42 H80 O10 N1 P1  |
| PS(18:0/20:1)  | 18:0/20:1  | 817.5833  | C44 H84 O10 N1 P1  |
| PS(18:0/20:3)  | 18:0/20:3  | 813.552   | C44 H80 O10 N1 P1  |
| PS(18:0/20:4)  | 18:0/20:4  | 811.5363  | C44 H78 O10 N1 P1  |
| PS(18:0/22:3)  | 18:0/22:3  | 841.5833  | C46 H84 O10 N1 P1  |
| PS(18:0/22:4)  | 18:0/22:4  | 839.5676  | C46 H82 O10 N1 P1  |
| PS(18:0/22:6)  | 18:0/22:6  | 835.5363  | C46 H78 O10 N1 P1  |
| PS(18:1/18:1)  | 18:1/18:1  | 787.5363  | C42 H78 O10 N1 P1  |
| PS(18:1/20:4)  | 18:1/20:4  | 809.5207  | C44 H76 O10 N1 P1  |
| PS(18:1/22:0)  | 18:1/22:0  | 845.6146  | C46 H88 O10 N1 P1  |
| PS(18:1/22:1)  | 18:1/22:1  | 843.5989  | C46 H86 O10 N1 P1  |

|               |           |          |                   |
|---------------|-----------|----------|-------------------|
| PS(18:1/23:0) | 18:1/23:0 | 859.6302 | C47 H90 O10 N1 P1 |
| PS(18:1/24:0) | 18:1/24:0 | 873.6459 | C48 H92 O10 N1 P1 |
| PS(18:1/24:1) | 18:1/24:1 | 871.6302 | C48 H90 O10 N1 P1 |
| PS(20:1/18:1) | 20:1/18:1 | 815.5676 | C44 H82 O10 N1 P1 |
| PS(21:3)      | 21:03     | 575.2859 | C27 H46 O10 N1 P1 |
| PS(22:1)      | 22:01     | 593.3329 | C28 H52 O10 N1 P1 |
| PS(23:0)      | 23:00     | 609.3642 | C29 H56 O10 N1 P1 |
| PS(23:1)      | 23:01     | 607.3485 | C29 H54 O10 N1 P1 |
| PS(23:3)      | 23:03     | 603.3172 | C29 H50 O10 N1 P1 |
| PS(24:1/18:2) | 24:1/18:2 | 869.6146 | C48 H88 O10 N1 P1 |
| PS(24:2/18:2) | 24:2/18:2 | 867.5989 | C48 H86 O10 N1 P1 |
| PS(24:4e)     | 24:4e     | 601.338  | C30 H52 O9 N1 P1  |
| PS(26:1/18:1) | 26:1/18:1 | 899.6615 | C50 H94 O10 N1 P1 |
| PS(27:0)      | 27:00:00  | 665.4268 | C33 H64 O10 N1 P1 |
| PS(28:0)      | 28:00:00  | 679.4424 | C34 H66 O10 N1 P1 |
| PS(28:0p)     | 28:0p     | 663.4475 | C34 H66 O9 N1 P1  |
| PS(28:1)      | 28:01:00  | 677.4268 | C34 H64 O10 N1 P1 |
| PS(28:1e)     | 28:1e     | 663.4475 | C34 H66 O9 N1 P1  |
| PS(29:0)      | 29:00:00  | 693.4581 | C35 H68 O10 N1 P1 |
| PS(29:3)      | 29:03:00  | 687.4111 | C35 H62 O10 N1 P1 |
| PS(29:5p)     | 29:5p     | 667.3849 | C35 H58 O9 N1 P1  |
| PS(30:0)      | 30:00:00  | 707.4737 | C36 H70 O10 N1 P1 |
| PS(30:4)      | 30:04:00  | 699.4111 | C36 H62 O10 N1 P1 |
| PS(30:4p)     | 30:4p     | 683.4162 | C36 H62 O9 N1 P1  |
| PS(31:0)      | 31:00:00  | 721.4894 | C37 H72 O10 N1 P1 |
| PS(31:4e)     | 31:4e     | 699.4475 | C37 H66 O9 N1 P1  |
| PS(31:5p)     | 31:5p     | 695.4162 | C37 H62 O9 N1 P1  |
| PS(31:9)      | 31:09:00  | 703.3485 | C37 H54 O10 N1 P1 |
| PS(32:0)      | 32:00:00  | 735.505  | C38 H74 O10 N1 P1 |
| PS(32:1)      | 32:01:00  | 733.4894 | C38 H72 O10 N1 P1 |
| PS(32:2)      | 32:02:00  | 731.4737 | C38 H70 O10 N1 P1 |
| PS(32:4e)     | 32:4e     | 713.4632 | C38 H68 O9 N1 P1  |
| PS(32:4p)     | 32:4p     | 711.4475 | C38 H66 O9 N1 P1  |
| PS(33:10)     | 33:10:00  | 729.3642 | C39 H56 O10 N1 P1 |
| PS(33:7)      | 33:07:00  | 735.4111 | C39 H62 O10 N1 P1 |
| PS(34:1)      | 34:01:00  | 761.5207 | C40 H76 O10 N1 P1 |
| PS(34:2)      | 34:02:00  | 759.505  | C40 H74 O10 N1 P1 |
| PS(34:6e)     | 34:6e     | 737.4632 | C40 H68 O9 N1 P1  |
| PS(34:6p)     | 34:6p     | 735.4475 | C40 H66 O9 N1 P1  |
| PS(36:0)      | 36:00:00  | 791.5676 | C42 H82 O10 N1 P1 |
| PS(36:1)      | 36:01:00  | 789.552  | C42 H80 O10 N1 P1 |
| PS(36:1e)     | 36:1e     | 775.5727 | C42 H82 O9 N1 P1  |
| PS(36:2p)     | 36:2p     | 771.5414 | C42 H78 O9 N1 P1  |
| PS(37:0)      | 37:00:00  | 805.5833 | C43 H84 O10 N1 P1 |
| PS(37:1)      | 37:01:00  | 803.5676 | C43 H82 O10 N1 P1 |
| PS(37:2)      | 37:02:00  | 801.552  | C43 H80 O10 N1 P1 |
| PS(37:5)      | 37:05:00  | 795.505  | C43 H74 O10 N1 P1 |
| PS(38:2e)     | 38:2e     | 801.5884 | C44 H84 O9 N1 P1  |

|                |            |          |                    |
|----------------|------------|----------|--------------------|
| PS(38:7p)      | 38:7p      | 789.4945 | C44 H72 O9 N1 P1   |
| PS(38:8)       | 38:08:00   | 803.4737 | C44 H70 O10 N1 P1  |
| PS(39:1)       | 39:01:00   | 831.5989 | C45 H86 O10 N1 P1  |
| PS(39:4)       | 39:04:00   | 825.552  | C45 H80 O10 N1 P1  |
| PS(39:6)       | 39:06:00   | 821.5207 | C45 H76 O10 N1 P1  |
| PS(39:7)       | 39:07:00   | 819.505  | C45 H74 O10 N1 P1  |
| PS(40:10)      | 40:10:00   | 827.4737 | C46 H70 O10 N1 P1  |
| PS(40:3p)      | 40:3p      | 825.5884 | C46 H84 O9 N1 P1   |
| PS(41:3p)      | 41:3p      | 839.604  | C47 H86 O9 N1 P1   |
| PS(42:3)       | 42:03:00   | 869.6146 | C48 H88 O10 N1 P1  |
| PS(42:4)       | 42:04:00   | 867.5989 | C48 H86 O10 N1 P1  |
| PS(43:4)       | 43:04:00   | 881.6146 | C49 H88 O10 N1 P1  |
| PS(44:0)       | 44:00:00   | 903.6928 | C50 H98 O10 N1 P1  |
| PS(44:4)       | 44:04:00   | 895.6302 | C50 H90 O10 N1 P1  |
| PS(45:0)       | 45:00:00   | 917.7085 | C51 H100 O10 N1 P1 |
| PS(45:6)       | 45:06:00   | 905.6146 | C51 H88 O10 N1 P1  |
| PS(47:7)       | 47:07:00   | 931.6302 | C53 H90 O10 N1 P1  |
| PS(48:7)       | 48:07:00   | 945.6459 | C54 H92 O10 N1 P1  |
| PS(49:0)       | 49:00:00   | 973.7711 | C55 H108 O10 N1 P1 |
| PS(21:0p)      | 21:0p      | 565.338  | C27 H52 O9 N1 P1   |
| PS(23:0p)      | 23:0p      | 593.3693 | C29 H56 O9 N1 P1   |
| PS(26:2)       | 26:02:00   | 647.3798 | C32 H58 O10 N1 P1  |
| PS(28:2)       | 28:02:00   | 675.4111 | C34 H62 O10 N1 P1  |
| PS(31:4p)      | 31:4p      | 697.4319 | C37 H64 O9 N1 P1   |
| PS(32:1p)      | 32:1p      | 717.4945 | C38 H72 O9 N1 P1   |
| PS(34:2e)      | 34:2e      | 745.5258 | C40 H76 O9 N1 P1   |
| PS(35:0)       | 35:00:00   | 777.552  | C41 H80 O10 N1 P1  |
| PS(35:1p)      | 35:1p      | 759.5414 | C41 H78 O9 N1 P1   |
| PS(37:1p)      | 37:1p      | 787.5727 | C43 H82 O9 N1 P1   |
| PS(40:4)       | 40:04:00   | 839.5676 | C46 H82 O10 N1 P1  |
| PS(40:8p)      | 40:8p      | 815.5101 | C46 H74 O9 N1 P1   |
| PS(44:11)      | 44:11:00   | 881.5207 | C50 H76 O10 N1 P1  |
| PC(14:0p/18:1) | 14:0p/18:1 | 715.5516 | C40 H78 O7 N1 P1   |
| PC(17:1/18:1)  | 17:1/18:1  | 771.5778 | C43 H82 O8 N1 P1   |
| PC(18:0p/16:0) | 18:0p/16:0 | 745.5985 | C42 H84 O7 N1 P1   |
| PC(25:0e)      | 25:0e      | 621.4733 | C33 H68 O7 N1 P1   |
| PC(25:0p)      | 25:0p      | 619.4577 | C33 H66 O7 N1 P1   |
| PC(27:0/16:0)  | 27:0/16:0  | 887.7343 | C51 H102 O8 N1 P1  |
| PC(27:0e)      | 27:0e      | 649.5046 | C35 H72 O7 N1 P1   |
| PC(27:0p)      | 27:0p      | 647.489  | C35 H70 O7 N1 P1   |
| PC(27:1/16:0)  | 27:1/16:0  | 885.7187 | C51 H100 O8 N1 P1  |
| PC(28:2e)      | 28:2e      | 659.489  | C36 H70 O7 N1 P1   |
| PC(29:0)       | 29:00:00   | 691.5152 | C37 H74 O8 N1 P1   |
| PC(29:0p)      | 29:0p      | 675.5203 | C37 H74 O7 N1 P1   |
| PC(30:1/16:0)  | 30:1/16:0  | 927.7656 | C54 H106 O8 N1 P1  |
| PC(31:0e)      | 31:0e      | 705.5672 | C39 H80 O7 N1 P1   |
| PC(31:1/16:0)  | 31:1/16:0  | 941.7813 | C55 H108 O8 N1 P1  |
| PC(31:8)       | 31:08:00   | 703.4213 | C39 H62 O8 N1 P1   |



|           |          |          |                   |
|-----------|----------|----------|-------------------|
| PC(33:2)  | 33:02:00 | 743.5465 | C41 H78 O8 N1 P1  |
| PC(33:3)  | 33:03:00 | 741.5309 | C41 H76 O8 N1 P1  |
| PC(34:0)  | 34:00:00 | 761.5935 | C42 H84 O8 N1 P1  |
| PC(34:1)  | 34:01:00 | 759.5778 | C42 H82 O8 N1 P1  |
| PC(34:4)  | 34:04:00 | 753.5309 | C42 H76 O8 N1 P1  |
| PC(35:0p) | 35:0p    | 759.6142 | C43 H86 O7 N1 P1  |
| PC(35:1p) | 35:1p    | 757.5985 | C43 H84 O7 N1 P1  |
| PC(35:1p) | 35:1p    | 757.5985 | C43 H84 O7 N1 P1  |
| PC(35:4)  | 35:04:00 | 767.5465 | C43 H78 O8 N1 P1  |
| PC(35:5)  | 35:05:00 | 765.5309 | C43 H76 O8 N1 P1  |
| PC(36:0)  | 36:00:00 | 789.6248 | C44 H88 O8 N1 P1  |
| PC(37:2)  | 37:02:00 | 799.6091 | C45 H86 O8 N1 P1  |
| PC(37:2)  | 37:02:00 | 799.6091 | C45 H86 O8 N1 P1  |
| PC(37:2p) | 37:2p    | 783.6142 | C45 H86 O7 N1 P1  |
| PC(37:4)  | 37:04:00 | 795.5778 | C45 H82 O8 N1 P1  |
| PC(37:6)  | 37:06:00 | 791.5465 | C45 H78 O8 N1 P1  |
| PC(37:6)  | 37:06:00 | 791.5465 | C45 H78 O8 N1 P1  |
| PC(38:1e) | 38:1e    | 801.6611 | C46 H92 O7 N1 P1  |
| PC(38:4e) | 38:4e    | 795.6142 | C46 H86 O7 N1 P1  |
| PC(38:6e) | 38:6e    | 791.5829 | C46 H82 O7 N1 P1  |
| PC(39:1)  | 39:01:00 | 829.6561 | C47 H92 O8 N1 P1  |
| PC(39:4)  | 39:04:00 | 823.6091 | C47 H86 O8 N1 P1  |
| PC(39:6)  | 39:06:00 | 819.5778 | C47 H82 O8 N1 P1  |
| PC(40:0)  | 40:00:00 | 845.6874 | C48 H96 O8 N1 P1  |
| PC(40:1e) | 40:1e    | 829.6924 | C48 H96 O7 N1 P1  |
| PC(40:2e) | 40:2e    | 827.6768 | C48 H94 O7 N1 P1  |
| PC(40:8)  | 40:08:00 | 829.5622 | C48 H80 O8 N1 P1  |
| PC(40:8p) | 40:8p    | 813.5672 | C48 H80 O7 N1 P1  |
| PC(41:0)  | 41:00:00 | 859.703  | C49 H98 O8 N1 P1  |
| PC(42:0e) | 42:0e    | 859.7394 | C50 H102 O7 N1 P1 |
| PC(42:2e) | 42:2e    | 855.7081 | C50 H98 O7 N1 P1  |
| PC(42:2p) | 42:2p    | 853.6924 | C50 H96 O7 N1 P1  |
| PC(42:3)  | 42:03:00 | 867.6717 | C50 H94 O8 N1 P1  |
| PC(42:4p) | 42:4p    | 849.6611 | C50 H92 O7 N1 P1  |
| PC(43:3)  | 43:03:00 | 881.6874 | C51 H96 O8 N1 P1  |
| PC(43:3)  | 43:03:00 | 881.6874 | C51 H96 O8 N1 P1  |
| PC(44:0)  | 44:00:00 | 901.75   | C52 H104 O8 N1 P1 |
| PC(44:2p) | 44:2p    | 881.7237 | C52 H100 O7 N1 P1 |
| PC(44:4)  | 44:04:00 | 893.6874 | C52 H96 O8 N1 P1  |
| PC(44:4)  | 44:04:00 | 893.6874 | C52 H96 O8 N1 P1  |
| PC(44:5)  | 44:05:00 | 891.6717 | C52 H94 O8 N1 P1  |
| PC(45:3)  | 45:03:00 | 909.7187 | C53 H100 O8 N1 P1 |
| PC(45:3)  | 45:03:00 | 909.7187 | C53 H100 O8 N1 P1 |
| PC(45:4)  | 45:04:00 | 907.703  | C53 H98 O8 N1 P1  |
| PC(45:5)  | 45:05:00 | 905.6874 | C53 H96 O8 N1 P1  |
| PC(46:3)  | 46:03:00 | 923.7343 | C54 H102 O8 N1 P1 |
| PC(46:4)  | 46:04:00 | 921.7187 | C54 H100 O8 N1 P1 |
| PC(46:6)  | 46:06:00 | 917.6874 | C54 H96 O8 N1 P1  |

|                |            |           |                   |
|----------------|------------|-----------|-------------------|
| PC(47:3)       | 47:03:00   | 937.75    | C55 H104 O8 N1 P1 |
| PC(47:4)       | 47:04:00   | 935.7343  | C55 H102 O8 N1 P1 |
| PC(47:5)       | 47:05:00   | 933.7187  | C55 H100 O8 N1 P1 |
| PC(48:3)       | 48:03:00   | 951.7656  | C56 H106 O8 N1 P1 |
| PC(49:2)       | 49:02:00   | 967.7969  | C57 H110 O8 N1 P1 |
| PC(50:3)       | 50:03:00   | 979.7969  | C58 H110 O8 N1 P1 |
| PC(50:5)       | 50:05:00   | 975.7656  | C58 H106 O8 N1 P1 |
| PC(52:5)       | 52:05:00   | 1003.7969 | C60 H110 O8 N1 P1 |
| PC(54:5)       | 54:05:00   | 1031.8282 | C62 H114 O8 N1 P1 |
| PC(54:6)       | 54:06:00   | 1029.8126 | C62 H112 O8 N1 P1 |
| PC(54:7)       | 54:07:00   | 1027.7969 | C62 H110 O8 N1 P1 |
| PC(58:5)       | 58:05:00   | 1087.8908 | C66 H122 O8 N1 P1 |
| PC(15:0/18:1)  | 15:0/18:1  | 745.5622  | C41 H80 O8 N1 P1  |
| PC(16:0p/16:0) | 16:0p/16:0 | 717.5672  | C40 H80 O7 N1 P1  |
| PC(16:0p/18:1) | 16:0p/18:1 | 743.5829  | C42 H82 O7 N1 P1  |
| PC(17:0/18:1)  | 17:0/18:1  | 773.5935  | C43 H84 O8 N1 P1  |
| PC(17:1/18:1)  | 17:1/18:1  | 771.5778  | C43 H82 O8 N1 P1  |
| PC(18:2p/18:0) | 18:2p/18:0 | 769.5985  | C44 H84 O7 N1 P1  |
| PC(26:1/16:0)  | 26:1/16:0  | 871.703   | C50 H98 O8 N1 P1  |
| PC(26:1/17:1)  | 26:1/17:1  | 883.703   | C51 H98 O8 N1 P1  |
| PC(26:1/19:1)  | 26:1/19:1  | 911.7343  | C53 H102 O8 N1 P1 |
| PC(28:0)       | 28:00:00   | 677.4996  | C36 H72 O8 N1 P1  |
| PC(28:1/16:0)  | 28:1/16:0  | 899.7343  | C52 H102 O8 N1 P1 |
| PC(30:0)       | 30:00:00   | 705.5309  | C38 H76 O8 N1 P1  |
| PC(30:0e)      | 30:0e      | 691.5516  | C38 H78 O7 N1 P1  |
| PC(30:1)       | 30:01:00   | 703.5152  | C38 H74 O8 N1 P1  |
| PC(31:0p)      | 31:0p      | 703.5516  | C39 H78 O7 N1 P1  |
| PC(31:1)       | 31:01:00   | 717.5309  | C39 H76 O8 N1 P1  |
| PC(32:0e)      | 32:0e      | 719.5829  | C40 H82 O7 N1 P1  |
| PC(32:1)       | 32:01:00   | 731.5465  | C40 H78 O8 N1 P1  |
| PC(32:2)       | 32:02:00   | 729.5309  | C40 H76 O8 N1 P1  |
| PC(32:3)       | 32:03:00   | 727.5152  | C40 H74 O8 N1 P1  |
| PC(33:0)       | 33:00:00   | 747.5778  | C41 H82 O8 N1 P1  |
| PC(33:2)       | 33:02:00   | 743.5465  | C41 H78 O8 N1 P1  |
| PC(34:0)       | 34:00:00   | 761.5935  | C42 H84 O8 N1 P1  |
| PC(34:0e)      | 34:0e      | 747.6142  | C42 H86 O7 N1 P1  |
| PC(34:1)       | 34:01:00   | 759.5778  | C42 H82 O8 N1 P1  |
| PC(34:2)       | 34:02:00   | 757.5622  | C42 H80 O8 N1 P1  |
| PC(34:3)       | 34:03:00   | 755.5465  | C42 H78 O8 N1 P1  |
| PC(36:0)       | 36:00:00   | 789.6248  | C44 H88 O8 N1 P1  |
| PC(36:2)       | 36:02:00   | 785.5935  | C44 H84 O8 N1 P1  |
| PC(36:3)       | 36:03:00   | 783.5778  | C44 H82 O8 N1 P1  |
| PC(38:2)       | 38:02:00   | 813.6248  | C46 H88 O8 N1 P1  |
| PC(38:3)       | 38:03:00   | 811.6091  | C46 H86 O8 N1 P1  |
| PC(38:5)       | 38:05:00   | 807.5778  | C46 H82 O8 N1 P1  |
| PC(38:6)       | 38:06:00   | 805.5622  | C46 H80 O8 N1 P1  |
| PC(38:6e)      | 38:6e      | 791.5829  | C46 H82 O7 N1 P1  |
| PC(40:4)       | 40:04:00   | 837.6248  | C48 H88 O8 N1 P1  |

|                |            |          |                   |
|----------------|------------|----------|-------------------|
| PC(40:5)       | 40:05:00   | 835.6091 | C48 H86 O8 N1 P1  |
| PC(40:6)       | 40:06:00   | 833.5935 | C48 H84 O8 N1 P1  |
| PC(40:7)       | 40:07:00   | 831.5778 | C48 H82 O8 N1 P1  |
| PC(48:2)       | 48:02:00   | 953.7813 | C56 H108 O8 N1 P1 |
| PC(48:6)       | 48:06:00   | 945.7187 | C56 H100 O8 N1 P1 |
| PC(37:6)       | 37:06:00   | 791.5465 | C45 H78 O8 N1 P1  |
| PC(48:3)       | 48:03:00   | 951.7656 | C56 H106 O8 N1 P1 |
| PE(15:1)       | 15:01      | 451.2335 | C20 H38 O8 N1 P1  |
| PE(16:0p/18:1) | 16:0p/18:1 | 701.5359 | C39 H76 O7 N1 P1  |
| PE(16:0p/18:1) | 16:0p/18:1 | 701.5359 | C39 H76 O7 N1 P1  |
| PE(16:0p/20:3) | 16:0p/20:3 | 725.5359 | C41 H76 O7 N1 P1  |
| PE(16:0p/22:3) | 16:0p/22:3 | 753.5672 | C43 H80 O7 N1 P1  |
| PE(18:0/20:1)  | 18:0/20:1  | 773.5935 | C43 H84 O8 N1 P1  |
| PE(18:0/22:3)  | 18:0/22:3  | 797.5935 | C45 H84 O8 N1 P1  |
| PE(18:0e/20:1) | 18:0e/20:1 | 759.6142 | C43 H86 O7 N1 P1  |
| PE(18:0p)      | 18:0p      | 479.3012 | C23 H46 O7 N1 P1  |
| PE(18:0p/21:1) | 18:0p/21:1 | 771.6142 | C44 H86 O7 N1 P1  |
| PE(18:0p/22:1) | 18:0p/22:1 | 785.6298 | C45 H88 O7 N1 P1  |
| PE(18:0p/22:3) | 18:0p/22:3 | 781.5985 | C45 H84 O7 N1 P1  |
| PE(18:0p/22:4) | 18:0p/22:4 | 779.5829 | C45 H82 O7 N1 P1  |
| PE(18:1/18:2)  | 18:1/18:2  | 741.5309 | C41 H76 O8 N1 P1  |
| PE(18:1/20:4)  | 18:1/20:4  | 765.5309 | C43 H76 O8 N1 P1  |
| PE(18:1p/14:0) | 18:1p/14:0 | 673.5046 | C37 H72 O7 N1 P1  |
| PE(18:1p/16:1) | 18:1p/16:1 | 699.5203 | C39 H74 O7 N1 P1  |
| PE(18:1p/18:1) | 18:1p/18:1 | 727.5516 | C41 H78 O7 N1 P1  |
| PE(18:1p/18:1) | 18:1p/18:1 | 727.5516 | C41 H78 O7 N1 P1  |
| PE(18:1p/21:1) | 18:1p/21:1 | 769.5985 | C44 H84 O7 N1 P1  |
| PE(18:1p/22:6) | 18:1p/22:6 | 773.5359 | C45 H76 O7 N1 P1  |
| PE(18:1p/23:1) | 18:1p/23:1 | 797.6298 | C46 H88 O7 N1 P1  |
| PE(18:1p/24:1) | 18:1p/24:1 | 811.6455 | C47 H90 O7 N1 P1  |
| PE(18:1p/24:2) | 18:1p/24:2 | 809.6298 | C47 H88 O7 N1 P1  |
| PE(20:0p/22:4) | 20:0p/22:4 | 807.6142 | C47 H86 O7 N1 P1  |
| PE(20:1/18:1)  | 20:1/18:1  | 771.5778 | C43 H82 O8 N1 P1  |
| PE(20:1p/22:4) | 20:1p/22:4 | 805.5985 | C47 H84 O7 N1 P1  |
| PE(22:2)       | 22:02      | 547.3274 | C27 H50 O8 N1 P1  |
| PE(23:0e)      | 23:0e      | 551.3951 | C28 H58 O7 N1 P1  |
| PE(23:0p)      | 23:0p      | 549.3794 | C28 H56 O7 N1 P1  |
| PE(24:3e)      | 24:3e      | 559.3638 | C29 H54 O7 N1 P1  |
| PE(25:0e)      | 25:0e      | 579.4264 | C30 H62 O7 N1 P1  |
| PE(26:1/18:1)  | 26:1/18:1  | 855.6717 | C49 H94 O8 N1 P1  |
| PE(29:1)       | 29:01:00   | 647.4526 | C34 H66 O8 N1 P1  |
| PE(38:4e)      | 38:4e      | 753.5672 | C43 H80 O7 N1 P1  |
| PE(42:4)       | 42:04:00   | 823.6091 | C47 H86 O8 N1 P1  |
| PE(50:5)       | 50:05:00   | 933.7187 | C55 H100 O8 N1 P1 |
| PE(50:7)       | 50:07:00   | 929.6874 | C55 H96 O8 N1 P1  |
| PE(52:7)       | 52:07:00   | 957.7187 | C57 H100 O8 N1 P1 |
| PE(16:0p/18:1) | 16:0p/18:1 | 701.5359 | C39 H76 O7 N1 P1  |
| PE(16:0p/20:4) | 16:0p/20:4 | 723.5203 | C41 H74 O7 N1 P1  |

|                |            |          |                   |
|----------------|------------|----------|-------------------|
| PE(16:0p/22:4) | 16:0p/22:4 | 751.5516 | C43 H78 O7 N1 P1  |
| PE(16:0p/22:6) | 16:0p/22:6 | 747.5203 | C43 H74 O7 N1 P1  |
| PE(18:0/18:1)  | 18:0/18:1  | 745.5622 | C41 H80 O8 N1 P1  |
| PE(18:0/20:4)  | 18:0/20:4  | 767.5465 | C43 H78 O8 N1 P1  |
| PE(18:0/22:4)  | 18:0/22:4  | 795.5778 | C45 H82 O8 N1 P1  |
| PE(18:0/22:6)  | 18:0/22:6  | 791.5465 | C45 H78 O8 N1 P1  |
| PE(18:0p/20:1) | 18:0p/20:1 | 757.5985 | C43 H84 O7 N1 P1  |
| PE(18:0p/22:4) | 18:0p/22:4 | 779.5829 | C45 H82 O7 N1 P1  |
| PE(18:0p/22:6) | 18:0p/22:6 | 775.5516 | C45 H78 O7 N1 P1  |
| PE(18:1/18:1)  | 18:1/18:1  | 743.5465 | C41 H78 O8 N1 P1  |
| PE(18:1p/18:1) | 18:1p/18:1 | 727.5516 | C41 H78 O7 N1 P1  |
| PE(18:1p/20:1) | 18:1p/20:1 | 755.5829 | C43 H82 O7 N1 P1  |
| PE(18:1p/20:4) | 18:1p/20:4 | 749.5359 | C43 H76 O7 N1 P1  |
| PE(18:1p/22:1) | 18:1p/22:1 | 783.6142 | C45 H86 O7 N1 P1  |
| PE(18:1p/22:4) | 18:1p/22:4 | 777.5672 | C45 H80 O7 N1 P1  |
| PE(16:0/18:1)  | 16:0/18:1  | 717.5309 | C39 H76 O8 N1 P1  |
| PE(18:0/20:4)  | 18:0/20:4  | 767.5465 | C43 H78 O8 N1 P1  |
| PE(42:3)       | 42:03:00   | 825.6248 | C47 H88 O8 N1 P1  |
| PE(42:3p)      | 42:3p      | 809.6298 | C47 H88 O7 N1 P1  |
| PE(44:6)       | 44:06:00   | 847.6091 | C49 H86 O8 N1 P1  |
| PI(16:0/18:1)  | 16:0/18:1  | 836.5415 | C43 H81 O13 N0 P1 |
| PI(16:1)       | 16:01      | 584.2598 | C25 H45 O13 N0 P1 |
| PI(27:3)       | 27:03:00   | 734.4006 | C36 H63 O13 N0 P1 |
| PI(32:8)       | 32:08:00   | 794.4006 | C41 H63 O13 N0 P1 |
| PI(38:8)       | 38:08:00   | 878.4945 | C47 H75 O13 N0 P1 |
| PI(38:9)       | 38:09:00   | 876.4789 | C47 H73 O13 N0 P1 |
| PI(40:7)       | 40:07:00   | 908.5415 | C49 H81 O13 N0 P1 |
| PI(40:8)       | 40:08:00   | 906.5258 | C49 H79 O13 N0 P1 |
| PI(16:0/20:4)  | 16:0/20:4  | 858.5258 | C45 H79 O13 N0 P1 |
| PI(18:0/20:4)  | 18:0/20:4  | 886.5571 | C47 H83 O13 N0 P1 |
| PI(18:1/20:4)  | 18:1/20:4  | 884.5415 | C47 H81 O13 N0 P1 |
| PI(31:1p)      | 31:1p      | 778.4996 | C40 H75 O12 N0 P1 |
| PI(32:1p)      | 32:1p      | 792.5153 | C41 H77 O12 N0 P1 |
| PI(34:3p)      | 34:3p      | 816.5153 | C43 H77 O12 N0 P1 |
| PI(34:6p)      | 34:6p      | 810.4683 | C43 H71 O12 N0 P1 |
| PI(38:8)       | 38:08:00   | 878.4945 | C47 H75 O13 N0 P1 |
| PI(39:1p)      | 39:1p      | 890.6248 | C48 H91 O12 N0 P1 |
| PS(18:0/20:4)  | 18:0/20:4  | 811.5363 | C44 H78 O10 N1 P1 |
| PS(18:0/22:4)  | 18:0/22:4  | 839.5676 | C46 H82 O10 N1 P1 |
| PS(18:1/20:4)  | 18:1/20:4  | 809.5207 | C44 H76 O10 N1 P1 |
| PS(21:3)       | 21:03      | 575.2859 | C27 H46 O10 N1 P1 |
| PS(21:3)       | 21:03      | 575.2859 | C27 H46 O10 N1 P1 |
| PS(21:3)       | 21:03      | 575.2859 | C27 H46 O10 N1 P1 |
| PS(23:0)       | 23:00      | 609.3642 | C29 H56 O10 N1 P1 |
| PS(23:0)       | 23:00      | 609.3642 | C29 H56 O10 N1 P1 |
| PS(28:0p)      | 28:0p      | 663.4475 | C34 H66 O9 N1 P1  |
| PS(32:0)       | 32:00:00   | 735.505  | C38 H74 O10 N1 P1 |
| PS(32:1)       | 32:01:00   | 733.4894 | C38 H72 O10 N1 P1 |

|                |            |          |                   |
|----------------|------------|----------|-------------------|
| PS(33:7)       | 33:07:00   | 735.4111 | C39 H62 O10 N1 P1 |
| PS(39:1)       | 39:01:00   | 831.5989 | C45 H86 O10 N1 P1 |
| PS(16:0/18:1)  | 16:0/18:1  | 761.5207 | C40 H76 O10 N1 P1 |
| PS(18:0/18:1)  | 18:0/18:1  | 789.552  | C42 H80 O10 N1 P1 |
| PS(18:0/20:1)  | 18:0/20:1  | 817.5833 | C44 H84 O10 N1 P1 |
| PS(18:0/22:6)  | 18:0/22:6  | 835.5363 | C46 H78 O10 N1 P1 |
| PS(18:1/18:1)  | 18:1/18:1  | 787.5363 | C42 H78 O10 N1 P1 |
| PS(18:1/22:0)  | 18:1/22:0  | 845.6146 | C46 H88 O10 N1 P1 |
| PS(18:1/22:1)  | 18:1/22:1  | 843.5989 | C46 H86 O10 N1 P1 |
| PS(18:1/23:0)  | 18:1/23:0  | 859.6302 | C47 H90 O10 N1 P1 |
| PS(18:1/24:0)  | 18:1/24:0  | 873.6459 | C48 H92 O10 N1 P1 |
| PS(18:1/24:1)  | 18:1/24:1  | 871.6302 | C48 H90 O10 N1 P1 |
| PS(20:1/18:1)  | 20:1/18:1  | 815.5676 | C44 H82 O10 N1 P1 |
| PS(16:0p/18:1) | 16:0p/18:1 | 745.5258 | C40 H76 O9 N1 P1  |
| PS(29:0)       | 29:00:00   | 693.4581 | C35 H68 O10 N1 P1 |
| PS(21:3)       | 21:03      | 575.2859 | C27 H46 O10 N1 P1 |
| PS(21:3)       | 21:03      | 575.2859 | C27 H46 O10 N1 P1 |
| PS(21:3)       | 21:03      | 575.2859 | C27 H46 O10 N1 P1 |
| PS(21:3)       | 21:03      | 575.2859 | C27 H46 O10 N1 P1 |
| PS(21:3)       | 21:03      | 575.2859 | C27 H46 O10 N1 P1 |
| PS(23:0)       | 23:00      | 609.3642 | C29 H56 O10 N1 P1 |
| PS(29:3)       | 29:03:00   | 687.4111 | C35 H62 O10 N1 P1 |
| PS(30:4)       | 30:04:00   | 699.4111 | C36 H62 O10 N1 P1 |
| PS(32:4e)      | 32:4e      | 713.4632 | C38 H68 O9 N1 P1  |
| PS(33:7)       | 33:07:00   | 735.4111 | C39 H62 O10 N1 P1 |
| PS(39:4)       | 39:04:00   | 825.552  | C45 H80 O10 N1 P1 |
| PS(39:4)       | 39:04:00   | 825.552  | C45 H80 O10 N1 P1 |
| PS(45:6)       | 45:06:00   | 905.6146 | C51 H88 O10 N1 P1 |

❖Lipid identification and relative quantification were performed using LipidSearch 4.1 software (Thermo). The search criteria were as follows: product search; parent m/z tolerance 5 ppm; product m/z tolerance 5 ppm; quantification: m/z tolerance 5 ppm, retention time tolerance 1 min.

### Supplemental Table 3: Phospholipid Class Comparison

| Lipid Class❖ | Control |                |              | Glaucoma |                |             | p-Value* |
|--------------|---------|----------------|--------------|----------|----------------|-------------|----------|
|              | Mean    | Std. Deviation | 95% CI       | Mean     | Std. Deviation | 95% CI      |          |
| PC           | 37.39   | 0.67           | 36.94-37.84  | 35.77    | 3.21           | 33.74-37.81 | 1.17E-01 |
| PE           | 35.21   | 0.48           | 34.88-35.52  | 34.94    | 2.77           | 33.18-36.70 | 7.63E-01 |
| PI           | 29.75   | 1.25           | 28.91- 30.59 | 29.56    | 0.98           | 28.94-30.18 | 6.98E-01 |
| PS           | 33.37   | 0.61           | 32.96-33.78  | 32.81    | 1.42           | 31.91-33.71 | 2.37E-01 |

❖Lipid identification and relative quantification were performed using LipidSearch 4.1 software (Thermo). The search criteria were as follows: product search; parent m/z tolerance 5 ppm; product m/z tolerance 5ppm; quantification: m/z tolerance 5 ppm, retention time tolerance 0.5 min. T-test results (\*p-values). Data presented has been log2 transformed.

**Supplemental Table 4: Lipid Class Comparisons**

| Lipid Class❖           | Mean           |                 | Std. deviation |                 | 95% CI Difference | *p-value |
|------------------------|----------------|-----------------|----------------|-----------------|-------------------|----------|
|                        | <i>Control</i> | <i>Glaucoma</i> | <i>Control</i> | <i>Glaucoma</i> |                   |          |
| Ceramides              | 31.83          | 32.18           | 6.05           | 4.28            | -1.21 - 1.91      | 6.59E-01 |
| Glucosylsphingosine    | 30.20          | 30.97           | 0.37           | 0.49            | 0.40 - 1.16       | 4.00E-04 |
| Phospholipids          | 33.93          | 33.71           | 2.94           | 3.04            | -1.49 - 1.05      | 7.33E-01 |
| Sphingomyelin          | 36.90          | 36.12           | 0.71           | 1.57            | -1.87 - 0.30      | 3.00E-01 |
| Sphingoid Base/S1P     | 19.56          | 19.14           | 3.13           | 2.67            | -3.00 - 2.17      | 7.50E-01 |
| FA Chain Length: >24   | 40.56          | 39.69           | 0.46           | 0.46            | -0.37 - 2.12      | 1.59E-01 |
| FA Chain Length: 12-24 | 38.58          | 37.30           | 0.69           | 2.26            | - 0.21 - 2.77     | 8.72E-02 |
| FA Chain Length: <12   | 25.64          | 25.29           | 4.57           | 4.47            | -4.00 - 3.31      | 8.46E-01 |
| Total Lipid            | 1717.00        | 1685.00         | 54.80          | 142.30          | -127 - 63.2       | 9.00E-01 |

❖Lipid identification and relative quantification were performed using LipidSearch 4.1 software (Thermo). The search criteria were as follows: product search; parent m/z tolerance 5 ppm; product m/z tolerance 5ppm; quantification: m/z tolerance 5 ppm, retention time tolerance 0.5 min. \*p-values from t-tests and Wilcoxon rank-sum. Data presented has been log2 transformed.

**Supplemental Table 5: Multiple Regression of Glucosylsphingosine Peak Intensity**

| Model      | Unstandardized Coefficients❖ |            | Standardized Coefficients | t     | p-value | 95% CI for B |             |
|------------|------------------------------|------------|---------------------------|-------|---------|--------------|-------------|
|            | B                            | Std. Error | Beta                      |       |         | Lower Bound  | Upper Bound |
| (Constant) | 28.81                        | 1.22       |                           | 23.56 | 0.000   | 26.25        | 31.37       |
| Age        | 0.007                        | 0.0133     | 0.103                     | 0.53  | 0.602   | -0.02        | 0.03        |
| Gender     | 0.058                        | 0.228      | 0.049                     | 0.26  | 0.799   | -0.42        | 0.53        |
| Disease    | 0.784                        | 0.192      | 0.687                     | 4.07  | 0.001 * | 0.38         | 1.19        |

❖Dependent variable: Glucosylsphingosine peak intensity. Predictors: (constant), age, gender, and disease state (control/glaucoma). R2 = 0.47.



**Supplemental Table 6: Species Level Details for Ceramides, Sphingomyelins, Sphingosines, and Glucosylsphingosine**

| Lipid Species✦     | m/z   | Mean    |          | Standard deviation |          | Minimum |          | Maximum |          | Fold Change | Glaucoma /Control | *p-value |
|--------------------|-------|---------|----------|--------------------|----------|---------|----------|---------|----------|-------------|-------------------|----------|
|                    |       | Control | Glaucoma | Control            | Glaucoma | Control | Glaucoma | Control | Glaucoma |             |                   |          |
| Cer(d16:0+pO)      | 303.2 | 24.43   | 26.49    | 1.09               | 2.31     | 23.19   | 24.00    | 26.69   | 32.14    | 1.08        | Up                | 1.34E-02 |
| Cer(d16:1/22:1)    | 591.6 | 22.48   | 23.95    | 2.38               | 2.27     | 18.25   | 18.25    | 24.57   | 25.97    | 1.07        | Up                | 7.93E-02 |
| Cer(d16:1+hO)      | 301.2 | 10.79   | 15.36    | 5.30               | 0.94     | 2.63    | 14.75    | 15.42   | 18.25    | 1.42        | Up                | 3.40E-03 |
| Cer(d17:0+pO/33:1) | 777.8 | 10.43   | 24.08    | 9.92               | 1.70     | 2.63    | 21.80    | 23.74   | 27.04    | 2.31        | Up                | 2.20E-03 |
| Cer(d17:0+pO/35:2) | 803.8 | 24.05   | 25.71    | 1.19               | 1.72     | 21.57   | 23.65    | 25.78   | 28.47    | 1.07        | Up                | 1.43E-02 |
| Cer(d17:0+pO/35:3) | 801.8 | 22.80   | 15.36    | 1.25               | 0.94     | 20.43   | 14.75    | 24.40   | 18.25    | -1.48       | Down              | 1.00E-04 |
| Cer(d17:0+pO/37:2) | 831.8 | 10.58   | 24.17    | 10.14              | 1.91     | 2.63    | 22.11    | 24.49   | 27.20    | 2.29        | Up                | 4.90E-03 |
| Cer(d18:0/24:0)    | 651.7 | 22.45   | 24.43    | 3.41               | 2.40     | 18.68   | 18.25    | 26.93   | 26.51    | 1.09        | Up                | 5.25E-01 |
| Cer(d18:0/24:0+O)  | 667.6 | 11.30   | 24.87    | 11.13              | 2.45     | 2.63    | 18.25    | 26.21   | 26.56    | 2.2         | Up                | 4.00E-03 |
| Cer(d18:0/24:1)    | 649.6 | 24.42   | 27.61    | 3.86               | 1.05     | 17.39   | 25.88    | 27.44   | 29.27    | 1.13        | Up                | 4.20E-02 |
| Cer(d18:0/50:2EO)  | 1042  | 11.44   | 15.36    | 9.34               | 0.94     | 2.63    | 14.75    | 22.50   | 18.25    | 1.34        | Up                | 6.88E-01 |
| Cer(d18:0/52:2EO)  | 1070  | 10.80   | 15.36    | 8.80               | 0.94     | 2.63    | 14.75    | 22.14   | 18.25    | 1.42        | Up                | 2.80E-01 |
| Cer(d18:0+pO)      | 331.3 | 17.99   | 23.55    | 2.89               | 1.70     | 12.61   | 21.16    | 21.42   | 28.07    | 1.31        | Up                | 1.00E-04 |
| Cer(d18:0+pO/18:0) | 583.6 | 26.63   | 28.49    | 2.81               | 1.13     | 21.48   | 26.05    | 29.76   | 29.96    | 1.07        | Up                | 6.88E-02 |
| Cer(d18:0+pO/18:1) | 581.5 | 23.75   | 23.85    | 0.85               | 2.24     | 21.94   | 18.25    | 25.11   | 26.34    | 1           | Up                | 8.87E-01 |
| Cer(d18:0+pO/22:0) | 639.6 | 26.27   | 26.71    | 0.81               | 2.74     | 24.79   | 18.25    | 27.87   | 28.57    | 1.02        | Up                | 7.00E-03 |
| Cer(d18:0+pO/23:0) | 653.6 | 23.54   | 25.11    | 2.89               | 2.30     | 18.93   | 18.25    | 26.13   | 27.10    | 1.07        | Up                | 3.56E-01 |
| Cer(d18:0+pO/23:1) | 651.6 | 24.45   | 15.36    | 1.48               | 0.94     | 22.22   | 14.75    | 27.31   | 18.25    | -1.59       | Down              | 1.00E-04 |
| Cer(d18:0+pO/24:0) | 667.6 | 27.23   | 28.43    | 0.98               | 1.04     | 25.46   | 26.70    | 28.48   | 29.76    | 1.04        | Up                | 9.50E-03 |
| Cer(d18:0+pO/24:1) | 665.6 | 30.27   | 28.62    | 0.70               | 1.68     | 29.20   | 24.73    | 32.02   | 30.51    | -1.06       | Down              | 7.20E-03 |
| Cer(d18:0+pO/25:1) | 679.6 | 27.57   | 26.39    | 1.16               | 1.67     | 24.52   | 22.78    | 29.22   | 28.37    | -1.04       | Down              | 4.39E-02 |
| Cer(d18:0+pO/26:1) | 693.7 | 26.18   | 15.36    | 1.36               | 0.94     | 22.81   | 14.75    | 27.61   | 18.25    | -1.7        | Down              | 1.00E-04 |
| Cer(d18:0+pO/26:2) | 691.6 | 24.77   | 25.27    | 2.94               | 2.65     | 18.39   | 18.25    | 27.09   | 27.66    | 1.02        | Up                | 8.33E-01 |
| Cer(d18:0+pO/36:3) | 829.8 | 12.81   | 15.36    | 9.35               | 0.94     | 2.63    | 14.75    | 24.43   | 18.25    | 1.2         | Up                | 8.53E-01 |
| Cer(d18:1)         | 313.3 | 21.89   | 23.33    | 3.21               | 2.08     | 18.47   | 21.27    | 28.30   | 27.88    | 1.07        | Up                | 2.12E-01 |
| Cer(d18:1/16:0)    | 537.5 | 25.01   | 27.31    | 2.29               | 0.92     | 20.04   | 25.29    | 27.65   | 28.65    | 1.09        | Up                | 8.40E-03 |
| Cer(d18:1/18:0)    | 565.5 | 29.09   | 27.92    | 0.53               | 3.24     | 28.35   | 18.25    | 29.90   | 30.01    | -1.04       | Down              | 6.44E-01 |
| Cer(d18:1/18:1)    | 563.5 | 24.85   | 24.22    | 1.13               | 2.30     | 23.88   | 18.25    | 27.44   | 26.58    | -1.03       | Down              | 9.75E-01 |
| Cer(d18:1/20:0)    | 593.6 | 26.54   | 26.61    | 0.44               | 2.73     | 25.45   | 18.25    | 27.14   | 28.35    | 1           | Up                | 2.68E-02 |
| Cer(d18:1/22:0)    | 621.6 | 26.35   | 26.71    | 0.63               | 2.74     | 25.49   | 18.25    | 27.89   | 28.48    | 1.01        | Up                | 5.60E-03 |

|                    |       |       |       |      |      |       |       |       |       |       |      |          |
|--------------------|-------|-------|-------|------|------|-------|-------|-------|-------|-------|------|----------|
| Cer(d18:1/22:1)    | 619.6 | 26.04 | 25.61 | 1.16 | 2.74 | 22.71 | 18.25 | 26.85 | 27.66 | -1.02 | Down | 6.08E-01 |
| Cer(d18:1/23:0)    | 635.6 | 26.18 | 25.80 | 1.08 | 2.51 | 23.74 | 18.25 | 28.37 | 27.97 | -1.01 | Down | 9.02E-01 |
| Cer(d18:1/23:1)    | 633.6 | 27.09 | 27.55 | 0.51 | 1.58 | 26.07 | 23.70 | 28.07 | 29.14 | 1.02  | Up   | 3.58E-01 |
| Cer(d18:1/24:0)    | 649.6 | 26.33 | 15.36 | 0.81 | 0.94 | 25.45 | 14.75 | 28.59 | 18.25 | -1.71 | Down | 1.00E-04 |
| Cer(d18:1/24:0+O)  | 665.6 | 17.69 | 23.38 | 8.72 | 1.82 | 2.63  | 18.25 | 24.44 | 25.46 | 1.32  | Up   | 9.05E-02 |
| Cer(d18:1/24:1)    | 647.6 | 30.56 | 29.40 | 0.98 | 1.84 | 29.16 | 25.58 | 32.77 | 31.51 | -1.04 | Down | 7.78E-02 |
| Cer(d18:1/24:2)    | 645.6 | 28.13 | 28.07 | 0.44 | 1.74 | 27.60 | 25.18 | 28.88 | 30.30 | -1    | Down | 9.17E-01 |
| Cer(d18:1/25:0)    | 663.7 | 24.76 | 15.36 | 2.12 | 0.94 | 19.19 | 14.75 | 27.19 | 18.25 | -1.61 | Down | 1.00E-04 |
| Cer(d18:1/25:1)    | 661.6 | 27.89 | 25.98 | 0.78 | 3.10 | 26.32 | 18.25 | 29.58 | 29.36 | -1.07 | Down | 5.92E-02 |
| Cer(d18:1/26:1)    | 675.7 | 26.71 | 25.83 | 1.32 | 2.97 | 23.45 | 18.25 | 28.87 | 28.62 | -1.03 | Down | 7.86E-01 |
| Cer(d18:1/26:2)    | 673.6 | 26.54 | 26.61 | 0.73 | 3.12 | 25.30 | 18.25 | 27.56 | 29.10 | 1     | Up   | 2.55E-01 |
| Cer(d18:1/52:2EO)  | 1068  | 12.80 | 15.36 | 9.24 | 0.94 | 2.63  | 14.75 | 23.71 | 18.25 | 1.2   | Up   | 9.26E-01 |
| Cer(d18:1/56:2EO)  | 1124  | 10.99 | 15.36 | 8.80 | 0.94 | 2.63  | 14.75 | 22.13 | 18.25 | 1.4   | Up   | 6.88E-01 |
| Cer(d18:1+hO)      | 329.3 | 16.84 | 22.90 | 2.54 | 1.84 | 13.07 | 20.91 | 22.85 | 27.35 | 1.36  | Up   | 1.00E-04 |
| Cer(d18:1+hO/24:1) | 663.6 | 26.93 | 26.83 | 2.85 | 2.81 | 19.52 | 18.25 | 29.32 | 28.59 | -1    | Down | 5.59E-01 |
| Cer(d18:2/18:0)    | 563.5 | 22.95 | 26.10 | 4.07 | 2.69 | 15.50 | 18.25 | 27.95 | 29.22 | 1.14  | Up   | 8.60E-03 |
| Cer(d18:2/18:1)    | 561.5 | 18.80 | 15.36 | 5.72 | 0.94 | 2.63  | 14.75 | 22.26 | 18.25 | -1.22 | Down | 1.90E-03 |
| Cer(d18:2/24:1)    | 645.6 | 22.76 | 26.01 | 4.67 | 2.58 | 14.98 | 18.25 | 26.58 | 27.71 | 1.14  | Up   | 1.56E-02 |
| Cer(d18:2/25:1)    | 659.6 | 18.43 | 15.36 | 6.49 | 0.94 | 2.63  | 14.75 | 23.00 | 18.25 | -1.2  | Down | 1.32E-01 |
| Cer(d19:0)         | 329.3 | 18.27 | 20.71 | 3.63 | 4.61 | 12.76 | 15.00 | 25.35 | 27.13 | 1.13  | Up   | 1.77E-01 |
| Cer(d19:1+hO)      | 343.3 | 17.30 | 22.95 | 1.43 | 1.62 | 14.25 | 21.59 | 18.50 | 27.95 | 1.33  | Up   | 1.00E-04 |
| Cer(d20:0+pO)      | 359.3 | 22.47 | 24.51 | 1.70 | 0.92 | 18.53 | 23.01 | 24.52 | 25.91 | 1.09  | Up   | 1.60E-03 |
| Cer(d20:1)         | 341.3 | 22.43 | 25.18 | 1.43 | 1.10 | 20.88 | 23.53 | 24.08 | 27.01 | 1.12  | Up   | 2.00E-04 |
| Cer(d20:1+hO)      | 357.3 | 26.15 | 27.37 | 1.09 | 0.70 | 25.00 | 25.79 | 27.47 | 28.23 | 1.05  | Up   | 6.70E-03 |
| Cer(d20:2)         | 339.3 | 26.21 | 24.16 | 1.15 | 2.88 | 25.00 | 21.27 | 27.69 | 28.27 | -1.08 | Down | 1.34E-01 |
| Cer(d21:0)         | 357.3 | 16.15 | 23.08 | 1.92 | 2.41 | 13.46 | 21.09 | 19.65 | 30.19 | 1.43  | Up   | 1.00E-04 |
| Cer(d21:0+pO)      | 373.3 | 19.62 | 23.65 | 0.96 | 2.22 | 18.27 | 21.42 | 21.11 | 29.47 | 1.21  | Up   | 1.00E-04 |
| Cer(d21:1)         | 355.3 | 19.10 | 20.44 | 2.69 | 2.66 | 15.89 | 15.15 | 23.82 | 23.21 | 1.07  | Up   | 1.86E-01 |
| Cer(d21:1+hO)      | 371.3 | 18.26 | 15.36 | 1.79 | 0.94 | 15.31 | 14.75 | 20.44 | 18.25 | -1.19 | Down | 1.00E-04 |
| Cer(d22:0)         | 371.3 | 20.60 | 15.36 | 1.36 | 0.94 | 19.38 | 14.75 | 24.16 | 18.25 | -1.34 | Down | 1.00E-04 |
| Cer(d22:0+pO)      | 387.3 | 21.37 | 24.32 | 1.04 | 1.36 | 19.84 | 23.36 | 23.22 | 28.42 | 1.14  | Up   | 1.00E-04 |
| Cer(d22:1)         | 369.3 | 17.55 | 15.36 | 2.69 | 0.94 | 13.51 | 14.75 | 23.28 | 18.25 | -1.14 | Down | 2.68E-02 |
| Cer(d22:1+hO)      | 385.3 | 24.90 | 26.98 | 1.23 | 0.51 | 23.39 | 26.19 | 26.73 | 27.69 | 1.08  | Up   | 2.00E-04 |
| Cer(d22:2)         | 367.3 | 25.14 | 26.51 | 1.13 | 3.68 | 24.03 | 22.50 | 27.01 | 32.14 | 1.05  | Up   | 2.41E-01 |
| Cer(d23:1)         | 383.3 | 12.76 | 19.36 | 5.33 | 3.83 | 2.63  | 14.75 | 19.69 | 25.25 | 1.52  | Up   | 1.50E-03 |
| Cer(d24:1+hO)      | 413.4 | 22.16 | 23.57 | 1.30 | 1.03 | 20.12 | 22.16 | 23.82 | 25.85 | 1.06  | Up   | 8.40E-03 |
| Cer(d24:2)         | 395.3 | 22.33 | 25.08 | 1.58 | 3.79 | 19.95 | 21.25 | 24.82 | 31.40 | 1.12  | Up   | 1.03E-01 |
| Cer(d25:0+pO)      | 429.4 | 17.37 | 24.74 | 1.41 | 2.16 | 15.22 | 22.84 | 19.03 | 30.60 | 1.42  | Up   | 1.00E-04 |

|                  |       |       |       |       |      |       |       |       |       |       |      |          |
|------------------|-------|-------|-------|-------|------|-------|-------|-------|-------|-------|------|----------|
| Cer(d25:1)       | 411.4 | 18.43 | 20.87 | 2.30  | 3.63 | 15.89 | 14.86 | 22.88 | 25.22 | 1.13  | Up   | 9.05E-02 |
| Cer(d26:0)       | 427.4 | 18.07 | 22.25 | 5.40  | 1.47 | 2.63  | 18.25 | 21.50 | 24.27 | 1.23  | Up   | 5.00E-04 |
| Cer(d26:2)       | 423.4 | 18.99 | 25.11 | 5.12  | 3.79 | 5.89  | 18.25 | 24.75 | 30.85 | 1.32  | Up   | 2.20E-03 |
| Cer(d27:0+O)     | 457.4 | 23.89 | 25.08 | 3.11  | 2.37 | 18.27 | 21.91 | 28.50 | 28.41 | 1.05  | Up   | 3.12E-01 |
| Cer(d27:1)       | 439.4 | 24.01 | 25.05 | 3.08  | 2.36 | 18.28 | 21.88 | 28.65 | 28.40 | 1.04  | Up   | 3.68E-01 |
| Cer(d28:0)       | 455.4 | 18.84 | 22.93 | 8.48  | 3.22 | 2.63  | 14.95 | 24.41 | 26.19 | 1.22  | Up   | 2.81E-01 |
| Cer(d28:1)       | 453.4 | 11.86 | 15.36 | 6.91  | 0.94 | 2.63  | 14.75 | 19.06 | 18.25 | 1.3   | Up   | 6.01E-01 |
| Cer(d29:0+pO)    | 485.4 | 23.20 | 24.81 | 2.95  | 2.23 | 18.39 | 21.96 | 27.58 | 27.87 | 1.07  | Up   | 1.52E-01 |
| Cer(d29:1)       | 467.4 | 23.41 | 24.81 | 2.88  | 2.23 | 18.40 | 21.96 | 27.68 | 27.86 | 1.06  | Up   | 2.04E-01 |
| Cer(d29:1+pO+2O) | 515.4 | 9.78  | 15.36 | 6.50  | 0.94 | 2.63  | 14.75 | 19.54 | 18.25 | 1.57  | Up   | 1.75E-02 |
| Cer(d29:2)       | 465.4 | 17.38 | 19.27 | 4.63  | 3.93 | 5.89  | 14.86 | 22.73 | 24.77 | 1.11  | Up   | 6.08E-01 |
| Cer(d29:2+hO)    | 481.4 | 12.91 | 17.83 | 6.32  | 3.55 | 2.63  | 14.86 | 19.95 | 23.30 | 1.38  | Up   | 1.50E-02 |
| Cer(d30:0+pO+2O) | 531.4 | 25.16 | 15.36 | 3.97  | 0.94 | 18.34 | 14.75 | 29.32 | 18.25 | -1.64 | Down | 1.00E-04 |
| Cer(d30:3)       | 477.4 | 7.41  | 19.86 | 9.51  | 5.28 | 2.63  | 15.00 | 26.99 | 27.47 | 2.68  | Up   | 6.60E-03 |
| Cer(d30:4)       | 475.4 | 15.97 | 15.36 | 7.44  | 0.94 | 2.63  | 14.75 | 24.90 | 18.25 | -1.04 | Down | 5.38E-01 |
| Cer(d30:4+pO)    | 491.4 | 15.70 | 22.93 | 7.20  | 3.27 | 2.63  | 15.00 | 26.60 | 27.60 | 1.46  | Up   | 8.70E-03 |
| Cer(d31:1)       | 495.5 | 9.65  | 17.78 | 7.74  | 3.46 | 2.63  | 14.86 | 19.93 | 23.04 | 1.84  | Up   | 1.22E-02 |
| Cer(d31:1+pO+2O) | 543.4 | 19.73 | 23.39 | 1.56  | 2.40 | 16.79 | 18.25 | 22.97 | 27.33 | 1.19  | Up   | 3.00E-04 |
| Cer(d31:3)       | 491.4 | 13.15 | 22.94 | 7.81  | 5.45 | 2.63  | 14.75 | 23.65 | 32.02 | 1.74  | Up   | 2.10E-03 |
| Cer(d31:4)       | 489.4 | 15.27 | 21.71 | 5.91  | 2.60 | 2.63  | 14.95 | 21.60 | 23.77 | 1.42  | Up   | 3.00E-04 |
| Cer(d31:4+pO)    | 505.4 | 15.99 | 18.49 | 4.30  | 3.75 | 5.89  | 14.86 | 20.92 | 23.96 | 1.16  | Up   | 3.89E-01 |
| Cer(d32:0+pO+2O) | 559.5 | 28.55 | 15.36 | 1.13  | 0.94 | 26.48 | 14.75 | 30.47 | 18.25 | -1.86 | Down | 1.00E-04 |
| Cer(d32:1)       | 509.5 | 15.04 | 23.16 | 7.06  | 1.78 | 2.63  | 18.25 | 22.17 | 25.23 | 1.54  | Up   | 2.00E-04 |
| Cer(d32:1+pO+2O) | 557.5 | 30.49 | 31.88 | 0.83  | 1.22 | 29.38 | 29.94 | 32.35 | 33.63 | 1.05  | Up   | 4.70E-03 |
| Cer(d32:3)       | 505.4 | 18.01 | 22.57 | 10.89 | 6.64 | 2.63  | 15.11 | 30.22 | 31.51 | 1.25  | Up   | 4.06E-01 |
| Cer(d32:3+hO+2O) | 553.4 | 21.06 | 24.95 | 1.48  | 1.96 | 19.45 | 23.00 | 23.84 | 30.35 | 1.18  | Up   | 1.00E-04 |
| Cer(d32:5)       | 501.4 | 17.09 | 20.92 | 4.31  | 3.03 | 5.89  | 15.07 | 21.98 | 23.72 | 1.22  | Up   | 2.25E-02 |
| Cer(d33:1+pO+2O) | 571.5 | 19.08 | 24.34 | 2.31  | 1.79 | 17.08 | 22.29 | 24.03 | 28.16 | 1.28  | Up   | 1.00E-04 |
| Cer(d34:0)       | 539.5 | 8.95  | 21.50 | 8.81  | 4.37 | 2.63  | 15.00 | 26.08 | 27.06 | 2.4   | Up   | 4.00E-03 |
| Cer(d34:0+O)     | 555.5 | 22.44 | 25.65 | 2.26  | 3.03 | 19.14 | 21.59 | 26.37 | 30.25 | 1.14  | Up   | 9.50E-03 |
| Cer(d34:0+pO)    | 555.5 | 26.79 | 26.63 | 0.76  | 2.85 | 26.02 | 18.25 | 28.46 | 28.81 | -1.01 | Down | 3.56E-01 |
| Cer(d34:0+pO+2O) | 587.5 | 26.40 | 26.67 | 0.76  | 1.16 | 25.43 | 25.08 | 27.94 | 29.10 | 1.01  | Up   | 5.17E-01 |
| Cer(d34:1)       | 537.5 | 26.50 | 19.21 | 1.51  | 5.50 | 24.79 | 14.97 | 28.67 | 28.55 | -1.38 | Down | 8.90E-03 |
| Cer(d34:1+hO)    | 553.5 | 19.66 | 23.91 | 6.13  | 2.03 | 2.63  | 18.25 | 23.98 | 25.84 | 1.22  | Up   | 2.80E-03 |
| Cer(d34:2)       | 535.5 | 19.48 | 23.85 | 6.05  | 2.02 | 2.63  | 18.25 | 24.02 | 25.81 | 1.22  | Up   | 2.30E-03 |
| Cer(d34:2+pO+2O) | 583.5 | 27.32 | 23.96 | 2.83  | 3.98 | 22.46 | 15.07 | 30.22 | 30.15 | -1.14 | Down | 3.63E-02 |
| Cer(d34:3)       | 533.5 | 20.45 | 24.53 | 4.64  | 2.77 | 12.13 | 21.20 | 26.95 | 29.04 | 1.2   | Up   | 1.73E-02 |
| Cer(d34:3+hO+2O) | 581.5 | 24.71 | 27.89 | 3.58  | 2.00 | 19.37 | 24.93 | 28.07 | 30.51 | 1.13  | Up   | 5.95E-02 |

|                  |       |       |       |      |      |       |       |       |       |       |      |          |
|------------------|-------|-------|-------|------|------|-------|-------|-------|-------|-------|------|----------|
| Cer(d35:0)       | 553.5 | 17.69 | 22.94 | 5.26 | 2.81 | 5.89  | 15.59 | 25.25 | 26.44 | 1.3   | Up   | 6.50E-03 |
| Cer(d35:0+O)     | 569.5 | 19.21 | 23.50 | 2.64 | 2.19 | 16.72 | 21.23 | 22.93 | 28.63 | 1.22  | Up   | 4.50E-03 |
| Cer(d35:1+hO+O)  | 583.5 | 25.03 | 27.99 | 1.70 | 2.74 | 23.12 | 23.75 | 28.69 | 33.63 | 1.12  | Up   | 5.80E-03 |
| Cer(d35:1+pO+2O) | 599.5 | 17.03 | 26.02 | 5.65 | 2.14 | 2.63  | 23.25 | 24.23 | 31.14 | 1.53  | Up   | 1.00E-04 |
| Cer(d35:2+hO)    | 565.5 | 19.42 | 27.10 | 6.40 | 2.65 | 5.89  | 23.22 | 28.57 | 32.55 | 1.4   | Up   | 2.60E-03 |
| Cer(d35:2+pO+2O) | 597.5 | 12.94 | 15.36 | 7.81 | 0.94 | 2.63  | 14.75 | 22.06 | 18.25 | 1.19  | Up   | 8.29E-01 |
| Cer(d35:3)       | 547.5 | 25.03 | 27.96 | 1.68 | 2.78 | 23.13 | 23.75 | 28.63 | 33.46 | 1.12  | Up   | 6.40E-03 |
| Cer(d36:0)       | 567.6 | 21.69 | 26.86 | 3.97 | 2.85 | 16.50 | 18.25 | 29.36 | 29.04 | 1.24  | Up   | 1.88E-02 |
| Cer(d36:0+O)     | 583.6 | 20.56 | 26.29 | 3.52 | 2.84 | 13.03 | 22.81 | 24.12 | 30.45 | 1.28  | Up   | 3.00E-04 |
| Cer(d36:0+pO)    | 583.6 | 27.78 | 25.68 | 0.55 | 1.49 | 26.85 | 23.40 | 29.07 | 27.73 | -1.08 | Down | 4.00E-04 |
| Cer(d36:0+pO+O)  | 599.5 | 20.08 | 15.36 | 1.35 | 0.94 | 17.08 | 14.75 | 21.80 | 18.25 | -1.31 | Down | 1.00E-04 |
| Cer(d36:1)       | 565.5 | 22.56 | 23.19 | 1.16 | 3.02 | 21.00 | 15.07 | 25.07 | 26.44 | 1.03  | Up   | 1.18E-01 |
| Cer(d36:1+hO)    | 581.5 | 24.85 | 26.08 | 2.47 | 2.68 | 18.88 | 18.25 | 28.05 | 29.16 | 1.05  | Up   | 5.25E-02 |
| Cer(d36:1+hO+2O) | 613.5 | 24.89 | 15.36 | 1.92 | 0.94 | 20.80 | 14.75 | 27.52 | 18.25 | -1.62 | Down | 1.00E-04 |
| Cer(d36:2+hO+2O) | 611.5 | 21.48 | 15.36 | 1.95 | 0.94 | 18.28 | 14.75 | 24.60 | 18.25 | -1.4  | Down | 1.00E-04 |
| Cer(d36:3)       | 561.5 | 19.55 | 21.18 | 8.21 | 6.92 | 2.63  | 15.00 | 29.82 | 31.06 | 1.08  | Up   | 6.44E-01 |
| Cer(d36:3+hO+2O) | 609.5 | 27.01 | 29.34 | 1.23 | 1.10 | 25.73 | 26.97 | 28.65 | 30.82 | 1.09  | Up   | 8.00E-04 |
| Cer(d37:0)       | 581.6 | 18.30 | 15.36 | 5.02 | 0.94 | 5.89  | 14.75 | 24.71 | 18.25 | -1.19 | Down | 1.70E-03 |
| Cer(d37:0+O)     | 597.6 | 20.72 | 24.46 | 2.53 | 2.36 | 17.87 | 21.61 | 24.44 | 29.38 | 1.18  | Up   | 8.60E-03 |
| Cer(d37:1+hO+O)  | 611.5 | 24.41 | 26.73 | 1.05 | 2.77 | 22.38 | 22.90 | 25.53 | 31.45 | 1.09  | Up   | 1.70E-02 |
| Cer(d37:2+hO+O)  | 609.5 | 21.25 | 25.72 | 0.83 | 2.83 | 19.67 | 21.61 | 22.26 | 30.88 | 1.21  | Up   | 2.00E-04 |
| Cer(d37:4+pO)    | 589.5 | 8.99  | 15.36 | 9.10 | 0.94 | 2.63  | 14.75 | 24.49 | 18.25 | 1.71  | Up   | 2.01E-01 |
| Cer(d37:5)       | 571.5 | 8.96  | 15.36 | 9.07 | 0.94 | 2.63  | 14.75 | 23.50 | 18.25 | 1.72  | Up   | 1.80E-01 |
| Cer(d38:0)       | 595.6 | 25.19 | 18.40 | 1.37 | 2.92 | 23.10 | 14.86 | 27.85 | 21.72 | -1.37 | Down | 1.00E-04 |
| Cer(d38:0+O)     | 611.6 | 24.36 | 27.26 | 2.93 | 3.10 | 20.20 | 23.21 | 28.90 | 31.33 | 1.12  | Up   | 3.16E-02 |
| Cer(d38:0+pO)    | 611.6 | 26.61 | 26.64 | 0.39 | 2.78 | 25.88 | 18.25 | 27.28 | 29.08 | 1     | Up   | 7.92E-02 |
| Cer(d38:0+pO+O)  | 627.6 | 19.95 | 24.17 | 2.82 | 2.54 | 16.03 | 21.25 | 24.57 | 28.88 | 1.21  | Up   | 1.10E-03 |
| Cer(d38:1)       | 593.6 | 15.26 | 22.48 | 8.70 | 3.08 | 2.63  | 15.11 | 28.52 | 26.82 | 1.47  | Up   | 2.25E-02 |
| Cer(d38:1+pO+2O) | 641.6 | 21.11 | 23.03 | 2.21 | 1.56 | 16.00 | 18.25 | 23.23 | 24.16 | 1.09  | Up   | 1.30E-03 |
| Cer(d38:2+pO+2O) | 639.5 | 21.60 | 15.36 | 0.79 | 0.94 | 20.49 | 14.75 | 23.12 | 18.25 | -1.41 | Down | 1.00E-04 |
| Cer(d38:3+hO+2O) | 637.5 | 21.05 | 15.36 | 1.62 | 0.94 | 18.79 | 14.75 | 23.72 | 18.25 | -1.37 | Down | 1.00E-04 |
| Cer(d38:7+hO)    | 597.5 | 19.80 | 20.87 | 5.81 | 3.70 | 2.63  | 14.95 | 24.27 | 24.71 | 1.05  | Up   | 3.47E-01 |
| Cer(d39:0)       | 609.6 | 21.07 | 15.36 | 1.99 | 0.94 | 18.88 | 14.75 | 25.14 | 18.25 | -1.37 | Down | 1.00E-04 |
| Cer(d39:0+pO+O)  | 641.6 | 24.53 | 28.12 | 1.19 | 2.64 | 22.57 | 23.73 | 26.28 | 32.91 | 1.15  | Up   | 6.00E-04 |
| Cer(d39:1)       | 607.6 | 14.79 | 15.36 | 4.40 | 0.94 | 4.21  | 14.75 | 21.60 | 18.25 | 1.04  | Up   | 7.12E-01 |
| Cer(d39:1+hO+O)  | 639.6 | 24.87 | 25.67 | 1.04 | 2.44 | 23.15 | 22.44 | 26.28 | 30.71 | 1.03  | Up   | 3.16E-01 |
| Cer(d39:6)       | 597.5 | 17.35 | 22.65 | 6.68 | 2.38 | 4.21  | 18.25 | 24.84 | 27.02 | 1.31  | Up   | 2.81E-02 |
| Cer(d39:6+hO)    | 613.5 | 19.44 | 22.49 | 9.32 | 4.94 | 4.21  | 15.00 | 31.51 | 30.68 | 1.16  | Up   | 3.48E-01 |

|                  |       |       |       |      |      |       |       |       |       |       |      |          |
|------------------|-------|-------|-------|------|------|-------|-------|-------|-------|-------|------|----------|
| Cer(d39:7+hO)    | 611.5 | 24.42 | 24.73 | 4.89 | 6.79 | 16.08 | 15.00 | 29.40 | 32.97 | 1.01  | Up   | 8.80E-01 |
| Cer(d40:0)       | 623.6 | 25.63 | 19.67 | 1.72 | 4.77 | 23.39 | 14.97 | 29.55 | 30.19 | -1.3  | Down | 4.00E-04 |
| Cer(d40:0+O)     | 639.6 | 16.54 | 23.74 | 4.80 | 2.22 | 4.21  | 21.52 | 22.53 | 29.84 | 1.44  | Up   | 1.00E-04 |
| Cer(d40:0+pO+2O) | 671.6 | 21.61 | 22.15 | 1.77 | 3.77 | 19.72 | 14.95 | 24.12 | 26.07 | 1.02  | Up   | 3.47E-01 |
| Cer(d40:0+pO+O)  | 655.6 | 18.36 | 23.46 | 3.63 | 3.45 | 14.91 | 15.59 | 25.05 | 28.67 | 1.28  | Up   | 5.60E-03 |
| Cer(d40:1+hO)    | 637.6 | 24.83 | 15.36 | 0.86 | 0.94 | 23.87 | 14.75 | 26.46 | 18.25 | -1.62 | Down | 1.00E-04 |
| Cer(d40:1+pO)    | 637.6 | 22.07 | 25.05 | 4.07 | 2.19 | 15.69 | 18.25 | 25.55 | 26.47 | 1.14  | Up   | 2.80E-03 |
| Cer(d40:1+pO+2O) | 669.6 | 18.66 | 15.36 | 1.92 | 0.94 | 16.26 | 14.75 | 22.01 | 18.25 | -1.21 | Down | 1.00E-04 |
| Cer(d40:2+pO+2O) | 667.6 | 19.68 | 21.80 | 3.00 | 1.25 | 15.57 | 18.25 | 25.98 | 23.16 | 1.11  | Up   | 2.25E-02 |
| Cer(d40:6+hO)    | 627.5 | 21.56 | 23.16 | 1.81 | 1.89 | 18.34 | 18.25 | 24.55 | 25.63 | 1.07  | Up   | 2.25E-02 |
| Cer(d40:6+pO)    | 627.5 | 14.34 | 21.38 | 7.50 | 2.44 | 2.63  | 15.58 | 25.11 | 24.89 | 1.49  | Up   | 1.17E-02 |
| Cer(d40:8)       | 607.5 | 17.46 | 15.36 | 5.22 | 0.94 | 2.63  | 14.75 | 22.37 | 18.25 | -1.14 | Down | 1.90E-03 |
| Cer(d41:0)       | 637.6 | 23.96 | 24.63 | 0.77 | 1.45 | 22.66 | 21.86 | 24.96 | 26.49 | 1.03  | Up   | 1.87E-01 |
| Cer(d41:0+pO)    | 653.6 | 25.16 | 15.36 | 1.29 | 0.94 | 23.73 | 14.75 | 28.35 | 18.25 | -1.64 | Down | 1.00E-04 |
| Cer(d41:1+hO+O)  | 667.6 | 22.35 | 25.75 | 1.08 | 2.28 | 20.37 | 23.03 | 24.59 | 31.55 | 1.15  | Up   | 3.00E-04 |
| Cer(d41:1+O)     | 651.6 | 22.25 | 15.36 | 4.55 | 0.94 | 15.42 | 14.75 | 25.98 | 18.25 | -1.45 | Down | 1.00E-04 |
| Cer(d41:4+pO)    | 645.6 | 19.01 | 15.36 | 4.05 | 0.94 | 13.09 | 14.75 | 24.32 | 18.25 | -1.24 | Down | 7.92E-02 |
| Cer(d42:0)       | 651.7 | 23.53 | 22.92 | 3.28 | 4.15 | 16.68 | 15.15 | 26.00 | 28.09 | -1.03 | Down | 6.44E-01 |
| Cer(d42:1)       | 649.6 | 18.28 | 25.34 | 8.62 | 2.47 | 2.63  | 18.25 | 26.54 | 27.05 | 1.39  | Up   | 1.38E-02 |
| Cer(d42:1+O)     | 665.6 | 20.32 | 25.02 | 1.50 | 1.59 | 16.70 | 22.17 | 21.52 | 27.23 | 1.23  | Up   | 1.00E-04 |
| Cer(d42:1+pO)    | 665.6 | 19.89 | 15.36 | 1.71 | 0.94 | 16.55 | 14.75 | 21.27 | 18.25 | -1.3  | Down | 1.00E-04 |
| Cer(d42:1+pO+2O) | 697.6 | 21.32 | 15.36 | 1.33 | 0.94 | 19.10 | 14.75 | 23.19 | 18.25 | -1.39 | Down | 1.00E-04 |
| Cer(d42:2)       | 647.6 | 21.09 | 23.82 | 2.15 | 1.80 | 15.24 | 21.45 | 23.12 | 27.02 | 1.13  | Up   | 2.80E-03 |
| Cer(d42:2+pO+2O) | 695.6 | 20.83 | 15.36 | 3.74 | 0.94 | 15.73 | 14.75 | 25.60 | 18.25 | -1.36 | Down | 1.00E-04 |
| Cer(d42:3)       | 645.6 | 19.75 | 22.03 | 6.66 | 1.20 | 5.89  | 20.95 | 25.46 | 25.37 | 1.12  | Up   | 9.76E-01 |
| Cer(d42:5+pO)    | 657.6 | 19.23 | 24.64 | 2.69 | 1.91 | 17.15 | 21.59 | 25.43 | 28.59 | 1.28  | Up   | 8.00E-04 |
| Cer(d42:6+hO)    | 655.6 | 21.39 | 15.36 | 2.58 | 0.94 | 19.16 | 14.75 | 25.44 | 18.25 | -1.39 | Down | 1.00E-04 |
| Cer(d42:6+pO)    | 655.6 | 21.38 | 24.95 | 4.49 | 2.20 | 12.99 | 18.25 | 24.91 | 26.97 | 1.17  | Up   | 5.00E-04 |
| Cer(d42:7+hO)    | 653.5 | 23.54 | 24.69 | 0.77 | 2.32 | 22.25 | 18.25 | 24.84 | 27.60 | 1.05  | Up   | 5.60E-03 |
| Cer(d43:0)       | 665.7 | 22.09 | 24.30 | 0.81 | 1.23 | 21.12 | 21.88 | 23.53 | 26.55 | 1.1   | Up   | 1.00E-04 |
| Cer(d43:0+pO)    | 681.7 | 25.34 | 15.36 | 0.87 | 0.94 | 24.18 | 14.75 | 27.20 | 18.25 | -1.65 | Down | 1.00E-04 |
| Cer(d43:1+pO+2O) | 711.6 | 22.42 | 15.36 | 1.20 | 0.94 | 19.83 | 14.75 | 24.32 | 18.25 | -1.46 | Down | 1.00E-04 |
| Cer(d43:2+hO)    | 677.6 | 22.07 | 15.36 | 2.04 | 0.94 | 17.76 | 14.75 | 23.99 | 18.25 | -1.44 | Down | 1.00E-04 |
| Cer(d43:2+pO+2O) | 709.6 | 24.07 | 23.76 | 0.96 | 1.90 | 22.56 | 18.25 | 25.99 | 25.42 | -1.01 | Down | 8.33E-01 |
| Cer(d43:3+pO)    | 675.6 | 22.21 | 15.36 | 1.29 | 0.94 | 19.06 | 14.75 | 24.13 | 18.25 | -1.45 | Down | 1.00E-04 |
| Cer(d43:4+pO)    | 673.6 | 20.25 | 15.36 | 4.61 | 0.94 | 13.57 | 14.75 | 24.13 | 18.25 | -1.32 | Down | 7.92E-02 |
| Cer(d43:5+pO)    | 671.6 | 24.52 | 25.00 | 1.14 | 0.96 | 22.63 | 23.77 | 26.51 | 26.13 | 1.02  | Up   | 5.25E-01 |
| Cer(d44:0)       | 679.7 | 20.03 | 23.91 | 6.10 | 1.86 | 2.63  | 18.25 | 24.34 | 25.31 | 1.19  | Up   | 1.20E-03 |

|                 |       |       |       |       |      |       |       |       |       |       |      |          |
|-----------------|-------|-------|-------|-------|------|-------|-------|-------|-------|-------|------|----------|
| Cer(d44:1)      | 677.7 | 24.10 | 25.45 | 0.83  | 0.72 | 22.62 | 24.19 | 25.42 | 26.71 | 1.06  | Up   | 4.00E-04 |
| Cer(d44:4+pO)   | 687.6 | 25.57 | 25.58 | 0.83  | 2.39 | 24.29 | 18.25 | 27.15 | 27.33 | 1     | Up   | 1.51E-01 |
| Cer(d44:5+pO)   | 685.6 | 18.60 | 24.30 | 2.94  | 1.96 | 15.31 | 22.37 | 24.37 | 29.46 | 1.31  | Up   | 4.00E-04 |
| Cer(d44:6+pO)   | 683.6 | 22.95 | 24.84 | 1.49  | 0.54 | 18.95 | 24.06 | 24.78 | 25.69 | 1.08  | Up   | 4.00E-04 |
| Cer(d44:7+hO)   | 681.6 | 23.64 | 24.68 | 0.71  | 2.39 | 22.90 | 18.25 | 25.14 | 27.49 | 1.04  | Up   | 8.60E-03 |
| Cer(d45:4+pO)   | 701.6 | 22.70 | 22.32 | 1.37  | 2.56 | 20.26 | 15.58 | 25.14 | 26.77 | -1.02 | Down | 7.35E-01 |
| Cer(d45:5)      | 683.6 | 19.99 | 23.81 | 3.46  | 1.88 | 14.03 | 18.25 | 23.50 | 25.49 | 1.19  | Up   | 2.00E-04 |
| Cer(d45:5+pO)   | 699.6 | 24.29 | 24.34 | 1.29  | 1.77 | 22.19 | 22.13 | 26.46 | 29.27 | 1     | Up   | 6.08E-01 |
| Cer(d45:7)      | 679.6 | 13.92 | 17.31 | 10.07 | 3.47 | 2.63  | 14.86 | 25.95 | 24.75 | 1.24  | Up   | 7.34E-01 |
| Cer(d46:1)      | 705.7 | 17.23 | 15.36 | 5.38  | 0.94 | 2.63  | 14.75 | 20.98 | 18.25 | -1.12 | Down | 2.67E-02 |
| Cer(d47:5)      | 711.7 | 20.07 | 23.83 | 3.60  | 1.84 | 13.80 | 18.25 | 23.48 | 25.31 | 1.19  | Up   | 1.00E-04 |
| Cer(d47:6)      | 709.6 | 26.45 | 26.71 | 0.68  | 2.73 | 25.25 | 18.25 | 27.54 | 28.48 | 1.01  | Up   | 1.50E-02 |
| Cer(d47:7)      | 707.6 | 22.16 | 24.22 | 2.45  | 2.04 | 16.33 | 18.25 | 25.07 | 25.88 | 1.09  | Up   | 1.30E-03 |
| Cer(d47:7+hO)   | 723.6 | 15.07 | 15.36 | 5.85  | 0.94 | 2.63  | 14.75 | 21.74 | 18.25 | 1.02  | Up   | 1.90E-01 |
| Cer(d48:6)      | 723.7 | 23.23 | 23.73 | 1.23  | 2.03 | 21.04 | 18.25 | 25.34 | 26.47 | 1.02  | Up   | 1.90E-01 |
| Cer(d48:7)      | 721.6 | 8.52  | 15.36 | 7.58  | 0.94 | 2.63  | 14.75 | 20.92 | 18.25 | 1.8   | Up   | 5.92E-02 |
| Cer(d48:7+hO)   | 737.6 | 21.55 | 21.18 | 1.50  | 3.14 | 19.71 | 14.86 | 24.33 | 23.83 | -1.02 | Down | 4.87E-01 |
| Cer(d52:0)      | 791.8 | 13.96 | 15.36 | 9.27  | 0.94 | 2.63  | 14.75 | 24.77 | 18.25 | 1.1   | Up   | 7.82E-01 |
| Cer(d52:1+hO+O) | 821.8 | 12.65 | 15.36 | 10.78 | 0.94 | 2.63  | 14.75 | 25.72 | 18.25 | 1.21  | Up   | 7.34E-01 |
| Cer(d52:7)      | 777.7 | 20.39 | 15.36 | 0.99  | 0.94 | 18.89 | 14.75 | 21.86 | 18.25 | -1.33 | Down | 1.00E-04 |
| Cer(d52:8)      | 775.7 | 23.68 | 28.47 | 3.61  | 1.55 | 17.05 | 26.41 | 28.32 | 31.62 | 1.2   | Up   | 1.20E-03 |
| Cer(d53:1)      | 803.8 | 9.34  | 15.36 | 7.66  | 0.94 | 2.63  | 14.75 | 20.29 | 18.25 | 1.64  | Up   | 2.28E-01 |
| Cer(d53:1+hO+O) | 835.8 | 12.20 | 15.36 | 10.50 | 0.94 | 2.63  | 14.75 | 24.98 | 18.25 | 1.26  | Up   | 7.34E-01 |
| Cer(d53:6)      | 793.7 | 4.49  | 15.36 | 4.69  | 0.94 | 2.63  | 14.75 | 18.27 | 18.25 | 3.42  | Up   | 8.00E-04 |
| Cer(d53:8)      | 789.7 | 13.14 | 15.36 | 9.65  | 0.94 | 2.63  | 14.75 | 23.58 | 18.25 | 1.17  | Up   | 7.81E-01 |
| Cer(d54:0)      | 819.8 | 10.23 | 15.36 | 9.71  | 0.94 | 2.63  | 14.75 | 24.89 | 18.25 | 1.5   | Up   | 2.79E-01 |
| Cer(d54:2+pO)   | 831.8 | 16.59 | 15.36 | 8.40  | 0.94 | 2.63  | 14.75 | 23.27 | 18.25 | -1.08 | Down | 2.81E-01 |
| Cer(d54:3+pO)   | 829.8 | 17.04 | 23.53 | 8.10  | 2.41 | 2.63  | 18.25 | 23.99 | 27.46 | 1.38  | Up   | 2.66E-02 |
| Cer(d54:8)      | 803.7 | 24.51 | 22.35 | 4.63  | 4.90 | 17.21 | 14.75 | 28.90 | 27.71 | -1.1  | Down | 1.18E-01 |
| Cer(d55:1+hO+O) | 863.8 | 26.77 | 15.36 | 1.24  | 0.94 | 24.04 | 14.75 | 28.38 | 18.25 | -1.74 | Down | 1.00E-04 |
| Cer(d56:0)      | 847.9 | 9.21  | 15.36 | 8.61  | 0.94 | 2.63  | 14.75 | 24.17 | 18.25 | 1.67  | Up   | 1.84E-01 |
| Cer(d56:0+pO+O) | 879.9 | 8.02  | 15.36 | 6.63  | 0.94 | 2.63  | 14.75 | 17.28 | 18.25 | 1.92  | Up   | 4.44E-02 |
| Cer(d56:1+pOEO) | 891.8 | 29.81 | 27.32 | 1.48  | 3.02 | 26.54 | 21.84 | 31.74 | 30.63 | -1.09 | Down | 2.17E-02 |
| Cer(d56:2+pOEO) | 889.8 | 29.67 | 22.82 | 0.78  | 4.02 | 28.35 | 15.07 | 31.03 | 28.76 | -1.3  | Down | 1.00E-04 |
| Cer(d56:8)      | 831.7 | 25.25 | 29.77 | 6.07  | 1.71 | 15.94 | 26.88 | 30.54 | 31.83 | 1.18  | Up   | 4.54E-02 |
| Cer(d57:0+pOEO) | 907.9 | 25.06 | 15.36 | 5.42  | 0.94 | 14.33 | 14.75 | 29.24 | 18.25 | -1.63 | Down | 1.20E-03 |
| Cer(d57:1+pOEO) | 905.8 | 23.76 | 29.97 | 8.69  | 2.93 | 5.89  | 22.49 | 32.91 | 32.77 | 1.26  | Up   | 1.90E-01 |
| Cer(d57:1EO)    | 889.8 | 26.43 | 15.36 | 1.39  | 0.94 | 23.13 | 14.75 | 28.07 | 18.25 | -1.72 | Down | 1.00E-04 |

|                 |       |       |       |       |      |       |       |       |       |       |      |          |
|-----------------|-------|-------|-------|-------|------|-------|-------|-------|-------|-------|------|----------|
| Cer(d57:2+pOEO) | 903.8 | 34.37 | 28.31 | 0.79  | 3.37 | 33.29 | 21.46 | 35.78 | 33.29 | -1.21 | Down | 1.00E-04 |
| Cer(d57:2EO)    | 887.8 | 26.57 | 15.36 | 1.84  | 0.94 | 23.08 | 14.75 | 29.42 | 18.25 | -1.73 | Down | 1.00E-04 |
| Cer(d58:0)      | 875.9 | 11.75 | 15.36 | 8.86  | 0.94 | 2.63  | 14.75 | 23.33 | 18.25 | 1.31  | Up   | 6.88E-01 |
| Cer(d58:1+pOEO) | 919.9 | 21.09 | 15.36 | 6.75  | 0.94 | 4.21  | 14.75 | 28.16 | 18.25 | -1.37 | Down | 4.00E-04 |
| Cer(d58:2+pOEO) | 917.8 | 20.24 | 15.36 | 8.96  | 0.94 | 2.63  | 14.75 | 28.25 | 18.25 | -1.32 | Down | 1.29E-02 |
| Cer(d58:3+hOEO) | 915.8 | 22.99 | 22.91 | 4.71  | 3.75 | 16.99 | 15.07 | 29.82 | 27.94 | -1    | Down | 9.64E-01 |
| Cer(d58:7)      | 861.8 | 23.71 | 15.36 | 7.74  | 0.94 | 2.63  | 14.75 | 29.47 | 18.25 | -1.54 | Down | 1.00E-03 |
| Cer(d58:7+hO)   | 877.8 | 25.21 | 15.36 | 4.13  | 0.94 | 18.36 | 14.75 | 28.87 | 18.25 | -1.64 | Down | 1.00E-04 |
| Cer(d58:8)      | 859.8 | 27.18 | 32.48 | 5.24  | 0.98 | 19.64 | 30.82 | 31.93 | 33.46 | 1.19  | Up   | 9.00E-04 |
| Cer(d59:1+pOEO) | 933.9 | 26.96 | 15.36 | 3.31  | 0.94 | 18.61 | 14.75 | 29.32 | 18.25 | -1.75 | Down | 1.00E-04 |
| Cer(d59:1EO)    | 917.9 | 15.20 | 15.36 | 8.39  | 0.94 | 2.63  | 14.75 | 23.73 | 18.25 | 1.01  | Up   | 5.18E-01 |
| Cer(d59:2EO)    | 915.9 | 22.09 | 15.36 | 2.83  | 0.94 | 17.21 | 14.75 | 26.37 | 18.25 | -1.44 | Down | 1.00E-04 |
| Cer(d59:3+hOEO) | 929.8 | 31.30 | 33.00 | 1.26  | 1.83 | 29.55 | 28.11 | 32.77 | 34.86 | 1.05  | Up   | 8.80E-03 |
| Cer(d59:3EO)    | 913.8 | 22.89 | 15.36 | 3.19  | 0.94 | 19.06 | 14.75 | 26.82 | 18.25 | -1.49 | Down | 1.00E-04 |
| Cer(d60:0+pOEO) | 949.9 | 19.60 | 15.36 | 2.59  | 0.94 | 16.49 | 14.75 | 23.42 | 18.25 | -1.28 | Down | 1.00E-04 |
| Cer(d60:3+hOEO) | 943.9 | 15.23 | 15.36 | 10.40 | 0.94 | 2.63  | 14.75 | 26.49 | 18.25 | 1.01  | Up   | 4.06E-01 |
| Cer(d60:8)      | 887.8 | 27.38 | 31.82 | 5.59  | 0.92 | 17.07 | 30.45 | 31.68 | 33.63 | 1.16  | Up   | 5.60E-03 |
| Cer(d61:2EO)    | 943.9 | 12.89 | 15.36 | 11.02 | 0.94 | 2.63  | 14.75 | 26.19 | 18.25 | 1.19  | Up   | 7.34E-01 |
| Cer(d61:3)      | 911.9 | 4.97  | 15.36 | 4.14  | 0.94 | 2.63  | 14.75 | 13.70 | 18.25 | 3.09  | Up   | 1.00E-04 |
| Cer(d61:3+hOEO) | 957.9 | 21.88 | 15.36 | 3.93  | 0.94 | 17.12 | 14.75 | 27.04 | 18.25 | -1.42 | Down | 1.00E-04 |
| Cer(d61:3EO)    | 941.9 | 21.38 | 15.36 | 3.27  | 0.94 | 17.29 | 14.75 | 25.89 | 18.25 | -1.39 | Down | 1.00E-04 |
| Cer(d62:1)      | 930   | 5.23  | 15.36 | 4.73  | 0.94 | 2.63  | 14.75 | 15.78 | 18.25 | 2.94  | Up   | 7.00E-04 |
| Cer(d62:3+hOEO) | 971.9 | 15.46 | 15.36 | 9.02  | 0.94 | 2.63  | 14.75 | 24.69 | 18.25 | -1.01 | Down | 1.85E-01 |
| Cer(d62:7)      | 917.9 | 22.52 | 15.36 | 9.63  | 0.94 | 2.63  | 14.75 | 28.88 | 18.25 | -1.47 | Down | 1.06E-02 |
| Cer(d62:8)      | 915.8 | 31.16 | 32.27 | 0.55  | 1.02 | 30.35 | 30.22 | 31.93 | 34.30 | 1.04  | Up   | 4.30E-03 |
| Cer(d63:2EO)    | 971.9 | 14.56 | 15.36 | 9.70  | 0.94 | 2.63  | 14.75 | 25.42 | 18.25 | 1.05  | Up   | 6.89E-01 |
| Cer(d63:3+pO)   | 955.9 | 4.29  | 15.36 | 4.03  | 0.94 | 2.63  | 14.75 | 16.03 | 18.25 | 3.58  | Up   | 6.00E-04 |
| Cer(d63:3EO)    | 969.9 | 13.27 | 15.36 | 10.38 | 0.94 | 2.63  | 14.75 | 25.94 | 18.25 | 1.16  | Up   | 8.29E-01 |
| Cer(d63:4EO)    | 967.9 | 18.35 | 15.36 | 6.50  | 0.94 | 2.63  | 14.75 | 25.39 | 18.25 | -1.19 | Down | 1.56E-02 |
| Cer(d64:1EO)    | 988   | 11.97 | 15.36 | 6.88  | 0.94 | 2.63  | 14.75 | 20.66 | 18.25 | 1.28  | Up   | 5.18E-01 |
| Cer(d64:3+hOEO) | 999.9 | 8.75  | 15.36 | 6.20  | 0.94 | 2.63  | 14.75 | 16.26 | 18.25 | 1.76  | Up   | 2.07E-02 |
| Cer(d65:0)      | 974   | 9.29  | 15.36 | 7.13  | 0.94 | 2.63  | 14.75 | 17.64 | 18.25 | 1.65  | Up   | 2.05E-01 |
| Cer(d66:1EO)    | 1016  | 8.54  | 15.36 | 6.50  | 0.94 | 2.63  | 14.75 | 19.91 | 18.25 | 1.8   | Up   | 3.87E-02 |
| Cer(d68:1EO)    | 1044  | 8.55  | 15.36 | 7.65  | 0.94 | 2.63  | 14.75 | 22.11 | 18.25 | 1.8   | Up   | 4.44E-02 |
| Cer(d72:3EO)    | 1096  | 9.76  | 15.36 | 9.03  | 0.94 | 2.63  | 14.75 | 23.01 | 18.25 | 1.57  | Up   | 2.79E-01 |
| Cer(d73:0+pOEO) | 1132  | 12.33 | 15.36 | 9.88  | 0.94 | 2.63  | 14.75 | 27.93 | 18.25 | 1.25  | Up   | 7.34E-01 |
| Cer(d77:0+pOEO) | 1188  | 14.40 | 15.36 | 7.38  | 0.94 | 2.63  | 14.75 | 25.16 | 18.25 | 1.07  | Up   | 4.87E-01 |
| Cer(d78:0EO)    | 1186  | 9.57  | 15.36 | 7.31  | 0.94 | 2.63  | 14.75 | 19.27 | 18.25 | 1.61  | Up   | 6.87E-02 |

|                        |       |       |       |       |      |       |       |       |       |       |      |          |
|------------------------|-------|-------|-------|-------|------|-------|-------|-------|-------|-------|------|----------|
| CerG1(d14:0/44:1EO)    | 1066  | 22.02 | 15.36 | 2.95  | 0.94 | 17.21 | 14.75 | 27.63 | 18.25 | -1.43 | Down | 1.00E-04 |
| CerG1(d14:0/45:1EO)    | 1080  | 18.38 | 15.36 | 5.78  | 0.94 | 4.21  | 14.75 | 24.91 | 18.25 | -1.2  | Down | 6.80E-03 |
| CerG1(d16:0+pO/18:1)   | 715.6 | 19.13 | 22.20 | 3.61  | 2.75 | 13.26 | 14.95 | 22.78 | 24.08 | 1.16  | Up   | 2.30E-03 |
| CerG1(d16:0+pO/22:0+O) | 789.6 | 27.24 | 15.36 | 0.58  | 0.94 | 25.86 | 14.75 | 28.07 | 18.25 | -1.77 | Down | 1.00E-04 |
| CerG1(d16:0+pO/22:1)   | 771.6 | 20.26 | 15.36 | 9.75  | 0.94 | 2.63  | 14.75 | 27.17 | 18.25 | -1.32 | Down | 2.10E-02 |
| CerG1(d16:0+pO/23:1)   | 785.6 | 20.63 | 25.60 | 8.25  | 2.75 | 2.63  | 18.25 | 26.55 | 27.38 | 1.24  | Up   | 4.39E-02 |
| CerG1(d16:1/18:1)      | 697.5 | 17.91 | 22.04 | 5.93  | 2.70 | 2.63  | 14.95 | 22.35 | 24.32 | 1.23  | Up   | 2.30E-03 |
| CerG1(d16:1/23:1)      | 767.6 | 20.69 | 24.91 | 8.30  | 2.48 | 2.63  | 18.25 | 26.60 | 27.16 | 1.2   | Up   | 6.44E-01 |
| CerG1(d16:1/44:0EO)    | 1094  | 24.41 | 25.36 | 1.02  | 2.45 | 23.53 | 18.25 | 26.23 | 27.26 | 1.04  | Up   | 1.29E-02 |
| CerG1(d16:1/44:1EO)    | 1092  | 25.19 | 25.56 | 1.09  | 2.62 | 23.75 | 18.25 | 27.34 | 27.88 | 1.01  | Up   | 1.90E-01 |
| CerG1(d16:1/44:2EO)    | 1090  | 24.27 | 15.36 | 1.04  | 0.94 | 22.92 | 14.75 | 26.41 | 18.25 | -1.58 | Down | 1.00E-04 |
| CerG1(d17:0/44:1EO)    | 1108  | 15.63 | 15.36 | 6.79  | 0.94 | 2.63  | 14.75 | 22.77 | 18.25 | -1.02 | Down | 4.49E-01 |
| CerG1(d17:0/44:2EO)    | 1106  | 12.93 | 15.36 | 9.71  | 0.94 | 2.63  | 14.75 | 25.05 | 18.25 | 1.19  | Up   | 8.29E-01 |
| CerG1(d17:0+pO)        | 479.3 | 26.86 | 27.90 | 0.97  | 1.34 | 25.85 | 25.58 | 28.81 | 29.67 | 1.04  | Up   | 6.88E-02 |
| CerG1(d17:1/18:0)      | 713.6 | 16.14 | 22.75 | 8.72  | 1.51 | 2.63  | 18.25 | 22.76 | 24.46 | 1.41  | Up   | 6.00E-04 |
| CerG1(d17:1/44:2EO)    | 1104  | 14.95 | 15.36 | 8.38  | 0.94 | 2.63  | 14.75 | 23.81 | 18.25 | 1.03  | Up   | 1.31E-01 |
| CerG1(d18:0/18:0)      | 729.6 | 25.50 | 26.34 | 1.27  | 1.29 | 22.38 | 23.56 | 27.42 | 28.27 | 1.03  | Up   | 1.30E-01 |
| CerG1(d18:0/22:0)      | 785.7 | 22.25 | 15.36 | 1.98  | 0.94 | 20.48 | 14.75 | 26.55 | 18.25 | -1.45 | Down | 1.00E-04 |
| CerG1(d18:0/23:0)      | 799.7 | 25.35 | 25.52 | 0.56  | 2.79 | 24.25 | 18.25 | 26.16 | 27.38 | 1.01  | Up   | 7.93E-02 |
| CerG1(d18:0/24:0)      | 813.7 | 28.04 | 26.58 | 0.39  | 3.21 | 27.51 | 18.25 | 28.75 | 28.87 | -1.05 | Down | 6.01E-01 |
| CerG1(d18:0/24:0+O)    | 829.7 | 28.09 | 28.60 | 0.41  | 1.54 | 27.58 | 25.42 | 28.90 | 30.15 | 1.02  | Up   | 2.88E-01 |
| CerG1(d18:0/25:0)      | 827.7 | 25.42 | 25.22 | 0.93  | 2.66 | 23.54 | 18.25 | 26.82 | 27.76 | -1.01 | Down | 3.72E-01 |
| CerG1(d18:0/25:0+O)    | 843.7 | 28.24 | 29.17 | 1.30  | 2.22 | 25.84 | 25.45 | 30.06 | 32.97 | 1.03  | Up   | 2.41E-01 |
| CerG1(d18:0/26:0+O)    | 857.7 | 17.52 | 15.36 | 7.13  | 0.94 | 2.63  | 14.75 | 25.07 | 18.25 | -1.14 | Down | 1.29E-02 |
| CerG1(d18:0+pO/16:0)   | 717.6 | 16.55 | 25.26 | 11.04 | 0.75 | 2.63  | 23.83 | 25.12 | 25.99 | 1.53  | Up   | 1.80E-03 |
| CerG1(d18:0+pO/18:0)   | 745.6 | 23.76 | 28.80 | 7.85  | 1.52 | 12.31 | 26.43 | 30.08 | 30.60 | 1.21  | Up   | 2.68E-01 |
| CerG1(d18:0+pO/18:1)   | 743.6 | 26.92 | 26.44 | 1.74  | 2.93 | 24.69 | 18.25 | 29.72 | 29.27 | -1.02 | Down | 6.51E-01 |
| CerG1(d18:0+pO/20:0)   | 773.6 | 21.05 | 26.58 | 9.00  | 1.43 | 2.63  | 23.09 | 27.60 | 28.04 | 1.26  | Up   | 2.07E-01 |
| CerG1(d18:0+pO/20:3)   | 767.6 | 27.29 | 27.92 | 0.53  | 0.85 | 26.48 | 26.66 | 28.46 | 29.02 | 1.02  | Up   | 4.85E-02 |
| CerG1(d18:0+pO/22:0)   | 801.7 | 27.40 | 15.36 | 0.71  | 0.94 | 26.13 | 14.75 | 28.71 | 18.25 | -1.78 | Down | 1.00E-04 |
| CerG1(d18:0+pO/22:1)   | 799.7 | 23.51 | 22.98 | 4.66  | 3.14 | 18.12 | 15.58 | 29.46 | 27.00 | -1.02 | Down | 8.05E-01 |
| CerG1(d18:0+pO/23:0)   | 815.7 | 28.13 | 15.36 | 0.33  | 0.94 | 27.43 | 14.75 | 28.67 | 18.25 | -1.83 | Down | 1.00E-04 |
| CerG1(d18:0+pO/23:1)   | 813.7 | 22.75 | 23.25 | 1.46  | 1.93 | 19.45 | 18.25 | 25.39 | 25.30 | 1.02  | Up   | 1.86E-01 |
| CerG1(d18:0+pO/23:2)   | 811.7 | 16.38 | 25.37 | 8.98  | 3.42 | 2.63  | 14.95 | 27.43 | 27.31 | 1.55  | Up   | 2.25E-02 |
| CerG1(d18:0+pO/24:0+O) | 845.7 | 28.86 | 30.54 | 3.82  | 1.68 | 21.50 | 27.90 | 32.14 | 32.62 | 1.06  | Up   | 3.56E-01 |
| CerG1(d18:0+pO/24:1)   | 827.7 | 31.55 | 25.87 | 0.43  | 1.69 | 30.82 | 23.10 | 32.55 | 28.23 | -1.22 | Down | 1.00E-04 |
| CerG1(d18:0+pO/24:2)   | 825.7 | 31.50 | 26.26 | 0.53  | 1.56 | 30.88 | 23.03 | 32.83 | 28.25 | -1.2  | Down | 1.00E-04 |
| CerG1(d18:0+pO/25:1)   | 841.7 | 30.34 | 30.84 | 0.94  | 2.18 | 27.81 | 27.23 | 31.55 | 33.13 | 1.02  | Up   | 7.35E-01 |



|                        |       |       |       |      |      |       |       |       |       |       |      |          |
|------------------------|-------|-------|-------|------|------|-------|-------|-------|-------|-------|------|----------|
| CerG1(d18:0+pO/25:2)   | 839.7 | 29.84 | 30.87 | 0.51 | 1.82 | 29.38 | 28.41 | 31.03 | 33.29 | 1.03  | Up   | 8.32E-02 |
| CerG1(d18:0+pO/26:0)   | 857.7 | 22.13 | 25.54 | 7.33 | 1.64 | 2.63  | 21.68 | 27.11 | 27.84 | 1.15  | Up   | 5.80E-01 |
| CerG1(d18:0+pO/26:0+O) | 873.7 | 26.29 | 28.71 | 1.13 | 1.87 | 25.37 | 25.06 | 28.97 | 31.66 | 1.09  | Up   | 5.10E-03 |
| CerG1(d18:0+pO/26:1)   | 855.7 | 29.99 | 29.64 | 1.20 | 2.02 | 26.73 | 25.66 | 31.62 | 32.20 | -1.01 | Down | 1.00E+00 |
| CerG1(d18:0+pO/26:2)   | 853.7 | 30.42 | 24.51 | 0.60 | 1.53 | 29.16 | 22.09 | 31.66 | 28.30 | -1.24 | Down | 1.00E-04 |
| CerG1(d18:0+pO/26:3)   | 851.7 | 27.35 | 28.24 | 1.11 | 1.00 | 24.63 | 26.29 | 28.92 | 29.79 | 1.03  | Up   | 9.65E-02 |
| CerG1(d18:0+pO/26:4)   | 849.7 | 24.05 | 27.68 | 4.57 | 1.41 | 16.70 | 25.45 | 28.59 | 29.58 | 1.15  | Up   | 3.74E-02 |
| CerG1(d18:0+pO/27:2)   | 867.7 | 26.43 | 27.81 | 1.19 | 1.60 | 23.26 | 24.48 | 27.49 | 31.10 | 1.05  | Up   | 1.16E-02 |
| CerG1(d18:0+pO/27:3)   | 865.7 | 25.91 | 25.55 | 0.81 | 2.68 | 23.95 | 18.25 | 27.08 | 27.90 | -1.01 | Down | 5.66E-01 |
| CerG1(d18:0+pO/27:4)   | 863.7 | 23.82 | 15.36 | 4.07 | 0.94 | 16.14 | 14.75 | 27.42 | 18.25 | -1.55 | Down | 1.00E-04 |
| CerG1(d18:0+pO/28:2)   | 881.7 | 24.58 | 24.81 | 1.29 | 2.50 | 21.08 | 18.25 | 26.15 | 26.77 | 1.01  | Up   | 9.08E-02 |
| CerG1(d18:0+pO/28:4)   | 877.7 | 27.25 | 27.34 | 0.58 | 1.36 | 26.34 | 24.44 | 28.27 | 28.87 | 1     | Up   | 8.31E-01 |
| CerG1(d18:0+pO/34:2)   | 965.8 | 12.04 | 20.94 | 8.94 | 2.94 | 2.63  | 14.95 | 23.21 | 23.24 | 1.74  | Up   | 8.70E-03 |
| CerG1(d18:0+pO/40:2)   | 1050  | 17.74 | 15.36 | 5.49 | 0.94 | 4.21  | 14.75 | 23.91 | 18.25 | -1.15 | Down | 1.56E-02 |
| CerG1(d18:0+pO/40:3)   | 1048  | 19.69 | 24.79 | 3.09 | 1.15 | 15.48 | 23.24 | 24.44 | 27.25 | 1.26  | Up   | 2.00E-04 |
| CerG1(d18:1/16:0)      | 699.6 | 25.93 | 22.12 | 1.83 | 2.66 | 22.49 | 15.58 | 28.13 | 24.82 | -1.17 | Down | 1.10E-03 |
| CerG1(d18:1/18:0)      | 727.6 | 28.95 | 29.75 | 1.07 | 1.55 | 26.29 | 27.61 | 30.25 | 31.58 | 1.03  | Up   | 4.23E-01 |
| CerG1(d18:1/19:0)      | 741.6 | 17.88 | 22.45 | 8.56 | 3.08 | 2.63  | 14.95 | 24.40 | 25.53 | 1.26  | Up   | 1.86E-01 |
| CerG1(d18:1/20:0)      | 755.6 | 26.56 | 27.68 | 0.84 | 1.29 | 25.02 | 24.58 | 27.52 | 29.30 | 1.04  | Up   | 2.37E-02 |
| CerG1(d18:1/20:0+O)    | 771.6 | 22.52 | 15.36 | 6.35 | 0.94 | 5.89  | 14.75 | 28.95 | 18.25 | -1.47 | Down | 4.00E-04 |
| CerG1(d18:1/20:1)      | 753.6 | 19.74 | 15.36 | 9.40 | 0.94 | 2.63  | 14.75 | 27.17 | 18.25 | -1.29 | Down | 2.10E-02 |
| CerG1(d18:1/20:3)      | 749.6 | 24.88 | 27.08 | 4.05 | 0.86 | 17.72 | 25.80 | 28.76 | 28.22 | 1.09  | Up   | 6.22E-01 |
| CerG1(d18:1/22:0)      | 783.7 | 27.36 | 28.20 | 0.72 | 0.96 | 26.12 | 26.56 | 28.67 | 29.32 | 1.03  | Up   | 2.85E-02 |
| CerG1(d18:1/22:0+O)    | 799.7 | 28.11 | 30.08 | 3.38 | 1.30 | 21.68 | 27.99 | 31.37 | 31.66 | 1.07  | Up   | 3.47E-01 |
| CerG1(d18:1/22:1)      | 781.6 | 29.07 | 29.61 | 0.44 | 1.69 | 28.18 | 26.54 | 29.82 | 31.55 | 1.02  | Up   | 3.10E-01 |
| CerG1(d18:1/22:2)      | 779.6 | 21.27 | 15.36 | 7.63 | 0.94 | 2.63  | 14.75 | 27.26 | 18.25 | -1.38 | Down | 1.50E-02 |
| CerG1(d18:1/23:0)      | 797.7 | 30.95 | 28.58 | 0.45 | 1.50 | 30.42 | 24.80 | 31.91 | 30.15 | -1.08 | Down | 2.00E-04 |
| CerG1(d18:1/23:0+O)    | 813.7 | 32.36 | 29.30 | 0.62 | 1.49 | 31.10 | 26.70 | 33.37 | 31.37 | -1.1  | Down | 1.00E-04 |
| CerG1(d18:1/23:1)      | 795.7 | 28.80 | 29.38 | 0.57 | 1.38 | 27.99 | 26.74 | 29.71 | 30.95 | 1.02  | Up   | 1.99E-01 |
| CerG1(d18:1/23:5)      | 787.6 | 22.94 | 15.36 | 1.40 | 0.94 | 20.17 | 14.75 | 25.69 | 18.25 | -1.49 | Down | 1.00E-04 |
| CerG1(d18:1/24:0)      | 811.7 | 30.22 | 30.06 | 0.33 | 1.49 | 29.47 | 26.91 | 30.60 | 31.68 | -1.01 | Down | 7.13E-01 |
| CerG1(d18:1/24:1)      | 809.7 | 31.55 | 25.93 | 0.53 | 1.49 | 30.51 | 23.77 | 32.70 | 29.10 | -1.22 | Down | 1.00E-04 |
| CerG1(d18:1/24:2)      | 807.7 | 29.68 | 30.07 | 0.92 | 1.29 | 28.32 | 28.62 | 30.92 | 33.23 | 1.01  | Up   | 4.08E-01 |
| CerG1(d18:1/25:0)      | 825.7 | 28.73 | 27.57 | 0.86 | 3.39 | 27.28 | 18.25 | 30.54 | 30.74 | -1.04 | Down | 5.80E-01 |
| CerG1(d18:1/25:1)      | 823.7 | 30.41 | 30.31 | 0.71 | 2.15 | 28.72 | 26.76 | 31.58 | 32.70 | -1    | Down | 8.72E-01 |
| CerG1(d18:1/25:2)      | 821.7 | 21.90 | 26.54 | 5.40 | 1.72 | 16.86 | 22.20 | 29.36 | 27.79 | 1.21  | Up   | 1.34E-01 |
| CerG1(d18:1/26:0)      | 839.7 | 26.62 | 26.04 | 0.82 | 2.94 | 24.98 | 18.25 | 27.95 | 28.71 | -1.02 | Down | 4.98E-01 |
| CerG1(d18:1/26:1)      | 837.7 | 30.18 | 29.68 | 0.96 | 2.18 | 27.60 | 25.66 | 31.26 | 32.35 | -1.02 | Down | 9.76E-01 |

|                        |       |       |       |      |      |       |       |       |       |       |      |          |
|------------------------|-------|-------|-------|------|------|-------|-------|-------|-------|-------|------|----------|
| CerG1(d18:1/26:2)      | 835.7 | 27.84 | 27.47 | 1.26 | 2.02 | 26.58 | 22.22 | 30.01 | 29.64 | -1.01 | Down | 8.33E-01 |
| CerG1(d18:1/27:1)      | 851.7 | 24.70 | 23.84 | 1.83 | 3.66 | 19.69 | 14.95 | 27.10 | 27.18 | -1.04 | Down | 1.00E+00 |
| CerG1(d18:1/28:4)      | 859.7 | 26.13 | 26.47 | 1.98 | 1.29 | 20.68 | 23.50 | 28.01 | 27.87 | 1.01  | Up   | 8.80E-01 |
| CerG1(d18:1/44:2EO)    | 1118  | 23.12 | 15.36 | 1.11 | 0.94 | 21.09 | 14.75 | 25.28 | 18.25 | -1.51 | Down | 1.00E-04 |
| CerG1(d18:1+hO)        | 491.3 | 19.20 | 15.36 | 2.05 | 0.94 | 14.78 | 14.75 | 23.17 | 18.25 | -1.25 | Down | 1.00E-03 |
| CerG1(d18:1+hO/20:3)   | 765.6 | 25.31 | 24.13 | 1.10 | 2.23 | 24.17 | 18.25 | 27.30 | 26.37 | -1.05 | Down | 3.40E-01 |
| CerG1(d18:1+hO/22:0+O) | 815.6 | 26.70 | 15.36 | 1.14 | 0.94 | 23.57 | 14.75 | 27.66 | 18.25 | -1.74 | Down | 1.00E-04 |
| CerG1(d18:1+hO/24:2)   | 823.7 | 27.57 | 15.36 | 0.82 | 0.94 | 26.19 | 14.75 | 29.24 | 18.25 | -1.79 | Down | 1.00E-04 |
| CerG1(d18:1+hO/25:0+O) | 857.7 | 25.89 | 15.36 | 5.34 | 0.94 | 16.22 | 14.75 | 30.58 | 18.25 | -1.69 | Down | 1.00E-04 |
| CerG1(d18:1+hO/25:2)   | 837.7 | 24.21 | 25.03 | 2.59 | 2.69 | 18.03 | 18.25 | 26.77 | 27.84 | 1.03  | Up   | 2.88E-01 |
| CerG1(d18:2/18:0)      | 725.6 | 27.05 | 15.36 | 1.61 | 0.94 | 25.52 | 14.75 | 29.72 | 18.25 | -1.76 | Down | 1.00E-04 |
| CerG1(d18:2/18:0+O)    | 741.6 | 24.87 | 24.35 | 1.58 | 2.30 | 22.91 | 18.25 | 27.38 | 26.49 | -1.02 | Down | 8.33E-01 |
| CerG1(d18:2/18:1)      | 723.6 | 23.64 | 24.38 | 1.16 | 0.99 | 20.78 | 22.62 | 24.97 | 25.81 | 1.03  | Up   | 1.11E-01 |
| CerG1(d18:2/20:0)      | 753.6 | 19.41 | 26.48 | 7.16 | 1.48 | 5.89  | 22.60 | 28.67 | 27.97 | 1.36  | Up   | 6.04E-02 |
| CerG1(d18:2/20:0+O)    | 769.6 | 24.54 | 15.36 | 3.11 | 0.94 | 21.40 | 14.75 | 29.34 | 18.25 | -1.6  | Down | 1.00E-04 |
| CerG1(d18:2/22:0+O)    | 797.6 | 27.21 | 15.36 | 0.98 | 0.94 | 26.07 | 14.75 | 28.62 | 18.25 | -1.77 | Down | 1.00E-04 |
| CerG1(d18:2/23:0+O)    | 811.7 | 25.97 | 15.36 | 3.93 | 0.94 | 19.95 | 14.75 | 29.80 | 18.25 | -1.69 | Down | 1.00E-04 |
| CerG1(d18:2/25:1)      | 821.7 | 23.18 | 15.36 | 5.12 | 0.94 | 15.46 | 14.75 | 27.35 | 18.25 | -1.51 | Down | 1.00E-04 |
| CerG1(d19:0+pO)        | 507.3 | 22.93 | 24.70 | 3.03 | 2.34 | 18.28 | 18.25 | 27.41 | 27.16 | 1.08  | Up   | 1.51E-01 |
| CerG1(d19:1+hO)        | 505.3 | 25.36 | 21.32 | 0.85 | 1.18 | 24.48 | 18.25 | 27.00 | 23.06 | -1.19 | Down | 1.00E-04 |
| CerG1(d20:1)           | 503.3 | 15.23 | 21.73 | 6.74 | 2.51 | 2.63  | 15.58 | 21.76 | 24.59 | 1.43  | Up   | 1.70E-03 |
| CerG1(d21:0)           | 519.4 | 18.19 | 15.36 | 2.91 | 0.94 | 13.37 | 14.75 | 23.94 | 18.25 | -1.18 | Down | 3.50E-03 |
| CerG1(d21:0+pO)        | 535.4 | 19.10 | 23.80 | 2.34 | 2.25 | 15.46 | 21.35 | 23.52 | 29.60 | 1.25  | Up   | 1.00E-04 |
| CerG1(d22:0+pO)        | 549.4 | 17.02 | 24.26 | 7.53 | 1.67 | 2.63  | 22.46 | 23.40 | 27.56 | 1.43  | Up   | 2.00E-04 |
| CerG1(d22:1)           | 531.4 | 21.90 | 24.96 | 1.27 | 1.75 | 20.23 | 23.00 | 24.29 | 28.35 | 1.14  | Up   | 1.00E-04 |
| CerG1(d23:0+pO)        | 563.4 | 18.87 | 24.54 | 3.16 | 1.90 | 14.25 | 22.77 | 24.27 | 29.58 | 1.3   | Up   | 1.00E-04 |
| CerG1(d23:1)           | 545.4 | 19.17 | 24.54 | 2.77 | 1.94 | 15.16 | 22.76 | 24.28 | 29.67 | 1.28  | Up   | 1.00E-04 |
| CerG1(d23:1+hO)        | 561.4 | 14.50 | 22.98 | 8.01 | 1.46 | 2.63  | 21.33 | 23.81 | 25.34 | 1.58  | Up   | 5.60E-03 |
| CerG1(d24:0+pO/34:3)   | 1048  | 19.66 | 15.36 | 7.04 | 0.94 | 2.63  | 14.75 | 24.80 | 18.25 | -1.28 | Down | 7.92E-02 |
| CerG1(d24:0+pO/36:3)   | 1076  | 19.76 | 15.36 | 3.74 | 0.94 | 15.61 | 14.75 | 25.82 | 18.25 | -1.29 | Down | 1.00E-04 |
| CerG1(d24:0+pO/36:4)   | 1074  | 17.61 | 15.36 | 5.68 | 0.94 | 5.89  | 14.75 | 25.16 | 18.25 | -1.15 | Down | 3.16E-01 |
| CerG1(d24:1+hO)        | 575.4 | 21.54 | 24.84 | 1.07 | 1.60 | 19.88 | 22.75 | 23.53 | 27.65 | 1.15  | Up   | 1.00E-04 |
| CerG1(d25:0)           | 575.4 | 20.21 | 23.05 | 5.28 | 2.14 | 5.89  | 18.25 | 25.36 | 26.26 | 1.14  | Up   | 1.18E-01 |
| CerG1(d25:1+hO)        | 589.4 | 18.75 | 24.70 | 3.51 | 1.95 | 13.09 | 22.75 | 24.32 | 29.73 | 1.32  | Up   | 1.00E-04 |
| CerG1(d26:0+pO)        | 605.5 | 15.21 | 15.36 | 6.58 | 0.94 | 2.63  | 14.75 | 20.58 | 18.25 | 1.01  | Up   | 9.05E-02 |
| CerG1(d26:1)           | 587.4 | 16.55 | 15.36 | 5.33 | 0.94 | 2.63  | 14.75 | 20.74 | 18.25 | -1.08 | Down | 7.92E-02 |
| CerG1(d27:0)           | 603.5 | 21.16 | 22.16 | 2.45 | 2.93 | 17.24 | 15.58 | 24.92 | 25.90 | 1.05  | Up   | 3.85E-01 |
| CerG1(d27:0+O)         | 619.5 | 14.62 | 15.36 | 7.75 | 0.94 | 2.63  | 14.75 | 21.42 | 18.25 | 1.05  | Up   | 7.91E-02 |

|                    |       |       |       |       |      |       |       |       |       |       |      |          |
|--------------------|-------|-------|-------|-------|------|-------|-------|-------|-------|-------|------|----------|
| CerG1(d27:1)       | 601.5 | 18.89 | 22.98 | 2.48  | 1.60 | 14.28 | 18.25 | 21.70 | 24.54 | 1.22  | Up   | 1.00E-04 |
| CerG1(d28:0+2O)    | 649.5 | 16.73 | 15.36 | 7.52  | 0.94 | 2.63  | 14.75 | 22.81 | 18.25 | -1.09 | Down | 7.93E-02 |
| CerG1(d28:1+pO+2O) | 663.5 | 21.62 | 25.69 | 0.87  | 1.85 | 20.94 | 23.16 | 23.72 | 30.04 | 1.19  | Up   | 1.00E-04 |
| CerG1(d28:2)       | 613.5 | 13.89 | 22.60 | 7.61  | 2.92 | 2.63  | 14.86 | 23.68 | 25.45 | 1.63  | Up   | 1.20E-03 |
| CerG1(d29:0+2O)    | 663.5 | 16.88 | 15.36 | 5.01  | 0.94 | 2.63  | 14.75 | 21.60 | 18.25 | -1.1  | Down | 1.70E-03 |
| CerG1(d29:1+2O)    | 661.5 | 13.03 | 20.53 | 6.83  | 3.38 | 2.63  | 15.00 | 20.58 | 25.15 | 1.57  | Up   | 4.60E-03 |
| CerG1(d29:1+pO+2O) | 677.5 | 19.90 | 24.52 | 1.91  | 1.98 | 16.55 | 22.77 | 24.00 | 29.76 | 1.23  | Up   | 1.00E-04 |
| CerG1(d30:0+O)     | 661.5 | 15.22 | 22.84 | 6.43  | 2.43 | 4.21  | 18.25 | 25.11 | 26.84 | 1.5   | Up   | 2.80E-03 |
| CerG1(d30:0+pO+2O) | 693.5 | 11.18 | 19.48 | 9.47  | 3.39 | 2.63  | 15.00 | 23.85 | 23.01 | 1.74  | Up   | 8.90E-02 |
| CerG1(d30:0+pO+O)  | 677.5 | 8.55  | 15.36 | 9.35  | 0.94 | 2.63  | 14.75 | 26.27 | 18.25 | 1.8   | Up   | 6.25E-02 |
| CerG1(d30:1)       | 643.5 | 19.46 | 23.34 | 6.14  | 2.78 | 4.21  | 18.25 | 25.73 | 27.89 | 1.2   | Up   | 1.10E-01 |
| CerG1(d30:1+hO+O)  | 675.5 | 14.66 | 19.52 | 7.02  | 4.08 | 2.63  | 15.07 | 20.72 | 25.03 | 1.33  | Up   | 1.10E-01 |
| CerG1(d30:2)       | 641.5 | 17.59 | 24.48 | 6.03  | 2.19 | 2.63  | 21.57 | 25.86 | 27.74 | 1.39  | Up   | 3.60E-03 |
| CerG1(d30:3)       | 639.5 | 13.04 | 19.01 | 8.51  | 3.80 | 2.63  | 14.75 | 23.91 | 24.35 | 1.46  | Up   | 1.85E-01 |
| CerG1(d31:0+O)     | 675.5 | 15.47 | 22.46 | 6.99  | 3.88 | 2.63  | 15.07 | 23.08 | 26.87 | 1.45  | Up   | 7.40E-03 |
| CerG1(d31:0+pO+2O) | 707.5 | 26.84 | 28.02 | 0.63  | 3.15 | 26.15 | 18.25 | 27.89 | 30.58 | 1.04  | Up   | 8.00E-04 |
| CerG1(d31:1)       | 657.5 | 18.08 | 22.45 | 6.22  | 3.88 | 2.63  | 15.07 | 24.86 | 26.85 | 1.24  | Up   | 3.74E-02 |
| CerG1(d31:1+hO+O)  | 689.5 | 29.81 | 31.57 | 0.81  | 1.63 | 28.81 | 27.52 | 30.88 | 33.04 | 1.06  | Up   | 5.60E-03 |
| CerG1(d31:1+pO+2O) | 705.5 | 15.83 | 25.01 | 8.60  | 2.18 | 2.63  | 23.05 | 22.49 | 31.10 | 1.58  | Up   | 1.00E-04 |
| CerG1(d31:2+2O)    | 687.5 | 20.48 | 24.97 | 1.48  | 2.09 | 17.76 | 23.05 | 23.04 | 30.63 | 1.22  | Up   | 1.00E-04 |
| CerG1(d31:2+hO)    | 671.5 | 16.15 | 15.36 | 1.47  | 0.94 | 13.46 | 14.75 | 18.10 | 18.25 | -1.05 | Down | 1.51E-01 |
| CerG1(d32:0+pO+2O) | 721.5 | 19.26 | 15.36 | 6.56  | 0.94 | 2.63  | 14.75 | 24.96 | 18.25 | -1.25 | Down | 4.50E-03 |
| CerG1(d32:1)       | 671.5 | 6.98  | 15.36 | 5.29  | 0.94 | 2.63  | 14.75 | 14.97 | 18.25 | 2.2   | Up   | 1.00E-04 |
| CerG1(d32:1+O)     | 687.5 | 20.18 | 15.36 | 1.16  | 0.94 | 17.97 | 14.75 | 21.76 | 18.25 | -1.31 | Down | 1.00E-04 |
| CerG1(d32:2)       | 669.5 | 19.53 | 25.58 | 4.56  | 2.39 | 12.91 | 22.46 | 25.90 | 28.85 | 1.31  | Up   | 1.40E-03 |
| CerG1(d32:2+2O)    | 701.5 | 18.52 | 15.36 | 1.65  | 0.94 | 16.50 | 14.75 | 21.35 | 18.25 | -1.21 | Down | 2.00E-04 |
| CerG1(d32:2+hO+2O) | 717.5 | 25.48 | 21.37 | 2.18  | 5.09 | 22.51 | 15.11 | 29.80 | 26.97 | -1.19 | Down | 1.04E-01 |
| CerG1(d32:2+pO)    | 685.5 | 25.29 | 30.37 | 6.64  | 1.24 | 15.79 | 27.89 | 31.30 | 32.08 | 1.2   | Up   | 1.63E-02 |
| CerG1(d32:3)       | 667.5 | 18.86 | 23.91 | 3.75  | 2.78 | 14.10 | 18.25 | 25.82 | 27.81 | 1.27  | Up   | 1.40E-03 |
| CerG1(d32:4+pO)    | 681.5 | 15.35 | 15.36 | 10.06 | 0.94 | 2.63  | 14.75 | 28.77 | 18.25 | 1     | Up   | 3.72E-01 |
| CerG1(d33:0)       | 687.6 | 16.72 | 22.79 | 2.77  | 1.99 | 12.72 | 21.14 | 23.15 | 27.14 | 1.36  | Up   | 4.00E-04 |
| CerG1(d33:0+pO)    | 703.6 | 23.67 | 27.16 | 0.93  | 2.30 | 22.41 | 23.59 | 25.23 | 32.97 | 1.15  | Up   | 2.00E-04 |
| CerG1(d33:0+pO+2O) | 735.5 | 28.10 | 28.51 | 0.89  | 3.43 | 26.23 | 18.25 | 29.30 | 31.91 | 1.01  | Up   | 2.68E-02 |
| CerG1(d33:0+pO+O)  | 719.6 | 24.26 | 21.25 | 3.81  | 1.20 | 17.33 | 18.25 | 27.31 | 23.29 | -1.14 | Down | 6.04E-02 |
| CerG1(d33:1+hO+O)  | 717.5 | 31.95 | 15.36 | 0.61  | 0.94 | 31.06 | 14.75 | 33.04 | 18.25 | -2.08 | Down | 1.00E-04 |
| CerG1(d33:1+pO+2O) | 733.5 | 25.68 | 26.86 | 0.99  | 0.93 | 23.77 | 24.65 | 27.26 | 28.27 | 1.05  | Up   | 7.40E-03 |
| CerG1(d33:2+2O)    | 715.5 | 31.21 | 32.83 | 0.75  | 1.71 | 30.27 | 28.71 | 32.40 | 34.17 | 1.05  | Up   | 1.06E-02 |
| CerG1(d33:4)       | 679.5 | 15.39 | 15.36 | 10.12 | 0.94 | 2.63  | 14.75 | 23.47 | 18.25 | -1    | Down | 2.80E-01 |

|                    |       |       |       |       |      |       |       |       |       |       |      |          |
|--------------------|-------|-------|-------|-------|------|-------|-------|-------|-------|-------|------|----------|
| CerG1(d34:0)       | 701.6 | 21.42 | 23.67 | 1.79  | 1.90 | 18.05 | 18.25 | 22.88 | 25.82 | 1.11  | Up   | 2.00E-04 |
| CerG1(d34:2)       | 697.5 | 18.61 | 24.53 | 3.91  | 2.69 | 12.65 | 21.93 | 24.66 | 29.20 | 1.32  | Up   | 1.00E-04 |
| CerG1(d34:2+2O)    | 729.5 | 29.17 | 30.01 | 0.71  | 1.48 | 28.41 | 26.24 | 30.45 | 31.42 | 1.03  | Up   | 2.88E-02 |
| CerG1(d34:3+2O)    | 727.5 | 23.81 | 15.36 | 6.39  | 0.94 | 13.92 | 14.75 | 29.47 | 18.25 | -1.55 | Down | 2.80E-03 |
| CerG1(d35:0)       | 715.6 | 18.85 | 22.11 | 2.73  | 2.85 | 15.36 | 15.58 | 25.09 | 26.55 | 1.17  | Up   | 1.08E-02 |
| CerG1(d35:1)       | 713.6 | 17.05 | 21.20 | 5.06  | 4.86 | 2.63  | 14.86 | 20.52 | 27.86 | 1.24  | Up   | 1.18E-01 |
| CerG1(d35:1+O)     | 729.6 | 23.94 | 21.41 | 5.42  | 4.25 | 19.31 | 15.15 | 30.82 | 26.19 | -1.12 | Down | 5.66E-01 |
| CerG1(d35:2)       | 711.6 | 28.56 | 21.61 | 2.68  | 2.46 | 23.21 | 15.07 | 31.78 | 25.33 | -1.32 | Down | 1.00E-04 |
| CerG1(d35:2+2O)    | 743.6 | 34.40 | 34.88 | 0.81  | 1.46 | 33.70 | 31.51 | 36.45 | 36.45 | 1.01  | Up   | 6.42E-02 |
| CerG1(d35:2+hO)    | 727.6 | 20.64 | 15.36 | 7.03  | 0.94 | 2.63  | 14.75 | 29.58 | 18.25 | -1.34 | Down | 4.00E-04 |
| CerG1(d35:3+2O)    | 741.5 | 31.57 | 33.15 | 0.65  | 1.76 | 30.68 | 28.20 | 32.55 | 34.38 | 1.05  | Up   | 2.50E-03 |
| CerG1(d35:4)       | 707.5 | 27.74 | 28.49 | 1.14  | 3.29 | 25.52 | 18.25 | 29.38 | 30.30 | 1.03  | Up   | 9.70E-03 |
| CerG1(d36:0+pO)    | 745.6 | 22.50 | 24.11 | 1.07  | 2.18 | 21.51 | 18.25 | 25.03 | 26.71 | 1.07  | Up   | 8.90E-03 |
| CerG1(d36:0+pO+2O) | 777.6 | 24.90 | 22.26 | 7.93  | 2.23 | 17.97 | 18.25 | 35.78 | 27.58 | -1.12 | Down | 4.42E-01 |
| CerG1(d36:1)       | 727.6 | 20.84 | 23.96 | 2.74  | 2.13 | 15.61 | 18.25 | 25.46 | 26.71 | 1.15  | Up   | 8.60E-03 |
| CerG1(d36:1+hO+O)  | 759.6 | 24.59 | 23.76 | 1.61  | 2.05 | 22.37 | 18.25 | 27.33 | 25.47 | -1.03 | Down | 6.01E-01 |
| CerG1(d36:2)       | 725.6 | 22.78 | 22.19 | 1.83  | 3.80 | 18.85 | 15.07 | 24.67 | 27.77 | -1.03 | Down | 6.32E-01 |
| CerG1(d36:2+2O)    | 757.6 | 28.12 | 15.36 | 1.61  | 0.94 | 24.51 | 14.75 | 29.94 | 18.25 | -1.83 | Down | 1.00E-04 |
| CerG1(d36:3)       | 723.6 | 17.83 | 15.36 | 8.74  | 0.94 | 2.63  | 14.75 | 26.62 | 18.25 | -1.16 | Down | 1.40E-01 |
| CerG1(d36:3+2O)    | 755.6 | 20.33 | 23.18 | 2.77  | 3.68 | 15.88 | 15.58 | 24.87 | 28.05 | 1.14  | Up   | 5.00E-02 |
| CerG1(d36:3+O)     | 739.6 | 23.92 | 24.57 | 1.48  | 0.50 | 22.73 | 23.85 | 26.66 | 25.49 | 1.03  | Up   | 7.93E-02 |
| CerG1(d36:4)       | 721.5 | 23.85 | 24.48 | 1.54  | 0.59 | 22.01 | 23.40 | 26.65 | 25.47 | 1.03  | Up   | 9.08E-02 |
| CerG1(d36:4+pO)    | 737.5 | 18.02 | 21.74 | 5.31  | 2.53 | 2.63  | 14.95 | 21.70 | 23.64 | 1.21  | Up   | 3.40E-03 |
| CerG1(d37:0)       | 743.6 | 20.05 | 25.10 | 2.61  | 2.29 | 15.67 | 22.33 | 25.23 | 29.40 | 1.25  | Up   | 1.00E-04 |
| CerG1(d37:0+O)     | 759.6 | 21.20 | 23.31 | 2.32  | 3.59 | 15.22 | 15.07 | 23.85 | 27.85 | 1.1   | Up   | 9.08E-02 |
| CerG1(d37:1)       | 741.6 | 19.60 | 23.05 | 2.32  | 3.54 | 13.60 | 15.07 | 22.22 | 28.08 | 1.18  | Up   | 1.70E-03 |
| CerG1(d37:1+O)     | 757.6 | 23.98 | 15.36 | 3.22  | 0.94 | 20.95 | 14.75 | 29.14 | 18.25 | -1.56 | Down | 1.00E-04 |
| CerG1(d37:2+hO+O)  | 771.6 | 33.28 | 34.11 | 0.64  | 1.60 | 32.30 | 30.77 | 34.76 | 35.58 | 1.03  | Up   | 4.87E-02 |
| CerG1(d37:2+pO)    | 755.6 | 20.10 | 15.36 | 11.57 | 0.94 | 2.63  | 14.75 | 28.63 | 18.25 | -1.31 | Down | 6.92E-02 |
| CerG1(d37:3)       | 737.6 | 22.59 | 24.90 | 4.12  | 2.26 | 16.36 | 22.85 | 28.97 | 29.72 | 1.1   | Up   | 1.18E-01 |
| CerG1(d37:3+pO)    | 753.6 | 23.34 | 15.36 | 9.52  | 0.94 | 2.63  | 14.75 | 30.75 | 18.25 | -1.52 | Down | 5.95E-02 |
| CerG1(d37:4)       | 735.6 | 23.33 | 15.36 | 9.52  | 0.94 | 2.63  | 14.75 | 30.75 | 18.25 | -1.52 | Down | 5.95E-02 |
| CerG1(d38:0+O)     | 773.6 | 23.23 | 24.03 | 1.39  | 2.73 | 20.03 | 21.06 | 24.96 | 28.77 | 1.03  | Up   | 3.82E-01 |
| CerG1(d38:1)       | 755.6 | 18.85 | 23.46 | 2.38  | 2.40 | 12.76 | 20.92 | 21.84 | 27.58 | 1.24  | Up   | 1.00E-04 |
| CerG1(d38:2)       | 753.6 | 21.01 | 26.34 | 5.91  | 1.67 | 11.99 | 23.77 | 26.05 | 28.85 | 1.25  | Up   | 4.50E-03 |
| CerG1(d38:2+hO+O)  | 785.6 | 27.07 | 27.94 | 1.01  | 0.86 | 24.35 | 26.73 | 28.47 | 29.20 | 1.03  | Up   | 6.48E-02 |
| CerG1(d38:2+pO+2O) | 801.6 | 26.01 | 25.05 | 2.19  | 2.54 | 20.41 | 18.25 | 29.08 | 27.10 | -1.04 | Down | 3.25E-01 |
| CerG1(d38:3)       | 751.6 | 18.04 | 25.14 | 9.11  | 1.58 | 2.63  | 22.82 | 25.35 | 27.74 | 1.39  | Up   | 1.78E-02 |

|                    |       |       |       |      |      |       |       |       |       |       |      |          |
|--------------------|-------|-------|-------|------|------|-------|-------|-------|-------|-------|------|----------|
| CerG1(d38:3+2O)    | 783.6 | 26.74 | 25.84 | 1.33 | 2.81 | 25.58 | 18.25 | 29.46 | 28.11 | -1.03 | Down | 6.89E-01 |
| CerG1(d38:4)       | 749.6 | 17.67 | 15.36 | 8.87 | 0.94 | 2.63  | 14.75 | 27.41 | 18.25 | -1.15 | Down | 1.03E-01 |
| CerG1(d38:4+2O)    | 781.6 | 21.87 | 15.36 | 1.70 | 0.94 | 18.10 | 14.75 | 23.40 | 18.25 | -1.42 | Down | 1.00E-04 |
| CerG1(d38:4+pO)    | 765.6 | 20.60 | 15.36 | 3.12 | 0.94 | 17.04 | 14.75 | 25.51 | 18.25 | -1.34 | Down | 1.00E-04 |
| CerG1(d38:5)       | 747.6 | 24.68 | 23.96 | 1.63 | 2.17 | 22.73 | 18.25 | 27.91 | 26.24 | -1.03 | Down | 8.80E-01 |
| CerG1(d38:5+pO)    | 763.6 | 25.54 | 22.48 | 4.41 | 2.79 | 19.19 | 15.58 | 29.34 | 24.48 | -1.14 | Down | 1.17E-01 |
| CerG1(d39:0)       | 771.7 | 17.84 | 15.36 | 2.43 | 0.94 | 15.34 | 14.75 | 23.58 | 18.25 | -1.16 | Down | 4.00E-04 |
| CerG1(d39:0+O)     | 787.7 | 24.07 | 25.79 | 1.72 | 3.79 | 19.87 | 21.28 | 25.49 | 31.58 | 1.07  | Up   | 6.95E-01 |
| CerG1(d39:0+pO)    | 787.7 | 20.82 | 23.43 | 1.67 | 2.69 | 17.88 | 20.90 | 23.29 | 28.97 | 1.13  | Up   | 1.88E-02 |
| CerG1(d39:1)       | 769.6 | 24.83 | 25.41 | 2.45 | 3.51 | 19.47 | 21.36 | 28.67 | 30.51 | 1.02  | Up   | 6.55E-01 |
| CerG1(d39:1+hO+O)  | 801.6 | 18.62 | 21.47 | 5.41 | 2.35 | 2.63  | 15.58 | 21.76 | 23.94 | 1.15  | Up   | 7.00E-03 |
| CerG1(d39:3+pO)    | 781.6 | 23.85 | 24.80 | 5.68 | 1.69 | 14.68 | 21.78 | 28.88 | 27.13 | 1.04  | Up   | 2.88E-01 |
| CerG1(d39:4+hO)    | 779.6 | 23.32 | 15.36 | 7.10 | 0.94 | 15.45 | 14.75 | 32.35 | 18.25 | -1.52 | Down | 2.00E-04 |
| CerG1(d39:4+pO)    | 779.6 | 28.32 | 32.53 | 5.62 | 1.61 | 18.15 | 28.92 | 33.80 | 34.45 | 1.15  | Up   | 2.89E-02 |
| CerG1(d39:5)       | 761.6 | 27.69 | 32.41 | 6.24 | 1.60 | 18.21 | 28.87 | 33.70 | 34.30 | 1.17  | Up   | 2.27E-02 |
| CerG1(d39:5+pO)    | 777.6 | 27.40 | 15.36 | 3.96 | 0.94 | 22.19 | 14.75 | 34.17 | 18.25 | -1.78 | Down | 1.00E-04 |
| CerG1(d40:0+O)     | 801.7 | 24.13 | 24.14 | 1.60 | 3.97 | 19.88 | 15.07 | 25.91 | 29.96 | 1     | Up   | 8.33E-01 |
| CerG1(d40:0+pO)    | 801.7 | 21.21 | 24.30 | 2.38 | 3.41 | 14.97 | 20.91 | 24.48 | 30.04 | 1.15  | Up   | 2.25E-02 |
| CerG1(d40:1)       | 783.7 | 23.18 | 24.42 | 2.09 | 4.42 | 18.15 | 15.07 | 26.08 | 30.65 | 1.05  | Up   | 3.98E-01 |
| CerG1(d40:1+O)     | 799.7 | 22.74 | 23.86 | 1.37 | 2.57 | 19.79 | 21.06 | 24.84 | 27.91 | 1.05  | Up   | 2.15E-01 |
| CerG1(d40:2)       | 781.6 | 25.24 | 24.04 | 3.87 | 3.09 | 19.64 | 20.95 | 28.41 | 29.42 | -1.05 | Down | 7.35E-01 |
| CerG1(d40:3)       | 779.6 | 27.51 | 27.40 | 1.04 | 2.38 | 25.25 | 23.86 | 28.57 | 30.25 | -1    | Down | 7.82E-01 |
| CerG1(d40:3+2O)    | 811.6 | 24.83 | 25.21 | 2.46 | 2.56 | 18.68 | 18.25 | 26.70 | 27.05 | 1.02  | Up   | 4.06E-01 |
| CerG1(d40:4)       | 777.6 | 24.51 | 15.36 | 0.89 | 0.94 | 22.13 | 14.75 | 25.40 | 18.25 | -1.6  | Down | 1.00E-04 |
| CerG1(d40:4+pO)    | 793.6 | 24.81 | 25.23 | 2.44 | 2.58 | 18.68 | 18.25 | 26.66 | 27.08 | 1.02  | Up   | 3.89E-01 |
| CerG1(d41:0)       | 799.7 | 30.16 | 30.07 | 1.06 | 1.90 | 27.59 | 26.16 | 31.74 | 32.35 | -1    | Down | 9.02E-01 |
| CerG1(d41:0+O)     | 815.7 | 22.24 | 24.44 | 3.19 | 2.24 | 15.75 | 18.25 | 25.28 | 27.19 | 1.1   | Up   | 6.48E-02 |
| CerG1(d41:0+pO+2O) | 847.7 | 14.52 | 15.36 | 9.45 | 0.94 | 2.63  | 14.75 | 22.86 | 18.25 | 1.06  | Up   | 2.80E-01 |
| CerG1(d41:0+pO+O)  | 831.7 | 23.92 | 15.36 | 3.23 | 0.94 | 17.93 | 14.75 | 28.11 | 18.25 | -1.56 | Down | 1.00E-04 |
| CerG1(d41:1)       | 797.7 | 17.83 | 24.56 | 3.51 | 2.00 | 11.70 | 21.65 | 22.83 | 28.67 | 1.38  | Up   | 1.00E-04 |
| CerG1(d41:1+O)     | 813.7 | 18.04 | 22.77 | 1.99 | 3.51 | 13.03 | 14.97 | 19.84 | 28.18 | 1.26  | Up   | 2.00E-04 |
| CerG1(d41:3)       | 793.6 | 23.66 | 15.36 | 3.74 | 0.94 | 17.72 | 14.75 | 26.65 | 18.25 | -1.54 | Down | 1.00E-04 |
| CerG1(d41:4+pO)    | 807.6 | 31.24 | 31.98 | 0.52 | 1.80 | 30.25 | 27.86 | 32.35 | 33.80 | 1.02  | Up   | 1.94E-01 |
| CerG1(d41:5)       | 789.6 | 27.38 | 15.36 | 5.57 | 0.94 | 19.14 | 14.75 | 32.40 | 18.25 | -1.78 | Down | 1.00E-04 |
| CerG1(d41:5+hO)    | 805.6 | 30.76 | 31.82 | 0.61 | 1.65 | 30.22 | 27.94 | 31.93 | 33.46 | 1.03  | Up   | 3.36E-02 |
| CerG1(d41:6)       | 787.6 | 26.82 | 22.27 | 5.50 | 2.65 | 15.20 | 15.59 | 31.74 | 24.25 | -1.2  | Down | 6.94E-02 |
| CerG1(d42:0+pO+2O) | 861.7 | 23.26 | 15.36 | 5.82 | 0.94 | 14.19 | 14.75 | 27.65 | 18.25 | -1.51 | Down | 1.50E-02 |
| CerG1(d42:0+pO+O)  | 845.7 | 22.94 | 15.36 | 1.73 | 0.94 | 19.27 | 14.75 | 24.46 | 18.25 | -1.49 | Down | 1.00E-04 |

|                    |       |       |       |      |      |       |       |       |       |       |      |          |
|--------------------|-------|-------|-------|------|------|-------|-------|-------|-------|-------|------|----------|
| CerG1(d42:1+O)     | 827.7 | 19.34 | 22.33 | 2.02 | 4.04 | 14.68 | 14.97 | 22.04 | 27.52 | 1.15  | Up   | 3.65E-02 |
| CerG1(d42:2)       | 809.7 | 18.71 | 23.60 | 2.10 | 3.01 | 13.70 | 20.78 | 21.28 | 28.81 | 1.26  | Up   | 1.00E-04 |
| CerG1(d42:3)       | 807.7 | 25.12 | 28.08 | 4.68 | 3.44 | 18.30 | 18.25 | 29.40 | 31.10 | 1.12  | Up   | 1.66E-01 |
| CerG1(d42:4)       | 805.6 | 26.32 | 29.73 | 2.15 | 1.68 | 21.65 | 26.02 | 28.16 | 31.33 | 1.13  | Up   | 1.50E-03 |
| CerG1(d42:4+pO)    | 821.6 | 22.50 | 26.84 | 4.16 | 1.25 | 15.89 | 24.37 | 26.43 | 28.59 | 1.19  | Up   | 5.00E-04 |
| CerG1(d43:0)       | 827.7 | 28.90 | 23.11 | 4.00 | 4.12 | 23.15 | 14.86 | 32.62 | 28.16 | -1.25 | Down | 1.06E-02 |
| CerG1(d43:0+pO)    | 843.7 | 21.75 | 25.35 | 2.19 | 2.17 | 18.45 | 22.23 | 25.88 | 28.90 | 1.17  | Up   | 7.00E-04 |
| CerG1(d43:0+pO+2O) | 875.7 | 25.65 | 26.30 | 1.52 | 3.45 | 22.71 | 18.25 | 27.10 | 30.12 | 1.03  | Up   | 2.60E-01 |
| CerG1(d43:0+pO+O)  | 859.7 | 26.48 | 15.36 | 6.07 | 0.94 | 16.28 | 14.75 | 31.06 | 18.25 | -1.72 | Down | 1.00E-04 |
| CerG1(d43:1)       | 825.7 | 23.33 | 29.95 | 9.37 | 1.54 | 2.63  | 27.46 | 30.51 | 31.78 | 1.28  | Up   | 2.68E-02 |
| CerG1(d43:1+hO+O)  | 857.7 | 20.35 | 29.39 | 7.98 | 1.89 | 2.63  | 26.48 | 26.08 | 31.71 | 1.44  | Up   | 1.00E-04 |
| CerG1(d43:2+2O)    | 855.7 | 29.09 | 26.64 | 1.00 | 5.11 | 26.89 | 14.75 | 30.74 | 30.95 | -1.09 | Down | 4.06E-01 |
| CerG1(d43:4+pO)    | 835.7 | 23.88 | 27.42 | 3.40 | 1.11 | 16.12 | 24.60 | 27.05 | 28.52 | 1.15  | Up   | 5.00E-04 |
| CerG1(d43:5+pO)    | 833.6 | 14.33 | 23.99 | 8.22 | 2.09 | 2.63  | 18.25 | 25.61 | 26.30 | 1.67  | Up   | 1.90E-03 |
| CerG1(d44:0)       | 841.7 | 28.14 | 25.32 | 1.04 | 3.72 | 25.30 | 18.25 | 28.87 | 30.60 | -1.11 | Down | 6.88E-02 |
| CerG1(d44:1+hO+O)  | 871.7 | 26.60 | 15.36 | 5.81 | 0.94 | 17.02 | 14.75 | 31.68 | 18.25 | -1.73 | Down | 1.00E-04 |
| CerG1(d44:3)       | 835.7 | 23.70 | 24.19 | 5.96 | 2.25 | 14.42 | 18.25 | 29.02 | 26.71 | 1.02  | Up   | 2.88E-01 |
| CerG1(d44:4)       | 833.7 | 28.00 | 28.26 | 1.72 | 1.00 | 25.12 | 26.29 | 29.88 | 29.79 | 1.01  | Up   | 1.00E+00 |
| CerG1(d44:4+pO)    | 849.7 | 21.97 | 15.36 | 3.28 | 0.94 | 19.11 | 14.75 | 27.65 | 18.25 | -1.43 | Down | 1.00E-04 |
| CerG1(d44:5)       | 831.7 | 24.81 | 15.36 | 2.93 | 0.94 | 19.64 | 14.75 | 28.20 | 18.25 | -1.61 | Down | 1.00E-04 |
| CerG1(d44:5+pO)    | 847.7 | 26.86 | 29.13 | 1.48 | 1.38 | 23.88 | 26.97 | 29.10 | 31.40 | 1.08  | Up   | 1.10E-03 |
| CerG1(d44:6+pO)    | 845.6 | 22.12 | 24.34 | 4.18 | 2.38 | 14.27 | 18.25 | 26.02 | 26.79 | 1.1   | Up   | 2.68E-01 |
| CerG1(d45:0)       | 855.8 | 29.32 | 27.00 | 3.58 | 3.72 | 25.14 | 21.70 | 33.37 | 33.29 | -1.09 | Down | 8.48E-02 |
| CerG1(d45:0+pO)    | 871.7 | 22.11 | 15.36 | 2.55 | 0.94 | 17.88 | 14.75 | 26.69 | 18.25 | -1.44 | Down | 1.00E-04 |
| CerG1(d45:0+pO+O)  | 887.7 | 23.14 | 15.36 | 0.95 | 0.94 | 21.25 | 14.75 | 24.70 | 18.25 | -1.51 | Down | 1.00E-04 |
| CerG1(d45:1)       | 853.7 | 30.18 | 29.13 | 1.66 | 2.75 | 28.04 | 23.67 | 32.30 | 31.71 | -1.04 | Down | 3.56E-01 |
| CerG1(d45:1+hO+O)  | 885.7 | 27.48 | 26.86 | 0.86 | 3.42 | 25.42 | 18.25 | 28.54 | 30.22 | -1.02 | Down | 7.12E-01 |
| CerG1(d45:2)       | 851.7 | 29.85 | 30.56 | 1.07 | 1.58 | 26.99 | 28.23 | 31.33 | 32.55 | 1.02  | Up   | 7.93E-02 |
| CerG1(d45:3)       | 849.7 | 21.43 | 27.25 | 8.60 | 1.86 | 2.63  | 24.39 | 27.97 | 29.94 | 1.27  | Up   | 1.04E-01 |
| CerG1(d45:4+pO)    | 863.7 | 18.04 | 26.58 | 7.93 | 1.25 | 2.63  | 24.27 | 26.95 | 28.31 | 1.47  | Up   | 5.10E-03 |
| CerG1(d45:5+pO)    | 861.7 | 22.73 | 26.42 | 3.66 | 1.34 | 15.20 | 23.88 | 26.13 | 28.40 | 1.16  | Up   | 1.10E-03 |
| CerG1(d46:0)       | 869.8 | 25.28 | 30.45 | 7.55 | 1.08 | 15.06 | 28.46 | 31.45 | 32.14 | 1.2   | Up   | 2.81E-01 |
| CerG1(d46:0+pO+O)  | 901.8 | 13.55 | 15.36 | 9.12 | 0.94 | 2.63  | 14.75 | 23.73 | 18.25 | 1.13  | Up   | 6.89E-01 |
| CerG1(d46:1)       | 867.8 | 26.14 | 29.15 | 2.42 | 3.85 | 21.94 | 18.25 | 29.12 | 32.70 | 1.12  | Up   | 7.00E-03 |
| CerG1(d46:2)       | 865.7 | 23.85 | 15.36 | 7.16 | 0.94 | 2.63  | 14.75 | 28.81 | 18.25 | -1.55 | Down | 4.00E-04 |
| CerG1(d46:3+pO)    | 879.7 | 16.27 | 15.36 | 9.16 | 0.94 | 2.63  | 14.75 | 26.09 | 18.25 | -1.06 | Down | 7.91E-02 |
| CerG1(d46:4)       | 861.7 | 16.27 | 15.36 | 9.16 | 0.94 | 2.63  | 14.75 | 26.09 | 18.25 | -1.06 | Down | 7.91E-02 |
| CerG1(d46:5+pO)    | 875.7 | 26.52 | 28.10 | 1.27 | 1.45 | 23.83 | 26.13 | 28.81 | 30.25 | 1.06  | Up   | 1.13E-02 |

|                   |       |       |       |      |      |       |       |       |       |       |      |          |
|-------------------|-------|-------|-------|------|------|-------|-------|-------|-------|-------|------|----------|
| CerG1(d47:0)      | 883.8 | 34.86 | 29.06 | 0.97 | 3.62 | 33.37 | 22.11 | 36.45 | 34.38 | -1.2  | Down | 1.00E-04 |
| CerG1(d47:0+O)    | 899.8 | 26.29 | 23.38 | 1.03 | 3.95 | 24.09 | 14.97 | 28.52 | 30.06 | -1.12 | Down | 8.60E-03 |
| CerG1(d47:1)      | 881.8 | 33.59 | 27.09 | 0.86 | 3.27 | 32.30 | 22.30 | 35.26 | 31.87 | -1.24 | Down | 1.00E-04 |
| CerG1(d47:1+hO+O) | 913.8 | 22.16 | 24.95 | 1.85 | 1.48 | 19.19 | 21.76 | 25.47 | 26.60 | 1.13  | Up   | 6.00E-04 |
| CerG1(d47:1+O)    | 897.8 | 24.06 | 29.04 | 1.25 | 2.20 | 22.09 | 25.28 | 26.04 | 31.42 | 1.21  | Up   | 1.00E-04 |
| CerG1(d47:1+pO)   | 897.8 | 23.88 | 15.36 | 1.66 | 0.94 | 21.78 | 14.75 | 27.49 | 18.25 | -1.55 | Down | 1.00E-04 |
| CerG1(d47:2)      | 879.8 | 30.01 | 25.19 | 2.18 | 2.41 | 26.51 | 18.25 | 32.70 | 28.59 | -1.19 | Down | 1.00E-04 |
| CerG1(d47:3)      | 877.7 | 25.14 | 27.62 | 5.67 | 2.24 | 16.06 | 23.50 | 29.98 | 30.65 | 1.1   | Up   | 7.12E-01 |
| CerG1(d47:5+pO)   | 889.7 | 25.64 | 27.09 | 3.43 | 1.64 | 18.63 | 23.38 | 28.83 | 28.77 | 1.06  | Up   | 5.80E-01 |
| CerG1(d47:6)      | 871.7 | 24.44 | 26.95 | 4.61 | 1.76 | 16.42 | 23.06 | 29.22 | 28.72 | 1.1   | Up   | 3.16E-01 |
| CerG1(d47:6+pO)   | 887.7 | 21.89 | 26.12 | 2.42 | 1.51 | 18.47 | 23.30 | 25.23 | 28.22 | 1.19  | Up   | 1.00E-04 |
| CerG1(d48:1)      | 895.8 | 30.53 | 31.55 | 1.03 | 1.76 | 29.08 | 27.44 | 31.68 | 33.89 | 1.03  | Up   | 5.24E-02 |
| CerG1(d48:2)      | 893.8 | 28.32 | 28.47 | 1.14 | 3.74 | 26.05 | 18.25 | 29.71 | 31.96 | 1.01  | Up   | 4.60E-01 |
| CerG1(d48:3)      | 891.8 | 28.17 | 26.85 | 1.63 | 1.82 | 26.51 | 22.57 | 30.68 | 29.46 | -1.05 | Down | 1.04E-01 |
| CerG1(d48:5+pO)   | 903.7 | 20.05 | 15.36 | 7.15 | 0.94 | 2.63  | 14.75 | 25.07 | 18.25 | -1.31 | Down | 1.93E-02 |
| CerG1(d48:6)      | 885.7 | 18.62 | 15.36 | 9.04 | 0.94 | 2.63  | 14.75 | 25.23 | 18.25 | -1.21 | Down | 7.93E-02 |
| CerG1(d49:0)      | 911.8 | 35.30 | 29.75 | 0.30 | 3.55 | 34.86 | 23.68 | 35.78 | 35.04 | -1.19 | Down | 2.00E-04 |
| CerG1(d49:0+O)    | 927.8 | 26.29 | 22.84 | 1.03 | 4.56 | 24.00 | 14.86 | 27.88 | 29.47 | -1.15 | Down | 2.53E-02 |
| CerG1(d49:1)      | 909.8 | 35.56 | 28.78 | 0.61 | 3.75 | 34.63 | 22.60 | 36.45 | 34.86 | -1.24 | Down | 1.00E-04 |
| CerG1(d49:1+hO+O) | 941.8 | 18.03 | 15.36 | 1.82 | 0.94 | 13.70 | 14.75 | 19.50 | 18.25 | -1.17 | Down | 1.00E-03 |
| CerG1(d49:1+O)    | 925.8 | 18.81 | 31.21 | 2.74 | 1.41 | 12.42 | 28.77 | 21.95 | 33.70 | 1.66  | Up   | 1.00E-04 |
| CerG1(d49:1+pO)   | 925.8 | 27.32 | 24.81 | 1.01 | 3.74 | 24.75 | 20.80 | 28.71 | 31.55 | -1.1  | Down | 5.12E-02 |
| CerG1(d49:2)      | 907.8 | 35.01 | 25.90 | 1.04 | 2.47 | 33.63 | 22.50 | 36.45 | 30.06 | -1.35 | Down | 1.00E-04 |
| CerG1(d49:2+pO)   | 923.8 | 26.17 | 15.36 | 3.40 | 0.94 | 21.30 | 14.75 | 29.24 | 18.25 | -1.7  | Down | 1.00E-04 |
| CerG1(d49:3)      | 905.8 | 28.56 | 30.87 | 5.56 | 1.78 | 18.45 | 28.57 | 33.37 | 33.80 | 1.08  | Up   | 1.00E+00 |
| CerG1(d49:4)      | 903.8 | 27.15 | 27.31 | 1.84 | 2.54 | 23.87 | 21.57 | 29.07 | 30.27 | 1.01  | Up   | 8.61E-01 |
| CerG1(d50:1)      | 923.8 | 30.30 | 30.62 | 0.66 | 1.22 | 29.50 | 27.97 | 31.19 | 32.62 | 1.01  | Up   | 4.44E-01 |
| CerG1(d50:2)      | 921.8 | 29.38 | 29.71 | 0.91 | 3.80 | 28.09 | 18.25 | 30.85 | 32.91 | 1.01  | Up   | 6.92E-02 |
| CerG1(d50:3)      | 919.8 | 25.36 | 27.78 | 3.58 | 2.16 | 20.03 | 25.16 | 28.54 | 30.35 | 1.1   | Up   | 5.95E-02 |
| CerG1(d50:4)      | 917.8 | 22.70 | 23.39 | 5.13 | 2.93 | 15.69 | 18.25 | 29.02 | 28.25 | 1.03  | Up   | 6.89E-01 |
| CerG1(d50:6)      | 913.7 | 23.33 | 27.62 | 6.42 | 3.26 | 12.72 | 18.25 | 28.67 | 31.33 | 1.18  | Up   | 6.04E-02 |
| CerG1(d51:0)      | 939.8 | 34.46 | 26.13 | 1.16 | 3.33 | 33.13 | 21.38 | 36.45 | 30.77 | -1.32 | Down | 1.00E-04 |
| CerG1(d51:0+pO)   | 955.8 | 23.50 | 26.19 | 2.01 | 1.53 | 19.43 | 23.29 | 25.80 | 29.04 | 1.11  | Up   | 1.50E-03 |
| CerG1(d51:1)      | 937.8 | 34.43 | 27.82 | 0.33 | 3.34 | 33.80 | 22.02 | 34.86 | 34.45 | -1.24 | Down | 1.00E-04 |
| CerG1(d51:1+O)    | 953.8 | 21.69 | 19.50 | 3.16 | 4.45 | 18.18 | 14.75 | 26.23 | 27.30 | -1.11 | Down | 1.93E-01 |
| CerG1(d51:1+pO)   | 953.8 | 24.76 | 15.36 | 1.08 | 0.94 | 23.06 | 14.75 | 25.79 | 18.25 | -1.61 | Down | 1.00E-04 |
| CerG1(d51:2)      | 935.8 | 34.27 | 26.96 | 0.52 | 5.09 | 33.63 | 15.07 | 35.04 | 33.13 | -1.27 | Down | 4.00E-04 |
| CerG1(d51:3)      | 933.8 | 33.77 | 34.02 | 0.75 | 1.48 | 31.93 | 31.40 | 34.45 | 35.78 | 1.01  | Up   | 4.79E-01 |

|                   |       |       |       |       |      |       |       |       |       |       |      |          |
|-------------------|-------|-------|-------|-------|------|-------|-------|-------|-------|-------|------|----------|
| CerG1(d51:3+pO)   | 949.8 | 22.25 | 15.36 | 1.89  | 0.94 | 19.08 | 14.75 | 25.15 | 18.25 | -1.45 | Down | 1.00E-04 |
| CerG1(d51:4)      | 931.8 | 26.97 | 31.78 | 7.61  | 1.81 | 16.03 | 28.52 | 33.23 | 34.10 | 1.18  | Up   | 3.40E-01 |
| CerG1(d51:5)      | 929.8 | 24.54 | 15.36 | 6.25  | 0.94 | 13.54 | 14.75 | 29.78 | 18.25 | -1.6  | Down | 1.20E-03 |
| CerG1(d52:0)      | 953.9 | 28.34 | 18.03 | 1.93  | 3.19 | 23.74 | 14.97 | 30.88 | 22.53 | -1.57 | Down | 1.00E-04 |
| CerG1(d52:4)      | 945.8 | 27.51 | 15.36 | 1.54  | 0.94 | 24.62 | 14.75 | 29.80 | 18.25 | -1.79 | Down | 1.00E-04 |
| CerG1(d52:6)      | 941.8 | 21.85 | 28.48 | 2.84  | 1.89 | 15.73 | 26.10 | 25.72 | 33.13 | 1.3   | Up   | 1.00E-04 |
| CerG1(d53:0)      | 967.9 | 24.49 | 28.36 | 9.66  | 5.64 | 4.21  | 15.07 | 32.55 | 31.93 | 1.16  | Up   | 7.86E-01 |
| CerG1(d53:1)      | 965.9 | 32.59 | 28.16 | 0.92  | 4.80 | 30.68 | 15.07 | 34.63 | 34.45 | -1.16 | Down | 8.00E-04 |
| CerG1(d53:2)      | 963.8 | 13.81 | 19.77 | 7.96  | 4.46 | 2.63  | 15.00 | 25.47 | 26.62 | 1.43  | Up   | 1.31E-01 |
| CerG1(d53:3)      | 961.8 | 31.73 | 32.00 | 0.56  | 1.26 | 30.79 | 29.32 | 32.70 | 34.10 | 1.01  | Up   | 5.06E-01 |
| CerG1(d53:6)      | 955.8 | 24.81 | 29.20 | 5.19  | 1.59 | 16.12 | 27.02 | 29.04 | 31.93 | 1.18  | Up   | 3.74E-02 |
| CerG1(d54:0)      | 981.9 | 22.35 | 15.36 | 4.21  | 0.94 | 16.47 | 14.75 | 27.65 | 18.25 | -1.46 | Down | 1.00E-04 |
| CerG1(d54:1)      | 979.9 | 26.57 | 15.36 | 1.77  | 0.94 | 21.55 | 14.75 | 27.90 | 18.25 | -1.73 | Down | 1.00E-04 |
| CerG1(d54:5)      | 971.8 | 21.95 | 15.36 | 4.75  | 0.94 | 16.53 | 14.75 | 28.27 | 18.25 | -1.43 | Down | 1.00E-04 |
| CerG1(d55:0)      | 995.9 | 27.69 | 15.36 | 2.07  | 0.94 | 24.37 | 14.75 | 30.30 | 18.25 | -1.8  | Down | 1.00E-04 |
| CerG1(d55:1)      | 993.9 | 27.42 | 15.36 | 2.67  | 0.94 | 24.38 | 14.75 | 31.06 | 18.25 | -1.78 | Down | 1.00E-04 |
| CerG1(d55:2)      | 991.9 | 29.67 | 26.07 | 0.87  | 2.66 | 27.90 | 21.23 | 30.92 | 29.88 | -1.14 | Down | 6.00E-04 |
| CerG1(d55:3)      | 989.9 | 21.00 | 30.14 | 5.98  | 1.10 | 15.36 | 28.54 | 29.98 | 31.91 | 1.43  | Up   | 3.00E-04 |
| CerG1(d56:0EO)    | 1040  | 20.74 | 15.36 | 1.68  | 0.94 | 16.19 | 14.75 | 22.61 | 18.25 | -1.35 | Down | 1.00E-04 |
| CerG1(d56:1)      | 1008  | 13.45 | 15.36 | 10.72 | 0.94 | 2.63  | 14.75 | 26.55 | 18.25 | 1.14  | Up   | 6.88E-01 |
| CerG1(d56:1EO)    | 1038  | 24.47 | 25.02 | 0.63  | 2.40 | 23.80 | 18.25 | 26.00 | 26.77 | 1.02  | Up   | 8.48E-02 |
| CerG1(d57:0EO)    | 1054  | 21.80 | 15.36 | 2.18  | 0.94 | 16.42 | 14.75 | 24.29 | 18.25 | -1.42 | Down | 1.00E-04 |
| CerG1(d57:1)      | 1022  | 25.43 | 15.36 | 3.41  | 0.94 | 20.43 | 14.75 | 29.94 | 18.25 | -1.66 | Down | 1.00E-04 |
| CerG1(d57:1+pOEO) | 1068  | 13.10 | 15.36 | 7.73  | 0.94 | 2.63  | 14.75 | 22.60 | 18.25 | 1.17  | Up   | 4.79E-01 |
| CerG1(d57:1EO)    | 1052  | 24.32 | 24.92 | 0.98  | 2.45 | 23.27 | 18.25 | 26.23 | 27.06 | 1.02  | Up   | 7.92E-02 |
| CerG1(d57:3)      | 1018  | 28.08 | 18.47 | 1.44  | 4.37 | 25.53 | 14.75 | 30.06 | 27.51 | -1.52 | Down | 1.00E-04 |
| CerG1(d57:3+pO)   | 1034  | 16.72 | 15.36 | 5.31  | 0.94 | 2.63  | 14.75 | 22.65 | 18.25 | -1.09 | Down | 3.60E-03 |
| CerG1(d57:4)      | 1016  | 22.83 | 15.36 | 4.22  | 0.94 | 15.50 | 14.75 | 28.62 | 18.25 | -1.49 | Down | 1.00E-04 |
| CerG1(d58:0+pOEO) | 1084  | 21.42 | 25.50 | 3.93  | 0.90 | 13.03 | 24.16 | 24.74 | 27.08 | 1.19  | Up   | 1.00E-04 |
| CerG1(d58:0EO)    | 1068  | 23.94 | 25.63 | 0.86  | 1.41 | 22.85 | 22.99 | 25.21 | 27.87 | 1.07  | Up   | 2.40E-03 |
| CerG1(d58:1EO)    | 1066  | 25.21 | 26.57 | 0.61  | 0.96 | 24.39 | 24.89 | 26.54 | 27.74 | 1.05  | Up   | 6.00E-04 |
| CerG1(d58:2EO)    | 1064  | 24.98 | 25.07 | 0.94  | 3.40 | 23.78 | 15.59 | 26.93 | 27.60 | 1     | Up   | 1.86E-01 |
| CerG1(d58:3+pO)   | 1048  | 19.29 | 15.36 | 2.23  | 0.94 | 14.10 | 14.75 | 22.46 | 18.25 | -1.26 | Down | 5.00E-04 |
| CerG1(d58:3EO)    | 1062  | 14.59 | 15.36 | 7.12  | 0.94 | 2.63  | 14.75 | 22.63 | 18.25 | 1.05  | Up   | 1.34E-01 |
| CerG1(d58:4+pO)   | 1046  | 17.70 | 15.36 | 5.68  | 0.94 | 2.63  | 14.75 | 23.84 | 18.25 | -1.15 | Down | 1.70E-03 |
| CerG1(d58:5+pO)   | 1044  | 10.58 | 15.36 | 6.74  | 0.94 | 2.63  | 14.75 | 18.61 | 18.25 | 1.45  | Up   | 1.02E-01 |
| CerG1(d58:6+hO)   | 1042  | 9.78  | 15.36 | 5.35  | 0.94 | 2.63  | 14.75 | 17.05 | 18.25 | 1.57  | Up   | 8.00E-04 |
| CerG1(d59:0+pOEO) | 1098  | 15.37 | 15.36 | 8.67  | 0.94 | 2.63  | 14.75 | 24.95 | 18.25 | -1    | Down | 1.66E-01 |



|                     |       |       |       |       |      |       |       |       |       |       |      |          |
|---------------------|-------|-------|-------|-------|------|-------|-------|-------|-------|-------|------|----------|
| CerG1(d59:1EO)      | 1080  | 23.80 | 24.87 | 0.57  | 2.30 | 23.01 | 18.25 | 25.00 | 26.54 | 1.04  | Up   | 8.60E-03 |
| CerG1(d59:2EO)      | 1078  | 23.36 | 23.85 | 1.28  | 3.55 | 21.17 | 15.59 | 25.79 | 26.88 | 1.02  | Up   | 1.34E-01 |
| CerG1(d59:3+pO)     | 1062  | 22.82 | 15.36 | 1.21  | 0.94 | 20.80 | 14.75 | 25.30 | 18.25 | -1.49 | Down | 1.00E-04 |
| CerG1(d59:6+pO)     | 1056  | 16.78 | 15.36 | 7.67  | 0.94 | 2.63  | 14.75 | 24.35 | 18.25 | -1.09 | Down | 2.89E-02 |
| CerG1(d60:0+pOEO)   | 1112  | 19.45 | 15.36 | 8.41  | 0.94 | 2.63  | 14.75 | 24.02 | 18.25 | -1.27 | Down | 1.06E-02 |
| CerG1(d60:0EO)      | 1096  | 13.35 | 15.36 | 7.95  | 0.94 | 2.63  | 14.75 | 21.88 | 18.25 | 1.15  | Up   | 6.01E-01 |
| CerG1(d60:1+pO)     | 1080  | 15.52 | 15.36 | 2.71  | 0.94 | 8.17  | 14.75 | 18.27 | 18.25 | -1.01 | Down | 1.90E-01 |
| CerG1(d60:1+pOEO)   | 1110  | 19.25 | 24.26 | 8.66  | 2.16 | 2.63  | 18.25 | 24.93 | 26.29 | 1.26  | Up   | 7.41E-02 |
| CerG1(d60:2)        | 1062  | 16.56 | 15.36 | 1.48  | 0.94 | 14.50 | 14.75 | 19.01 | 18.25 | -1.08 | Down | 5.12E-02 |
| CerG1(d60:3+pO)     | 1076  | 23.72 | 24.10 | 1.15  | 3.44 | 21.63 | 15.59 | 25.12 | 26.51 | 1.02  | Up   | 1.50E-02 |
| CerG1(d60:4+pO)     | 1074  | 23.01 | 15.36 | 1.26  | 0.94 | 20.70 | 14.75 | 24.79 | 18.25 | -1.5  | Down | 1.00E-04 |
| CerG1(d62:2+pOEO)   | 1136  | 15.25 | 15.36 | 8.39  | 0.94 | 2.63  | 14.75 | 24.65 | 18.25 | 1.01  | Up   | 3.40E-01 |
| CerG1(d62:2EO)      | 1120  | 16.89 | 15.36 | 5.76  | 0.94 | 2.63  | 14.75 | 24.04 | 18.25 | -1.1  | Down | 3.91E-02 |
| CerG1(d64:1EO)      | 1150  | 9.36  | 15.36 | 7.24  | 0.94 | 2.63  | 14.75 | 18.47 | 18.25 | 1.64  | Up   | 2.16E-01 |
| CerG1(d65:3)        | 1130  | 14.81 | 15.36 | 7.86  | 0.94 | 2.63  | 14.75 | 22.99 | 18.25 | 1.04  | Up   | 1.17E-01 |
| CerG1(d67:0EO)      | 1194  | 11.40 | 15.36 | 9.37  | 0.94 | 2.63  | 14.75 | 23.68 | 18.25 | 1.35  | Up   | 6.88E-01 |
| CerG1(d68:1EO)      | 1206  | 9.86  | 20.84 | 9.23  | 2.87 | 2.63  | 15.58 | 23.86 | 23.65 | 2.11  | Up   | 1.22E-02 |
| CerG1(d68:2EO)      | 1204  | 7.31  | 18.32 | 7.14  | 3.39 | 2.63  | 15.00 | 20.45 | 22.56 | 2.51  | Up   | 3.20E-03 |
| CerG1(d73:2+pOEO)   | 1290  | 15.72 | 18.54 | 5.77  | 3.78 | 4.21  | 14.97 | 24.22 | 25.20 | 1.18  | Up   | 5.66E-01 |
| CerG1(d74:2EO)      | 1288  | 7.39  | 15.36 | 5.77  | 0.94 | 2.63  | 14.75 | 15.94 | 18.25 | 2.08  | Up   | 4.00E-03 |
| CerG1(d77:1EO)      | 1332  | 18.55 | 23.94 | 3.40  | 4.96 | 14.61 | 15.11 | 23.50 | 28.76 | 1.29  | Up   | 8.60E-03 |
| CerG1(d77:4EO)      | 1326  | 18.57 | 20.68 | 8.65  | 5.39 | 2.63  | 15.00 | 29.14 | 28.69 | 1.11  | Up   | 7.86E-01 |
| CerG1(d81:3+hOEO)   | 1400  | 10.96 | 15.36 | 11.55 | 0.94 | 2.63  | 14.75 | 36.45 | 18.25 | 1.4   | Up   | 2.79E-01 |
| CerG1(d83:0EO)      | 1418  | 19.44 | 15.36 | 8.10  | 0.94 | 2.63  | 14.75 | 26.21 | 18.25 | -1.27 | Down | 1.06E-02 |
| CerG1(d85:2EO)      | 1442  | 17.95 | 21.01 | 8.06  | 4.01 | 2.63  | 14.95 | 24.55 | 26.29 | 1.17  | Up   | 5.18E-01 |
| CerG2(d15:0+pO)     | 613.3 | 18.55 | 22.62 | 2.91  | 2.18 | 14.98 | 18.25 | 24.08 | 26.44 | 1.22  | Up   | 1.00E-03 |
| CerG2(d18:0)        | 639.4 | 22.64 | 21.27 | 2.83  | 2.91 | 17.39 | 15.58 | 27.69 | 25.18 | -1.06 | Down | 6.01E-01 |
| CerG2(d18:0+pO)     | 655.4 | 10.53 | 15.36 | 5.76  | 0.94 | 2.63  | 14.75 | 15.57 | 18.25 | 1.46  | Up   | 6.91E-02 |
| CerG2(d18:1/16:0)   | 861.6 | 22.04 | 24.38 | 1.25  | 2.06 | 20.61 | 18.25 | 24.39 | 26.23 | 1.11  | Up   | 7.00E-04 |
| CerG2(d18:1/18:0)   | 889.6 | 23.43 | 24.59 | 2.43  | 2.16 | 17.20 | 18.25 | 26.56 | 27.11 | 1.05  | Up   | 7.93E-02 |
| CerG2(d18:1/18:0+O) | 905.6 | 13.51 | 15.36 | 6.81  | 0.94 | 2.63  | 14.75 | 23.27 | 18.25 | 1.14  | Up   | 1.40E-01 |
| CerG2(d18:1/24:1)   | 971.7 | 20.86 | 25.17 | 5.75  | 2.22 | 12.77 | 18.25 | 25.84 | 26.69 | 1.21  | Up   | 1.50E-03 |
| CerG2(d18:1+hO)     | 653.4 | 10.52 | 15.36 | 7.14  | 0.94 | 2.63  | 14.75 | 23.43 | 18.25 | 1.46  | Up   | 5.61E-02 |
| CerG2(d19:0)        | 653.4 | 5.52  | 15.36 | 5.34  | 0.94 | 2.63  | 14.75 | 16.49 | 18.25 | 2.78  | Up   | 6.60E-03 |
| CerG2(d19:1+hO)     | 667.4 | 20.33 | 20.05 | 1.56  | 3.83 | 17.97 | 14.97 | 22.70 | 24.62 | -1.01 | Down | 6.51E-01 |
| CerG2(d20:2)        | 663.4 | 17.98 | 23.02 | 2.39  | 2.65 | 13.22 | 15.58 | 21.28 | 26.84 | 1.28  | Up   | 1.00E-04 |
| CerG2(d26:0)        | 751.5 | 13.19 | 15.36 | 8.44  | 0.94 | 2.63  | 14.75 | 22.85 | 18.25 | 1.16  | Up   | 8.29E-01 |
| CerG2(d27:0)        | 765.5 | 18.90 | 24.00 | 2.53  | 1.70 | 13.64 | 22.50 | 23.16 | 28.50 | 1.27  | Up   | 1.00E-04 |

|                    |       |       |       |       |      |       |       |       |       |       |      |          |
|--------------------|-------|-------|-------|-------|------|-------|-------|-------|-------|-------|------|----------|
| CerG2(d27:0+O)     | 781.5 | 18.15 | 15.36 | 4.20  | 0.94 | 10.99 | 14.75 | 27.73 | 18.25 | -1.18 | Down | 2.80E-03 |
| CerG2(d28:0)       | 779.5 | 23.59 | 26.78 | 3.39  | 2.74 | 17.48 | 18.25 | 26.47 | 28.42 | 1.13  | Up   | 2.00E-04 |
| CerG2(d28:0+pO)    | 795.5 | 19.41 | 22.23 | 2.06  | 1.57 | 15.79 | 18.25 | 23.46 | 24.18 | 1.15  | Up   | 1.30E-03 |
| CerG2(d28:1+pO+2O) | 825.5 | 8.80  | 15.36 | 8.07  | 0.94 | 2.63  | 14.75 | 22.63 | 18.25 | 1.75  | Up   | 1.03E-02 |
| CerG2(d29:0+2O)    | 825.5 | 15.68 | 15.36 | 6.49  | 0.94 | 2.63  | 14.75 | 19.57 | 18.25 | -1.02 | Down | 1.63E-02 |
| CerG2(d29:0+pO)    | 809.6 | 18.28 | 23.64 | 2.30  | 1.78 | 14.08 | 21.76 | 22.30 | 28.40 | 1.29  | Up   | 1.00E-04 |
| CerG2(d29:0+pO+2O) | 841.5 | 15.52 | 15.36 | 8.32  | 0.94 | 2.63  | 14.75 | 21.59 | 18.25 | -1.01 | Down | 6.92E-02 |
| CerG2(d30:2)       | 803.5 | 21.42 | 29.91 | 3.69  | 2.43 | 17.97 | 26.53 | 28.09 | 35.78 | 1.4   | Up   | 1.00E-04 |
| CerG2(d30:3)       | 801.5 | 15.56 | 21.93 | 6.54  | 3.36 | 2.63  | 15.11 | 19.87 | 25.84 | 1.41  | Up   | 3.50E-03 |
| CerG2(d30:4+pO)    | 815.5 | 13.60 | 15.36 | 5.73  | 0.94 | 2.63  | 14.75 | 19.10 | 18.25 | 1.13  | Up   | 9.75E-01 |
| CerG2(d31:1+pO+2O) | 867.6 | 4.27  | 15.36 | 3.97  | 0.94 | 2.63  | 14.75 | 15.83 | 18.25 | 3.6   | Up   | 6.00E-04 |
| CerG2(d31:2+2O)    | 849.5 | 9.91  | 15.36 | 10.07 | 0.94 | 2.63  | 14.75 | 27.09 | 18.25 | 1.55  | Up   | 6.81E-02 |
| CerG2(d31:3+pO)    | 831.5 | 6.64  | 17.39 | 5.12  | 2.89 | 2.63  | 14.75 | 15.52 | 21.28 | 2.62  | Up   | 2.00E-04 |
| CerG2(d32:2)       | 831.6 | 14.66 | 15.92 | 4.87  | 2.08 | 2.63  | 14.75 | 20.38 | 21.82 | 1.09  | Up   | 7.86E-01 |
| CerG2(d32:3+hO+2O) | 877.5 | 7.35  | 15.36 | 6.00  | 0.94 | 2.63  | 14.75 | 15.73 | 18.25 | 2.09  | Up   | 2.10E-03 |
| CerG2(d33:0+O)     | 865.6 | 18.90 | 23.53 | 6.28  | 1.93 | 2.63  | 18.25 | 24.10 | 25.82 | 1.25  | Up   | 1.00E-03 |
| CerG2(d33:1+O)     | 863.6 | 11.04 | 18.17 | 9.56  | 3.84 | 2.63  | 14.86 | 27.15 | 25.14 | 1.65  | Up   | 1.31E-01 |
| CerG2(d33:1+pO)    | 863.6 | 22.01 | 23.75 | 1.70  | 1.87 | 17.58 | 18.25 | 23.52 | 25.73 | 1.08  | Up   | 1.00E-03 |
| CerG2(d33:3+pO)    | 859.6 | 11.38 | 19.65 | 8.94  | 5.06 | 2.63  | 15.00 | 26.21 | 27.49 | 1.73  | Up   | 4.49E-02 |
| CerG2(d33:5+pO)    | 855.5 | 14.04 | 18.63 | 9.06  | 3.13 | 2.63  | 14.86 | 21.33 | 22.06 | 1.33  | Up   | 2.06E-01 |
| CerG2(d34:0)       | 863.6 | 18.82 | 15.36 | 6.08  | 0.94 | 2.63  | 14.75 | 22.86 | 18.25 | -1.23 | Down | 8.60E-03 |
| CerG2(d34:1+O)     | 877.6 | 13.25 | 21.64 | 7.13  | 1.22 | 2.63  | 18.25 | 18.91 | 23.13 | 1.63  | Up   | 1.00E-04 |
| CerG2(d34:2)       | 859.6 | 5.95  | 15.36 | 4.77  | 0.94 | 2.63  | 14.75 | 13.60 | 18.25 | 2.58  | Up   | 1.00E-04 |
| CerG2(d34:2+O)     | 875.6 | 23.14 | 15.36 | 3.34  | 0.94 | 17.20 | 14.75 | 27.87 | 18.25 | -1.51 | Down | 1.00E-04 |
| CerG2(d34:3)       | 857.6 | 11.65 | 15.36 | 9.58  | 0.94 | 2.63  | 14.75 | 27.89 | 18.25 | 1.32  | Up   | 1.85E-01 |
| CerG2(d34:3+2O)    | 889.6 | 6.32  | 15.36 | 4.58  | 0.94 | 2.63  | 14.75 | 15.91 | 18.25 | 2.43  | Up   | 7.00E-04 |
| CerG2(d34:4)       | 855.6 | 12.80 | 15.36 | 8.15  | 0.94 | 2.63  | 14.75 | 23.61 | 18.25 | 1.2   | Up   | 8.78E-01 |
| CerG2(d34:6+pO)    | 867.5 | 23.69 | 25.60 | 1.24  | 2.48 | 22.04 | 23.15 | 26.47 | 32.25 | 1.08  | Up   | 1.64E-02 |
| CerG2(d35:0+O)     | 893.6 | 15.25 | 15.36 | 8.42  | 0.94 | 2.63  | 14.75 | 23.42 | 18.25 | 1.01  | Up   | 2.81E-01 |
| CerG2(d35:1+hO+O)  | 907.6 | 5.21  | 15.36 | 4.66  | 0.94 | 2.63  | 14.75 | 15.00 | 18.25 | 2.95  | Up   | 1.00E-04 |
| CerG2(d35:1+O)     | 891.6 | 17.77 | 15.36 | 6.34  | 0.94 | 2.63  | 14.75 | 23.45 | 18.25 | -1.16 | Down | 2.88E-01 |
| CerG2(d35:2+hO)    | 889.6 | 13.53 | 15.36 | 6.01  | 0.94 | 2.63  | 14.75 | 21.45 | 18.25 | 1.13  | Up   | 2.55E-01 |
| CerG2(d35:2+pO+2O) | 921.6 | 5.02  | 15.36 | 4.26  | 0.94 | 2.63  | 14.75 | 14.08 | 18.25 | 3.06  | Up   | 1.00E-04 |
| CerG2(d35:3+2O)    | 903.6 | 6.11  | 15.36 | 5.84  | 0.94 | 2.63  | 14.75 | 19.38 | 18.25 | 2.51  | Up   | 8.00E-04 |
| CerG2(d36:0+O)     | 907.7 | 9.62  | 15.36 | 5.96  | 0.94 | 2.63  | 14.75 | 17.08 | 18.25 | 1.6   | Up   | 7.40E-03 |
| CerG2(d36:2+hO+2O) | 935.6 | 7.18  | 15.36 | 5.46  | 0.94 | 2.63  | 14.75 | 15.11 | 18.25 | 2.14  | Up   | 3.00E-04 |
| CerG2(d36:4+2O)    | 915.6 | 5.41  | 15.88 | 3.98  | 1.90 | 2.63  | 14.75 | 13.72 | 21.13 | 2.94  | Up   | 1.00E-04 |
| CerG2(d37:2+pO)    | 917.6 | 14.46 | 22.49 | 8.12  | 3.42 | 2.63  | 14.95 | 22.02 | 28.47 | 1.56  | Up   | 2.80E-03 |

|                    |       |       |       |      |      |       |       |       |       |       |      |          |
|--------------------|-------|-------|-------|------|------|-------|-------|-------|-------|-------|------|----------|
| CerG2(d37:4+pO)    | 913.6 | 7.03  | 15.36 | 5.92 | 0.94 | 2.63  | 14.75 | 17.94 | 18.25 | 2.19  | Up   | 9.00E-04 |
| CerG2(d38:0+pO+2O) | 967.7 | 6.01  | 15.36 | 5.36 | 0.94 | 2.63  | 14.75 | 17.04 | 18.25 | 2.56  | Up   | 7.00E-04 |
| CerG2(d38:2+O)     | 931.7 | 8.37  | 15.36 | 7.10 | 0.94 | 2.63  | 14.75 | 18.07 | 18.25 | 1.84  | Up   | 1.84E-01 |
| CerG2(d38:2+pO+2O) | 963.6 | 6.81  | 15.36 | 6.21 | 0.94 | 2.63  | 14.75 | 17.10 | 18.25 | 2.26  | Up   | 4.36E-02 |
| CerG2(d38:3+2O)    | 945.6 | 5.38  | 15.36 | 3.93 | 0.94 | 2.63  | 14.75 | 13.28 | 18.25 | 2.86  | Up   | 1.00E-04 |
| CerG2(d38:4+2O)    | 943.6 | 7.55  | 15.36 | 6.01 | 0.94 | 2.63  | 14.75 | 17.02 | 18.25 | 2.03  | Up   | 9.00E-04 |
| CerG2(d38:5+pO)    | 925.6 | 6.91  | 15.36 | 6.40 | 0.94 | 2.63  | 14.75 | 17.76 | 18.25 | 2.22  | Up   | 3.22E-02 |
| CerG2(d38:6+pO)    | 923.6 | 20.79 | 15.36 | 5.54 | 0.94 | 10.43 | 14.75 | 25.77 | 18.25 | -1.35 | Down | 1.06E-02 |
| CerG2(d39:0)       | 933.7 | 19.54 | 15.36 | 7.41 | 0.94 | 2.63  | 14.75 | 24.80 | 18.25 | -1.27 | Down | 2.88E-01 |
| CerG2(d39:0+O)     | 949.7 | 4.25  | 15.36 | 3.90 | 0.94 | 2.63  | 14.75 | 15.59 | 18.25 | 3.62  | Up   | 5.00E-04 |
| CerG2(d39:1)       | 931.7 | 9.20  | 15.36 | 6.90 | 0.94 | 2.63  | 14.75 | 19.88 | 18.25 | 1.67  | Up   | 8.70E-03 |
| CerG2(d39:3)       | 927.7 | 17.51 | 15.36 | 3.22 | 0.94 | 11.34 | 14.75 | 22.69 | 18.25 | -1.14 | Down | 1.88E-02 |
| CerG2(d39:6+hO)    | 937.6 | 5.25  | 15.36 | 4.78 | 0.94 | 2.63  | 14.75 | 15.78 | 18.25 | 2.92  | Up   | 7.00E-04 |
| CerG2(d39:7+hO)    | 935.6 | 9.44  | 15.36 | 6.32 | 0.94 | 2.63  | 14.75 | 16.51 | 18.25 | 1.63  | Up   | 3.33E-02 |
| CerG2(d40:2)       | 943.7 | 9.94  | 15.36 | 6.26 | 0.94 | 2.63  | 14.75 | 16.90 | 18.25 | 1.55  | Up   | 1.85E-01 |
| CerG2(d40:2+hO+O)  | 975.7 | 7.40  | 15.36 | 7.31 | 0.94 | 2.63  | 14.75 | 21.57 | 18.25 | 2.08  | Up   | 5.05E-02 |
| CerG2(d40:3)       | 941.7 | 9.79  | 23.59 | 9.05 | 2.63 | 2.63  | 18.25 | 22.49 | 27.95 | 2.41  | Up   | 3.00E-04 |
| CerG2(d41:1)       | 959.7 | 14.39 | 15.36 | 5.26 | 0.94 | 2.63  | 14.75 | 19.79 | 18.25 | 1.07  | Up   | 4.79E-01 |
| CerG2(d41:3+pO)    | 971.7 | 9.33  | 15.36 | 6.41 | 0.94 | 2.63  | 14.75 | 19.69 | 18.25 | 1.65  | Up   | 8.70E-03 |
| CerG2(d41:7+hO)    | 963.6 | 16.83 | 15.36 | 5.12 | 0.94 | 2.63  | 14.75 | 21.23 | 18.25 | -1.1  | Down | 1.88E-02 |
| CerG2(d43:0+pO+2O) | 1038  | 10.75 | 24.15 | 8.43 | 2.60 | 2.63  | 22.01 | 23.21 | 31.30 | 2.25  | Up   | 2.00E-04 |
| CerG2(d43:0+pO+O)  | 1022  | 8.84  | 15.36 | 6.56 | 0.94 | 2.63  | 14.75 | 17.53 | 18.25 | 1.74  | Up   | 8.98E-02 |
| CerG2(d43:4)       | 981.7 | 20.10 | 15.36 | 4.35 | 0.94 | 13.40 | 14.75 | 27.54 | 18.25 | -1.31 | Down | 5.60E-03 |
| CerG2(d44:1+O)     | 1018  | 7.55  | 15.36 | 4.99 | 0.94 | 2.63  | 14.75 | 14.01 | 18.25 | 2.03  | Up   | 1.00E-04 |
| CerG2(d44:6+pO)    | 1008  | 8.60  | 15.36 | 5.95 | 0.94 | 2.63  | 14.75 | 16.28 | 18.25 | 1.79  | Up   | 2.40E-03 |
| CerG2(d45:1)       | 1016  | 12.96 | 26.40 | 7.93 | 3.27 | 2.63  | 21.78 | 23.83 | 33.37 | 2.04  | Up   | 1.00E-04 |
| CerG2(d45:3)       | 1012  | 14.34 | 15.36 | 9.04 | 0.94 | 2.63  | 14.75 | 25.75 | 18.25 | 1.07  | Up   | 4.42E-01 |
| CerG2(d46:4+pO)    | 1040  | 17.06 | 22.59 | 7.33 | 2.81 | 2.63  | 15.11 | 25.79 | 25.97 | 1.32  | Up   | 1.16E-02 |
| CerG2(d46:6)       | 1020  | 9.34  | 15.36 | 6.46 | 0.94 | 2.63  | 14.75 | 16.26 | 18.25 | 1.64  | Up   | 8.60E-03 |
| CerG2(d49:0+O)     | 1090  | 16.09 | 20.77 | 9.12 | 3.73 | 2.63  | 14.97 | 23.06 | 24.44 | 1.29  | Up   | 1.66E-01 |
| CerG2(d49:4+pO)    | 1082  | 12.56 | 15.36 | 6.20 | 0.94 | 2.63  | 14.75 | 19.31 | 18.25 | 1.22  | Up   | 7.12E-01 |
| CerG2(d49:5+pO)    | 1080  | 8.91  | 15.36 | 6.49 | 0.94 | 2.63  | 14.75 | 18.14 | 18.25 | 1.72  | Up   | 4.49E-02 |
| CerG2(d49:8)       | 1058  | 7.11  | 15.36 | 5.39 | 0.94 | 2.63  | 14.75 | 15.20 | 18.25 | 2.16  | Up   | 5.00E-04 |
| CerG2(d50:6+pO)    | 1092  | 8.65  | 15.36 | 6.52 | 0.94 | 2.63  | 14.75 | 17.77 | 18.25 | 1.78  | Up   | 8.60E-03 |
| CerG2(d51:6)       | 1090  | 8.21  | 17.04 | 7.94 | 4.09 | 2.63  | 14.75 | 22.01 | 27.11 | 2.07  | Up   | 2.34E-02 |
| CerG2(d52:8)       | 1100  | 11.19 | 23.83 | 8.41 | 5.29 | 2.63  | 14.97 | 24.39 | 33.94 | 2.13  | Up   | 1.50E-03 |
| CerG2(d54:4)       | 1136  | 7.69  | 15.36 | 5.28 | 0.94 | 2.63  | 14.75 | 15.72 | 18.25 | 2     | Up   | 5.00E-03 |
| CerG2(d55:5+pO)    | 1164  | 16.31 | 15.36 | 6.56 | 0.94 | 2.63  | 14.75 | 24.09 | 18.25 | -1.06 | Down | 2.25E-02 |

|                      |       |       |       |      |      |       |       |       |       |       |      |          |
|----------------------|-------|-------|-------|------|------|-------|-------|-------|-------|-------|------|----------|
| CerG2(d55:6)         | 1146  | 21.85 | 23.72 | 1.72 | 1.22 | 17.53 | 21.50 | 24.19 | 26.25 | 1.09  | Up   | 6.40E-03 |
| CerG2(d55:7)         | 1144  | 21.33 | 15.36 | 1.97 | 0.94 | 16.05 | 14.75 | 23.50 | 18.25 | -1.39 | Down | 1.00E-04 |
| CerG2(d56:7)         | 1158  | 9.96  | 15.36 | 8.09 | 0.94 | 2.63  | 14.75 | 22.30 | 18.25 | 1.54  | Up   | 6.87E-02 |
| CerG2(d57:5+pO)      | 1192  | 15.13 | 15.36 | 7.47 | 0.94 | 2.63  | 14.75 | 23.48 | 18.25 | 1.02  | Up   | 3.47E-01 |
| CerG2(d57:6)         | 1174  | 15.01 | 22.82 | 7.40 | 2.79 | 2.63  | 15.59 | 23.54 | 27.90 | 1.52  | Up   | 1.70E-03 |
| CerG2(d57:6+pO)      | 1190  | 12.99 | 15.36 | 8.07 | 0.94 | 2.63  | 14.75 | 23.38 | 18.25 | 1.18  | Up   | 9.26E-01 |
| CerG2(d57:7)         | 1172  | 11.05 | 21.68 | 9.63 | 3.41 | 2.63  | 14.95 | 23.94 | 24.73 | 1.96  | Up   | 1.33E-02 |
| CerG2(d63:4+pO)      | 1278  | 8.93  | 18.01 | 7.74 | 3.99 | 2.63  | 14.86 | 23.56 | 26.65 | 2.02  | Up   | 8.30E-03 |
| CerG2(d70:4EO)       | 1390  | 25.10 | 26.13 | 0.82 | 2.86 | 24.16 | 18.25 | 26.81 | 28.54 | 1.04  | Up   | 1.50E-02 |
| CerG2(d71:2+pOEO)    | 1424  | 26.36 | 27.13 | 1.14 | 3.07 | 24.97 | 18.25 | 28.20 | 29.73 | 1.03  | Up   | 3.74E-02 |
| CerG2(d71:3EO)       | 1406  | 26.32 | 27.10 | 1.19 | 3.06 | 24.96 | 18.25 | 28.41 | 29.76 | 1.03  | Up   | 4.54E-02 |
| CerG2(d72:2+pOEO)    | 1438  | 20.45 | 20.99 | 6.10 | 3.86 | 2.63  | 14.95 | 24.77 | 25.97 | 1.03  | Up   | 8.33E-01 |
| CerG2(d73:4EO)       | 1432  | 9.05  | 20.56 | 8.17 | 3.49 | 2.63  | 14.95 | 21.32 | 24.03 | 2.27  | Up   | 1.20E-03 |
| CerG2(d74:4EO)       | 1446  | 26.13 | 25.00 | 2.02 | 4.12 | 21.21 | 15.59 | 28.97 | 28.92 | -1.05 | Down | 5.25E-01 |
| CerG2(d75:2+pOEO)    | 1480  | 22.72 | 25.67 | 7.86 | 3.10 | 2.63  | 18.25 | 27.87 | 29.07 | 1.13  | Up   | 4.87E-01 |
| CerG2(d75:3EO)       | 1462  | 27.16 | 26.38 | 1.77 | 3.35 | 23.16 | 18.25 | 30.04 | 29.94 | -1.03 | Down | 4.98E-01 |
| CerG2(d75:4EO)       | 1460  | 8.47  | 15.36 | 9.05 | 0.94 | 2.63  | 14.75 | 23.73 | 18.25 | 1.81  | Up   | 6.70E-02 |
| CerG2(d76:4EO)       | 1474  | 9.62  | 15.36 | 9.14 | 0.94 | 2.63  | 14.75 | 24.25 | 18.25 | 1.6   | Up   | 6.81E-02 |
| CerG2(d84:0+pOEO)    | 1610  | 18.91 | 15.36 | 8.75 | 0.94 | 2.63  | 14.75 | 25.69 | 18.25 | -1.23 | Down | 1.50E-02 |
| CerG2GNAc1(d16:0+pO) | 830.4 | 6.71  | 15.36 | 6.08 | 0.94 | 2.63  | 14.75 | 17.36 | 18.25 | 2.29  | Up   | 6.90E-03 |
| CerG2GNAc1(d16:1+hO) | 828.4 | 23.06 | 21.65 | 3.80 | 4.93 | 15.40 | 14.97 | 28.79 | 28.88 | -1.07 | Down | 4.51E-01 |
| CerG2GNAc1(d18:0)    | 842.5 | 13.95 | 22.42 | 7.56 | 1.46 | 2.63  | 18.25 | 20.47 | 24.00 | 1.61  | Up   | 2.00E-04 |
| CerG2GNAc1(d18:0+pO) | 858.5 | 7.14  | 15.36 | 7.10 | 0.94 | 2.63  | 14.75 | 18.28 | 18.25 | 2.15  | Up   | 4.93E-02 |
| CerG2GNAc1(d18:1)    | 840.4 | 11.15 | 15.36 | 5.62 | 0.94 | 2.63  | 14.75 | 16.03 | 18.25 | 1.38  | Up   | 6.02E-02 |
| CerG2GNAc1(d19:0)    | 856.5 | 20.16 | 24.90 | 4.19 | 2.60 | 15.42 | 18.25 | 27.89 | 28.85 | 1.24  | Up   | 1.56E-02 |
| CerG2GNAc1(d19:1)    | 854.5 | 5.10  | 15.36 | 5.13 | 0.94 | 2.63  | 14.75 | 15.64 | 18.25 | 3.01  | Up   | 4.20E-03 |
| CerG2GNAc1(d20:0)    | 870.5 | 9.39  | 15.36 | 7.55 | 0.94 | 2.63  | 14.75 | 22.73 | 18.25 | 1.64  | Up   | 5.14E-02 |
| CerG2GNAc1(d20:0+pO) | 886.5 | 13.52 | 20.68 | 7.41 | 2.77 | 2.63  | 15.11 | 19.74 | 23.17 | 1.53  | Up   | 3.40E-03 |
| CerG2GNAc1(d22:1)    | 896.5 | 4.35  | 15.36 | 4.23 | 0.94 | 2.63  | 14.75 | 16.72 | 18.25 | 3.53  | Up   | 6.00E-04 |
| CerG2GNAc1(d23:0)    | 912.5 | 4.13  | 16.40 | 3.52 | 2.46 | 2.63  | 14.75 | 14.27 | 21.51 | 3.97  | Up   | 1.00E-04 |
| CerG2GNAc1(d23:1)    | 910.5 | 15.49 | 21.08 | 8.91 | 6.77 | 2.63  | 15.00 | 28.65 | 30.62 | 1.36  | Up   | 3.40E-01 |
| CerG2GNAc1(d23:1+hO) | 926.5 | 9.08  | 20.52 | 8.19 | 3.50 | 2.63  | 15.07 | 21.76 | 24.61 | 2.26  | Up   | 1.40E-03 |
| CerG2GNAc1(d24:1)    | 924.5 | 13.76 | 15.36 | 5.98 | 0.94 | 2.63  | 14.75 | 19.52 | 18.25 | 1.12  | Up   | 6.95E-01 |
| CerG2GNAc1(d25:0)    | 940.6 | 5.00  | 15.36 | 4.20 | 0.94 | 2.63  | 14.75 | 13.82 | 18.25 | 3.08  | Up   | 1.00E-04 |
| CerG2GNAc1(d25:0+pO) | 956.6 | 6.84  | 15.36 | 6.30 | 0.94 | 2.63  | 14.75 | 17.60 | 18.25 | 2.25  | Up   | 6.90E-03 |
| CerG2GNAc1(d25:1)    | 938.6 | 4.15  | 15.36 | 3.60 | 0.94 | 2.63  | 14.75 | 14.53 | 18.25 | 3.7   | Up   | 1.00E-04 |
| CerG2GNAc1(d26:0)    | 954.6 | 22.30 | 26.42 | 2.03 | 2.58 | 18.34 | 22.63 | 24.19 | 32.62 | 1.18  | Up   | 2.00E-04 |
| CerG2GNAc1(d26:1+hO) | 968.6 | 20.20 | 23.81 | 8.01 | 4.96 | 5.89  | 15.11 | 29.71 | 31.30 | 1.18  | Up   | 2.03E-01 |

|                         |       |       |       |      |      |       |       |       |       |       |      |          |
|-------------------------|-------|-------|-------|------|------|-------|-------|-------|-------|-------|------|----------|
| CerG2GNAc1(d26:2)       | 950.6 | 6.37  | 15.36 | 6.13 | 0.94 | 2.63  | 14.75 | 17.51 | 18.25 | 2.41  | Up   | 6.60E-03 |
| CerG2GNAc1(d27:0)       | 968.6 | 4.38  | 15.36 | 4.31 | 0.94 | 2.63  | 14.75 | 16.99 | 18.25 | 3.51  | Up   | 6.00E-04 |
| CerG2GNAc1(d27:1)       | 966.6 | 6.69  | 15.36 | 6.01 | 0.94 | 2.63  | 14.75 | 16.70 | 18.25 | 2.3   | Up   | 2.34E-02 |
| CerG2GNAc1(d28:0)       | 982.6 | 10.31 | 15.36 | 6.19 | 0.94 | 2.63  | 14.75 | 19.20 | 18.25 | 1.49  | Up   | 5.23E-02 |
| CerG2GNAc1(d28:0+2O)    | 1015  | 4.93  | 15.36 | 4.10 | 0.94 | 2.63  | 14.75 | 14.15 | 18.25 | 3.11  | Up   | 1.00E-04 |
| CerG2GNAc1(d28:2)       | 978.6 | 6.41  | 15.36 | 4.45 | 0.94 | 2.63  | 14.75 | 13.40 | 18.25 | 2.4   | Up   | 1.00E-04 |
| CerG2GNAc1(d29:1+hO)    | 1011  | 6.61  | 15.36 | 5.91 | 0.94 | 2.63  | 14.75 | 16.94 | 18.25 | 2.32  | Up   | 6.90E-03 |
| CerG2GNAc1(d29:2+hO)    | 1009  | 23.18 | 22.56 | 3.84 | 4.41 | 17.22 | 15.15 | 29.71 | 29.38 | -1.03 | Down | 7.23E-01 |
| CerG2GNAc1(d30:2+pO+2O) | 1055  | 17.40 | 20.02 | 6.25 | 5.48 | 4.21  | 15.00 | 25.43 | 27.99 | 1.15  | Up   | 2.12E-01 |
| CerG2GNAc1(d30:4+pO)    | 1019  | 15.24 | 20.45 | 6.98 | 6.00 | 2.63  | 15.00 | 22.43 | 29.08 | 1.34  | Up   | 1.17E-01 |
| CerG2GNAc1(d31:1+pO+2O) | 1071  | 20.44 | 20.63 | 3.02 | 5.42 | 16.35 | 15.00 | 25.51 | 28.40 | 1.01  | Up   | 1.00E+00 |
| CerG2GNAc1(d32:1+pO+2O) | 1085  | 17.97 | 23.49 | 6.97 | 3.54 | 2.63  | 15.11 | 28.47 | 27.84 | 1.31  | Up   | 3.28E-02 |
| CerG2GNAc1(d32:5)       | 1029  | 17.10 | 21.29 | 9.26 | 5.26 | 2.63  | 15.07 | 27.43 | 28.77 | 1.24  | Up   | 3.72E-01 |
| CerG2GNAc1(d34:0+pO)    | 1083  | 4.26  | 15.36 | 3.95 | 0.94 | 2.63  | 14.75 | 15.75 | 18.25 | 3.6   | Up   | 6.00E-04 |
| CerG2GNAc1(d34:2+2O)    | 1095  | 18.61 | 15.36 | 4.28 | 0.94 | 14.85 | 14.75 | 25.86 | 18.25 | -1.21 | Down | 2.46E-02 |
| CerG2GNAc1(d34:5+hO)    | 1073  | 8.16  | 15.36 | 6.80 | 0.94 | 2.63  | 14.75 | 17.42 | 18.25 | 1.88  | Up   | 1.84E-01 |
| CerG2GNAc1(d35:0+pO)    | 1097  | 5.19  | 15.36 | 4.15 | 0.94 | 2.63  | 14.75 | 15.24 | 18.25 | 2.96  | Up   | 5.00E-04 |
| CerG2GNAc1(d35:2+2O)    | 1109  | 6.20  | 15.36 | 5.73 | 0.94 | 2.63  | 14.75 | 18.88 | 18.25 | 2.48  | Up   | 5.70E-03 |
| CerG2GNAc1(d35:3+2O)    | 1107  | 11.50 | 15.36 | 6.74 | 0.94 | 2.63  | 14.75 | 19.41 | 18.25 | 1.34  | Up   | 3.40E-01 |
| CerG2GNAc1(d36:0+pO)    | 1111  | 8.14  | 15.36 | 6.42 | 0.94 | 2.63  | 14.75 | 17.56 | 18.25 | 1.89  | Up   | 1.03E-02 |
| CerG2GNAc1(d38:3)       | 1117  | 7.12  | 15.36 | 5.37 | 0.94 | 2.63  | 14.75 | 14.27 | 18.25 | 2.16  | Up   | 1.00E-04 |
| CerG2GNAc1(d38:5+pO)    | 1129  | 10.32 | 15.36 | 7.16 | 0.94 | 2.63  | 14.75 | 19.18 | 18.25 | 1.49  | Up   | 5.58E-01 |
| CerG2GNAc1(d41:0)       | 1165  | 15.47 | 23.53 | 8.77 | 5.61 | 2.63  | 14.97 | 26.54 | 31.58 | 1.52  | Up   | 1.50E-02 |
| CerG2GNAc1(d41:0+pO+2O) | 1213  | 11.16 | 15.36 | 6.57 | 0.94 | 2.63  | 14.75 | 17.85 | 18.25 | 1.38  | Up   | 1.85E-01 |
| CerG2GNAc1(d41:2+pO)    | 1177  | 12.80 | 24.04 | 9.25 | 2.36 | 2.63  | 21.32 | 25.63 | 28.54 | 1.88  | Up   | 2.30E-03 |
| CerG2GNAc1(d41:3+pO)    | 1175  | 10.30 | 15.36 | 8.13 | 0.94 | 2.63  | 14.75 | 22.17 | 18.25 | 1.49  | Up   | 5.37E-01 |
| CerG2GNAc1(d47:4)       | 1241  | 8.50  | 15.36 | 6.32 | 0.94 | 2.63  | 14.75 | 19.50 | 18.25 | 1.81  | Up   | 6.00E-03 |
| CerG2GNAc1(d48:5+pO)    | 1269  | 15.89 | 15.36 | 7.59 | 0.94 | 2.63  | 14.75 | 24.91 | 18.25 | -1.03 | Down | 3.10E-01 |
| CerG2GNAc1(d48:6)       | 1251  | 15.26 | 15.36 | 8.22 | 0.94 | 2.63  | 14.75 | 24.80 | 18.25 | 1.01  | Up   | 3.72E-01 |
| CerG2GNAc1(d51:7+hO)    | 1307  | 14.26 | 15.36 | 7.58 | 0.94 | 2.63  | 14.75 | 23.10 | 18.25 | 1.08  | Up   | 1.86E-01 |
| CerG2GNAc1(d55:0)       | 1361  | 7.91  | 15.36 | 6.61 | 0.94 | 2.63  | 14.75 | 18.36 | 18.25 | 1.94  | Up   | 5.14E-02 |
| CerG2GNAc1(d59:0EO)     | 1447  | 11.37 | 20.97 | 9.59 | 3.91 | 2.63  | 14.95 | 25.35 | 26.65 | 1.84  | Up   | 2.85E-02 |
| CerG2GNAc1(d61:3)       | 1439  | 25.95 | 25.70 | 0.82 | 4.18 | 24.28 | 15.59 | 27.10 | 28.47 | -1.01 | Down | 1.06E-02 |
| CerG2GNAc1(d63:0EO)     | 1503  | 29.64 | 29.83 | 1.11 | 4.11 | 28.50 | 18.25 | 31.51 | 32.83 | 1.01  | Up   | 6.04E-02 |
| CerG2GNAc1(d63:2)       | 1469  | 4.24  | 21.02 | 3.88 | 3.86 | 2.63  | 14.95 | 15.52 | 25.84 | 4.96  | Up   | 1.00E-04 |
| CerG2GNAc1(d63:2+pO)    | 1485  | 23.26 | 15.36 | 3.00 | 0.94 | 18.30 | 14.75 | 28.69 | 18.25 | -1.51 | Down | 1.00E-04 |
| CerG2GNAc1(d63:2EO)     | 1499  | 23.94 | 23.46 | 1.27 | 3.63 | 21.68 | 15.58 | 26.43 | 28.54 | -1.02 | Down | 6.73E-01 |
| CerG2GNAc1(d63:5)       | 1463  | 19.86 | 22.89 | 6.64 | 3.34 | 2.63  | 15.58 | 24.10 | 27.85 | 1.15  | Up   | 3.16E-01 |

|                        |       |       |       |       |      |       |       |       |       |       |      |          |
|------------------------|-------|-------|-------|-------|------|-------|-------|-------|-------|-------|------|----------|
| CerG2GNAc1(d64:3)      | 1481  | 6.63  | 15.36 | 6.58  | 0.94 | 2.63  | 14.75 | 18.06 | 18.25 | 2.32  | Up   | 1.49E-02 |
| CerG2GNAc1(d64:3+hOEO) | 1527  | 18.29 | 22.23 | 10.26 | 3.76 | 2.63  | 15.58 | 25.67 | 26.29 | 1.22  | Up   | 9.75E-01 |
| CerG2GNAc1(d64:3+pO)   | 1497  | 27.43 | 28.06 | 0.98  | 3.47 | 24.82 | 18.25 | 28.90 | 30.74 | 1.02  | Up   | 1.06E-02 |
| CerG2GNAc1(d64:4)      | 1479  | 27.43 | 28.01 | 0.96  | 3.44 | 24.79 | 18.25 | 28.42 | 30.30 | 1.02  | Up   | 3.37E-02 |
| CerG2GNAc1(d64:5)      | 1477  | 16.38 | 15.36 | 10.91 | 0.94 | 2.63  | 14.75 | 24.69 | 18.25 | -1.07 | Down | 2.80E-01 |
| CerG2GNAc1(d64:5+pO)   | 1493  | 14.73 | 24.50 | 9.67  | 2.48 | 2.63  | 18.25 | 23.74 | 27.71 | 1.66  | Up   | 8.00E-04 |
| CerG2GNAc1(d64:6)      | 1475  | 16.26 | 24.28 | 10.82 | 2.34 | 2.63  | 18.25 | 24.86 | 27.66 | 1.49  | Up   | 2.85E-02 |
| CerG2GNAc1(d64:6+pO)   | 1491  | 24.10 | 22.80 | 1.71  | 4.05 | 19.98 | 15.58 | 26.25 | 26.62 | -1.06 | Down | 8.33E-01 |
| CerG2GNAc1(d65:0)      | 1501  | 19.84 | 15.86 | 5.99  | 1.78 | 2.63  | 14.86 | 23.58 | 20.70 | -1.25 | Down | 1.30E-03 |
| CerG2GNAc1(d65:3)      | 1495  | 15.76 | 24.20 | 10.42 | 2.18 | 2.63  | 18.25 | 23.80 | 26.18 | 1.53  | Up   | 6.60E-03 |
| CerG2GNAc1(d65:3+pO)   | 1511  | 16.40 | 15.36 | 9.70  | 0.94 | 2.63  | 14.75 | 27.97 | 18.25 | -1.07 | Down | 1.48E-01 |
| CerG2GNAc1(d65:3EO)    | 1525  | 13.79 | 15.36 | 8.45  | 0.94 | 2.63  | 14.75 | 25.61 | 18.25 | 1.11  | Up   | 7.82E-01 |
| CerG2GNAc1(d65:5)      | 1491  | 26.50 | 26.41 | 1.36  | 3.34 | 22.69 | 18.25 | 28.01 | 29.80 | -1    | Down | 2.88E-01 |
| CerG2GNAc1(d65:6)      | 1489  | 23.87 | 23.55 | 1.62  | 3.37 | 19.38 | 15.59 | 25.15 | 26.89 | -1.01 | Down | 7.58E-01 |
| CerG2GNAc1(d66:3EO)    | 1539  | 9.70  | 20.32 | 8.97  | 4.09 | 2.63  | 14.95 | 23.04 | 24.98 | 2.09  | Up   | 8.60E-03 |
| CerG2GNAc1(d67:0EO)    | 1559  | 27.60 | 25.95 | 1.70  | 4.61 | 22.99 | 15.59 | 29.52 | 30.51 | -1.06 | Down | 6.08E-01 |
| CerG2GNAc1(d67:2EO)    | 1555  | 30.27 | 29.88 | 0.99  | 4.14 | 28.16 | 18.25 | 31.87 | 32.97 | -1.01 | Down | 2.07E-01 |
| CerG2GNAc1(d67:3EO)    | 1553  | 16.64 | 23.50 | 9.65  | 3.50 | 2.63  | 15.59 | 27.61 | 27.95 | 1.41  | Up   | 4.52E-02 |
| CerG2GNAc1(d67:4EO)    | 1551  | 24.36 | 24.30 | 1.41  | 3.81 | 22.29 | 15.59 | 26.84 | 28.25 | -1    | Down | 2.88E-01 |
| CerG2GNAc1(d68:0EO)    | 1573  | 24.56 | 23.68 | 1.39  | 4.54 | 21.14 | 15.58 | 25.95 | 27.68 | -1.04 | Down | 2.60E-01 |
| CerG2GNAc1(d68:2EO)    | 1569  | 17.97 | 24.24 | 10.34 | 2.32 | 2.63  | 18.25 | 25.36 | 26.71 | 1.35  | Up   | 4.06E-01 |
| CerG2GNAc1(d69:1+pOEO) | 1601  | 7.05  | 15.36 | 5.76  | 0.94 | 2.63  | 14.75 | 18.45 | 18.25 | 2.18  | Up   | 9.00E-04 |
| CerG2GNAc1(d69:3EO)    | 1581  | 17.49 | 15.36 | 8.53  | 0.94 | 2.63  | 14.75 | 27.88 | 18.25 | -1.14 | Down | 3.17E-02 |
| CerG2GNAc1(d69:4EO)    | 1579  | 18.24 | 15.36 | 8.31  | 0.94 | 2.63  | 14.75 | 27.22 | 18.25 | -1.19 | Down | 1.29E-02 |
| CerG2GNAc1(d71:1EO)    | 1613  | 16.78 | 15.36 | 9.82  | 0.94 | 2.63  | 14.75 | 24.14 | 18.25 | -1.09 | Down | 2.81E-01 |
| CerG2GNAc1(d71:2EO)    | 1611  | 27.50 | 26.70 | 1.10  | 4.00 | 24.54 | 15.59 | 28.63 | 30.63 | -1.03 | Down | 1.00E+00 |
| CerG2GNAc1(d71:4EO)    | 1607  | 25.15 | 25.29 | 1.53  | 3.31 | 21.53 | 15.59 | 27.79 | 28.30 | 1.01  | Up   | 2.42E-01 |
| CerG2GNAc1(d72:2EO)    | 1625  | 18.15 | 15.36 | 8.22  | 0.94 | 2.63  | 14.75 | 23.36 | 18.25 | -1.18 | Down | 2.09E-02 |
| CerG2GNAc1(d73:0EO)    | 1643  | 11.21 | 15.36 | 11.05 | 0.94 | 2.63  | 14.75 | 26.22 | 18.25 | 1.37  | Up   | 2.79E-01 |
| CerG2GNAc1(d78:0EO)    | 1713  | 19.05 | 15.36 | 8.73  | 0.94 | 2.63  | 14.75 | 24.97 | 18.25 | -1.24 | Down | 1.50E-02 |
| CerG2GNAc1(d78:2EO)    | 1709  | 4.65  | 15.36 | 5.20  | 0.94 | 2.63  | 14.75 | 20.01 | 18.25 | 3.3   | Up   | 8.00E-04 |
| CerG2GNAc1(d80:1EO)    | 1739  | 8.66  | 19.64 | 7.63  | 3.45 | 2.63  | 14.95 | 20.44 | 23.13 | 2.27  | Up   | 1.40E-03 |
| CerG2GNAc1(d84:0EO)    | 1797  | 12.96 | 27.68 | 11.21 | 1.84 | 2.63  | 25.36 | 27.06 | 32.48 | 2.14  | Up   | 3.00E-04 |
| CerG2GNAc1(d84:1EO)    | 1795  | 10.73 | 15.36 | 10.36 | 0.94 | 2.63  | 14.75 | 25.15 | 18.25 | 1.43  | Up   | 2.79E-01 |
| CerG2GNAc1(d85:0EO)    | 1811  | 14.99 | 27.97 | 9.76  | 2.25 | 2.63  | 25.58 | 26.28 | 33.80 | 1.87  | Up   | 1.00E-04 |
| CerG2GNAc1(d85:1EO)    | 1809  | 16.92 | 18.86 | 7.10  | 4.09 | 2.63  | 14.86 | 20.95 | 23.74 | 1.11  | Up   | 8.78E-01 |
| CerG3(d15:0+pO)        | 775.4 | 13.43 | 22.08 | 7.16  | 2.95 | 2.63  | 15.15 | 20.52 | 26.24 | 1.64  | Up   | 4.00E-04 |
| CerG3(d18:0)           | 801.4 | 4.16  | 15.36 | 4.12  | 0.94 | 2.63  | 14.75 | 16.23 | 18.25 | 3.69  | Up   | 5.00E-04 |

|                    |       |       |       |       |      |       |       |       |       |       |      |          |
|--------------------|-------|-------|-------|-------|------|-------|-------|-------|-------|-------|------|----------|
| CerG3(d18:1/16:0)  | 1024  | 20.30 | 23.75 | 1.09  | 1.89 | 19.04 | 18.25 | 22.38 | 25.61 | 1.17  | Up   | 3.00E-04 |
| CerG3(d18:1/18:0)  | 1052  | 19.61 | 24.64 | 5.99  | 2.23 | 2.63  | 18.25 | 23.30 | 27.33 | 1.26  | Up   | 1.00E-04 |
| CerG3(d21:0+pO)    | 859.5 | 3.90  | 15.36 | 2.82  | 0.94 | 2.63  | 14.75 | 11.82 | 18.25 | 3.93  | Up   | 1.00E-04 |
| CerG3(d21:1+hO)    | 857.5 | 18.81 | 27.14 | 6.40  | 1.52 | 2.63  | 24.16 | 24.58 | 29.46 | 1.44  | Up   | 1.00E-04 |
| CerG3(d22:1)       | 855.5 | 4.18  | 15.36 | 3.67  | 0.94 | 2.63  | 14.75 | 14.80 | 18.25 | 3.68  | Up   | 1.00E-04 |
| CerG3(d24:0)       | 885.5 | 6.39  | 15.36 | 4.43  | 0.94 | 2.63  | 14.75 | 13.29 | 18.25 | 2.4   | Up   | 1.00E-04 |
| CerG3(d25:0)       | 899.5 | 4.08  | 15.36 | 3.37  | 0.94 | 2.63  | 14.75 | 13.76 | 18.25 | 3.76  | Up   | 1.00E-04 |
| CerG3(d25:0+pO)    | 915.5 | 14.28 | 15.36 | 5.99  | 0.94 | 2.63  | 14.75 | 19.72 | 18.25 | 1.08  | Up   | 4.42E-01 |
| CerG3(d25:1)       | 897.5 | 6.70  | 15.36 | 5.46  | 0.94 | 2.63  | 14.75 | 15.14 | 18.25 | 2.29  | Up   | 1.10E-03 |
| CerG3(d26:0+pO)    | 929.6 | 5.23  | 15.36 | 4.52  | 0.94 | 2.63  | 14.75 | 15.83 | 18.25 | 2.94  | Up   | 7.00E-04 |
| CerG3(d26:0+pO+O)  | 945.6 | 18.02 | 25.61 | 1.20  | 1.35 | 16.12 | 23.70 | 19.77 | 28.13 | 1.42  | Up   | 1.00E-04 |
| CerG3(d26:2)       | 909.5 | 10.94 | 21.20 | 10.10 | 4.52 | 2.63  | 15.00 | 28.54 | 29.40 | 1.94  | Up   | 1.22E-02 |
| CerG3(d27:1)       | 925.6 | 10.11 | 17.70 | 7.83  | 3.35 | 2.63  | 14.75 | 19.62 | 23.36 | 1.75  | Up   | 3.87E-02 |
| CerG3(d27:1+pO)    | 941.6 | 3.98  | 15.36 | 3.06  | 0.94 | 2.63  | 14.75 | 12.65 | 18.25 | 3.86  | Up   | 1.00E-04 |
| CerG3(d28:0)       | 941.6 | 11.15 | 15.36 | 5.98  | 0.94 | 2.63  | 14.75 | 16.62 | 18.25 | 1.38  | Up   | 5.59E-01 |
| CerG3(d28:0+2O)    | 973.6 | 19.64 | 15.36 | 8.49  | 0.94 | 2.63  | 14.75 | 29.24 | 18.25 | -1.28 | Down | 1.06E-02 |
| CerG3(d28:1+hO)    | 955.6 | 5.03  | 15.36 | 4.26  | 0.94 | 2.63  | 14.75 | 13.68 | 18.25 | 3.06  | Up   | 1.00E-04 |
| CerG3(d29:0)       | 955.6 | 14.68 | 15.36 | 8.15  | 0.94 | 2.63  | 14.75 | 26.18 | 18.25 | 1.05  | Up   | 1.66E-01 |
| CerG3(d29:0+2O)    | 987.6 | 12.01 | 15.36 | 9.20  | 0.94 | 2.63  | 14.75 | 27.11 | 18.25 | 1.28  | Up   | 1.66E-01 |
| CerG3(d29:0+pO)    | 971.6 | 25.21 | 28.22 | 0.96  | 2.73 | 23.64 | 25.30 | 27.49 | 34.76 | 1.12  | Up   | 3.00E-03 |
| CerG3(d29:1)       | 953.6 | 24.38 | 28.19 | 0.93  | 2.68 | 23.16 | 25.38 | 26.87 | 34.63 | 1.16  | Up   | 1.00E-04 |
| CerG3(d29:1+hO)    | 969.6 | 5.55  | 15.36 | 5.43  | 0.94 | 2.63  | 14.75 | 17.53 | 18.25 | 2.77  | Up   | 2.00E-03 |
| CerG3(d30:0)       | 969.6 | 15.29 | 15.36 | 7.47  | 0.94 | 2.63  | 14.75 | 26.62 | 18.25 | 1     | Up   | 1.03E-01 |
| CerG3(d30:1)       | 967.6 | 11.44 | 17.05 | 7.65  | 3.66 | 2.63  | 14.75 | 19.83 | 25.67 | 1.49  | Up   | 4.78E-01 |
| CerG3(d30:3)       | 963.6 | 21.32 | 21.07 | 6.92  | 6.76 | 5.89  | 15.00 | 29.76 | 30.62 | -1.01 | Down | 8.80E-01 |
| CerG3(d30:3+pO)    | 979.6 | 20.34 | 20.79 | 2.08  | 2.91 | 18.30 | 15.15 | 25.00 | 24.51 | 1.02  | Up   | 3.40E-01 |
| CerG3(d30:4)       | 961.6 | 6.37  | 15.36 | 5.58  | 0.94 | 2.63  | 14.75 | 16.97 | 18.25 | 2.41  | Up   | 3.90E-03 |
| CerG3(d31:0)       | 983.6 | 9.49  | 15.36 | 9.36  | 0.94 | 2.63  | 14.75 | 27.37 | 18.25 | 1.62  | Up   | 1.12E-02 |
| CerG3(d31:0+O)     | 999.6 | 7.67  | 15.36 | 5.81  | 0.94 | 2.63  | 14.75 | 18.98 | 18.25 | 2     | Up   | 1.00E-03 |
| CerG3(d31:1+pO+2O) | 1030  | 6.70  | 15.36 | 6.04  | 0.94 | 2.63  | 14.75 | 17.20 | 18.25 | 2.29  | Up   | 2.34E-02 |
| CerG3(d31:3)       | 977.6 | 18.26 | 15.36 | 2.42  | 0.94 | 15.13 | 14.75 | 22.30 | 18.25 | -1.19 | Down | 2.00E-04 |
| CerG3(d32:0)       | 997.7 | 8.22  | 15.36 | 8.76  | 0.94 | 2.63  | 14.75 | 23.90 | 18.25 | 1.87  | Up   | 5.83E-02 |
| CerG3(d33:1)       | 1010  | 14.35 | 15.36 | 10.29 | 0.94 | 2.63  | 14.75 | 29.52 | 18.25 | 1.07  | Up   | 5.17E-01 |
| CerG3(d34:3+hO+2O) | 1068  | 9.69  | 15.36 | 6.06  | 0.94 | 2.63  | 14.75 | 17.53 | 18.25 | 1.58  | Up   | 3.62E-02 |
| CerG3(d35:5+pO)    | 1046  | 7.12  | 22.43 | 5.39  | 5.00 | 2.63  | 15.00 | 14.97 | 27.93 | 3.15  | Up   | 1.00E-04 |
| CerG3(d37:4+pO)    | 1076  | 25.08 | 28.09 | 0.96  | 2.61 | 23.74 | 24.86 | 27.01 | 34.17 | 1.12  | Up   | 2.20E-03 |
| CerG3(d37:5)       | 1058  | 24.98 | 28.09 | 0.92  | 2.65 | 23.78 | 24.86 | 26.81 | 34.30 | 1.12  | Up   | 1.90E-03 |
| CerG3(d37:6+hO)    | 1072  | 18.40 | 15.36 | 4.91  | 0.94 | 5.89  | 14.75 | 23.93 | 18.25 | -1.2  | Down | 1.30E-03 |

|                      |       |       |       |       |      |       |       |       |       |       |      |          |
|----------------------|-------|-------|-------|-------|------|-------|-------|-------|-------|-------|------|----------|
| CerG3(d38:1+hO+O)    | 1112  | 7.54  | 15.36 | 6.35  | 0.94 | 2.63  | 14.75 | 20.78 | 18.25 | 2.04  | Up   | 9.00E-04 |
| CerG3(d38:1+pO+2O)   | 1128  | 6.10  | 15.36 | 5.27  | 0.94 | 2.63  | 14.75 | 17.39 | 18.25 | 2.52  | Up   | 7.00E-04 |
| CerG3(d38:5+pO)      | 1088  | 6.78  | 15.36 | 6.20  | 0.94 | 2.63  | 14.75 | 17.87 | 18.25 | 2.26  | Up   | 8.30E-03 |
| CerG3(d39:0+pO)      | 1112  | 8.15  | 15.36 | 5.89  | 0.94 | 2.63  | 14.75 | 15.48 | 18.25 | 1.88  | Up   | 6.00E-04 |
| CerG3(d39:2)         | 1092  | 7.51  | 15.36 | 5.90  | 0.94 | 2.63  | 14.75 | 15.73 | 18.25 | 2.05  | Up   | 8.00E-04 |
| CerG3(d41:5+pO)      | 1130  | 6.03  | 15.36 | 5.02  | 0.94 | 2.63  | 14.75 | 16.10 | 18.25 | 2.55  | Up   | 7.00E-04 |
| CerG3(d44:1)         | 1164  | 16.22 | 23.09 | 5.83  | 2.34 | 2.63  | 21.08 | 23.88 | 29.16 | 1.42  | Up   | 1.70E-03 |
| CerG3(d56:1)         | 1332  | 5.13  | 15.36 | 5.26  | 0.94 | 2.63  | 14.75 | 17.46 | 18.25 | 2.99  | Up   | 6.00E-04 |
| CerG3(d58:3+hO)      | 1372  | 6.44  | 15.36 | 5.61  | 0.94 | 2.63  | 14.75 | 16.39 | 18.25 | 2.39  | Up   | 7.00E-04 |
| CerG3(d58:8)         | 1346  | 14.02 | 15.36 | 9.50  | 0.94 | 2.63  | 14.75 | 27.74 | 18.25 | 1.1   | Up   | 3.55E-01 |
| CerG3(d59:0)         | 1376  | 6.25  | 15.36 | 5.97  | 0.94 | 2.63  | 14.75 | 17.66 | 18.25 | 2.46  | Up   | 4.50E-03 |
| CerG3(d60:3+hOEO)    | 1430  | 8.61  | 15.36 | 7.62  | 0.94 | 2.63  | 14.75 | 22.65 | 18.25 | 1.78  | Up   | 1.64E-01 |
| CerG3(d61:0+pO)      | 1420  | 11.43 | 15.36 | 11.40 | 0.94 | 2.63  | 14.75 | 27.81 | 18.25 | 1.34  | Up   | 2.79E-01 |
| CerG3(d61:5)         | 1394  | 9.85  | 20.98 | 9.34  | 3.92 | 2.63  | 14.95 | 24.93 | 26.49 | 2.13  | Up   | 1.46E-02 |
| CerG3(d62:0)         | 1418  | 5.41  | 15.36 | 5.10  | 0.94 | 2.63  | 14.75 | 16.10 | 18.25 | 2.84  | Up   | 1.00E-03 |
| CerG3(d62:1+pOEO)    | 1462  | 25.19 | 25.12 | 1.22  | 2.58 | 21.82 | 18.25 | 26.88 | 27.68 | -1    | Down | 6.89E-01 |
| CerG3(d63:0EO)       | 1462  | 20.63 | 27.11 | 10.38 | 3.12 | 2.63  | 18.25 | 28.71 | 29.52 | 1.31  | Up   | 1.78E-02 |
| CerG3(d64:0+pO)      | 1462  | 9.23  | 15.36 | 8.30  | 0.94 | 2.63  | 14.75 | 20.95 | 18.25 | 1.66  | Up   | 2.53E-01 |
| CerG3(d64:0+pOEO)    | 1492  | 10.52 | 15.36 | 10.19 | 0.94 | 2.63  | 14.75 | 26.39 | 18.25 | 1.46  | Up   | 2.79E-01 |
| CerG3(d64:0EO)       | 1476  | 15.74 | 15.36 | 9.09  | 0.94 | 2.63  | 14.75 | 27.77 | 18.25 | -1.02 | Down | 1.66E-01 |
| CerG3(d65:1EO)       | 1488  | 16.84 | 15.36 | 8.28  | 0.94 | 2.63  | 14.75 | 27.01 | 18.25 | -1.1  | Down | 3.37E-02 |
| CerG3(d65:2+pOEO)    | 1502  | 4.31  | 15.36 | 4.11  | 0.94 | 2.63  | 14.75 | 16.30 | 18.25 | 3.56  | Up   | 6.00E-04 |
| CerG3(d65:5)         | 1450  | 25.62 | 25.44 | 1.42  | 4.20 | 23.78 | 15.59 | 28.25 | 29.12 | -1.01 | Down | 2.12E-01 |
| CerG3(d66:0+pOEO)    | 1520  | 30.56 | 29.92 | 0.82  | 4.12 | 29.64 | 18.25 | 31.78 | 32.62 | -1.02 | Down | 1.85E-01 |
| CerG3(d66:1+pOEO)    | 1518  | 20.42 | 15.36 | 3.06  | 0.94 | 17.36 | 14.75 | 25.58 | 18.25 | -1.33 | Down | 1.00E-04 |
| CerG3(d66:2+pOEO)    | 1516  | 24.78 | 24.60 | 1.13  | 3.89 | 22.25 | 15.59 | 26.47 | 28.85 | -1.01 | Down | 1.66E-01 |
| CerG3(d67:1EO)       | 1516  | 13.18 | 15.36 | 6.97  | 0.94 | 2.63  | 14.75 | 20.84 | 18.25 | 1.17  | Up   | 8.29E-01 |
| CerG3(d67:2EO)       | 1514  | 18.87 | 25.15 | 9.39  | 2.81 | 2.63  | 18.25 | 25.88 | 27.95 | 1.33  | Up   | 2.66E-02 |
| CerG3(d68:0EO)       | 1532  | 8.23  | 15.36 | 8.64  | 0.94 | 2.63  | 14.75 | 22.52 | 18.25 | 1.87  | Up   | 6.70E-02 |
| CerG3(d68:2+pOEO)    | 1544  | 16.12 | 15.36 | 9.16  | 0.94 | 2.63  | 14.75 | 26.16 | 18.25 | -1.05 | Down | 1.31E-01 |
| CerG3(d69:1+pOEO)    | 1560  | 16.81 | 15.36 | 9.55  | 0.94 | 2.63  | 14.75 | 24.23 | 18.25 | -1.09 | Down | 2.81E-01 |
| CerG3(d70:0+pOEO)    | 1576  | 27.87 | 26.59 | 1.35  | 4.90 | 24.40 | 15.59 | 29.32 | 30.54 | -1.05 | Down | 7.40E-01 |
| CerG3(d70:2EO)       | 1556  | 4.14  | 15.36 | 3.56  | 0.94 | 2.63  | 14.75 | 14.42 | 18.25 | 3.71  | Up   | 1.00E-04 |
| CerG3(d71:0+pOEO)    | 1590  | 24.38 | 15.36 | 1.95  | 0.94 | 20.45 | 14.75 | 26.53 | 18.25 | -1.59 | Down | 1.00E-04 |
| CerG3(d73:1EO)       | 1600  | 10.32 | 15.36 | 9.78  | 0.94 | 2.63  | 14.75 | 23.59 | 18.25 | 1.49  | Up   | 2.79E-01 |
| CerG3(d75:2EO)       | 1626  | 17.12 | 22.59 | 11.49 | 3.98 | 2.63  | 15.58 | 25.94 | 26.56 | 1.32  | Up   | 6.88E-01 |
| CerG3GNAc1(d14:0)    | 948.5 | 5.46  | 15.36 | 5.24  | 0.94 | 2.63  | 14.75 | 17.24 | 18.25 | 2.82  | Up   | 7.00E-04 |
| CerG3GNAc1(d15:0+pO) | 978.5 | 5.20  | 15.36 | 4.75  | 0.94 | 2.63  | 14.75 | 16.60 | 18.25 | 2.95  | Up   | 7.00E-04 |



|                        |      |       |       |      |      |       |       |       |       |       |      |          |
|------------------------|------|-------|-------|------|------|-------|-------|-------|-------|-------|------|----------|
| CerG3GNAc1(d18:0+pO)   | 1021 | 7.25  | 15.36 | 6.61 | 0.94 | 2.63  | 14.75 | 19.60 | 18.25 | 2.12  | Up   | 1.00E-03 |
| CerG3GNAc1(d20:0)      | 1033 | 6.89  | 15.36 | 4.32 | 0.94 | 2.63  | 14.75 | 13.40 | 18.25 | 2.23  | Up   | 1.00E-04 |
| CerG3GNAc1(d20:1)      | 1031 | 5.35  | 15.36 | 4.97 | 0.94 | 2.63  | 14.75 | 15.27 | 18.25 | 2.87  | Up   | 2.00E-03 |
| CerG3GNAc1(d21:1)      | 1045 | 5.86  | 15.36 | 5.90 | 0.94 | 2.63  | 14.75 | 19.47 | 18.25 | 2.62  | Up   | 3.70E-03 |
| CerG3GNAc1(d22:1)      | 1059 | 6.67  | 15.36 | 5.71 | 0.94 | 2.63  | 14.75 | 15.72 | 18.25 | 2.3   | Up   | 5.70E-03 |
| CerG3GNAc1(d34:1)      | 1227 | 19.63 | 23.31 | 1.61 | 1.80 | 16.17 | 18.25 | 22.30 | 25.28 | 1.19  | Up   | 6.00E-04 |
| CerG3GNAc1(d35:4)      | 1235 | 10.50 | 19.17 | 9.02 | 4.44 | 2.63  | 15.00 | 22.85 | 25.61 | 1.82  | Up   | 3.29E-02 |
| CerG3GNAc1(d36:1)      | 1255 | 20.36 | 23.62 | 1.46 | 1.94 | 18.59 | 18.25 | 23.16 | 25.72 | 1.16  | Up   | 1.20E-03 |
| CerG3GNAc1(d38:4)      | 1277 | 9.88  | 21.35 | 7.74 | 2.16 | 2.63  | 15.59 | 21.20 | 25.12 | 2.16  | Up   | 3.00E-04 |
| CerG3GNAc1(d39:2)      | 1295 | 9.27  | 16.01 | 7.23 | 2.27 | 2.63  | 14.75 | 18.95 | 22.60 | 1.73  | Up   | 1.46E-01 |
| CerG3GNAc1(d43:3)      | 1349 | 6.21  | 15.36 | 5.21 | 0.94 | 2.63  | 14.75 | 14.68 | 18.25 | 2.47  | Up   | 1.00E-04 |
| CerG3GNAc1(d45:3+pO)   | 1393 | 5.06  | 15.36 | 4.44 | 0.94 | 2.63  | 14.75 | 15.78 | 18.25 | 3.04  | Up   | 7.00E-04 |
| CerG3GNAc1(d45:6)      | 1371 | 8.87  | 15.36 | 8.04 | 0.94 | 2.63  | 14.75 | 24.17 | 18.25 | 1.73  | Up   | 2.05E-01 |
| CerG3GNAc1(d46:5)      | 1387 | 10.11 | 22.86 | 8.16 | 4.30 | 2.63  | 15.11 | 24.73 | 31.42 | 2.26  | Up   | 2.80E-03 |
| CerG3GNAc1(d47:6)      | 1399 | 8.37  | 15.36 | 6.46 | 0.94 | 2.63  | 14.75 | 18.24 | 18.25 | 1.83  | Up   | 1.03E-02 |
| CerG3GNAc1(d49:2)      | 1435 | 6.17  | 15.36 | 5.48 | 0.94 | 2.63  | 14.75 | 15.31 | 18.25 | 2.49  | Up   | 7.00E-04 |
| CerG3GNAc1(d50:1+O)    | 1467 | 15.14 | 15.36 | 9.93 | 0.94 | 2.63  | 14.75 | 22.73 | 18.25 | 1.01  | Up   | 2.80E-01 |
| CerG3GNAc1(d50:7+hO)   | 1455 | 11.53 | 15.36 | 9.38 | 0.94 | 2.63  | 14.75 | 22.54 | 18.25 | 1.33  | Up   | 7.34E-01 |
| CerG3GNAc1(d51:0+pO+O) | 1499 | 7.78  | 15.36 | 6.66 | 0.94 | 2.63  | 14.75 | 19.71 | 18.25 | 1.98  | Up   | 1.03E-02 |
| CerG3GNAc1(d53:4)      | 1487 | 10.11 | 15.36 | 8.42 | 0.94 | 2.63  | 14.75 | 20.49 | 18.25 | 1.52  | Up   | 4.04E-01 |
| CerG3GNAc1(d58:1)      | 1563 | 20.72 | 22.67 | 3.11 | 4.14 | 14.85 | 14.97 | 23.43 | 27.58 | 1.09  | Up   | 5.95E-02 |
| CerG3GNAc1(d60:2+pOEO) | 1635 | 4.29  | 15.36 | 4.04 | 0.94 | 2.63  | 14.75 | 16.05 | 18.25 | 3.58  | Up   | 6.00E-04 |
| CerG3GNAc1(d61:5)      | 1597 | 25.04 | 23.50 | 1.39 | 3.56 | 21.46 | 14.95 | 26.58 | 26.76 | -1.07 | Down | 3.72E-01 |
| CerG3GNAc1(d62:0EO)    | 1651 | 6.40  | 15.36 | 5.55 | 0.94 | 2.63  | 14.75 | 16.30 | 18.25 | 2.4   | Up   | 1.10E-03 |
| CerG3GNAc1(d83:0EO)    | 1946 | 11.43 | 25.56 | 8.02 | 4.25 | 2.63  | 15.11 | 20.31 | 32.35 | 2.24  | Up   | 2.00E-04 |
| CerG3GNAc1(d84:0EO)    | 1960 | 10.62 | 24.41 | 6.07 | 3.94 | 2.63  | 15.11 | 18.85 | 31.78 | 2.3   | Up   | 1.00E-04 |
| CerG3GNAc2(d22:1)      | 1262 | 6.42  | 15.36 | 6.18 | 0.94 | 2.63  | 14.75 | 16.86 | 18.25 | 2.39  | Up   | 9.60E-03 |
| CerG3GNAc2(d23:0+pO)   | 1294 | 7.27  | 15.36 | 5.56 | 0.94 | 2.63  | 14.75 | 16.46 | 18.25 | 2.11  | Up   | 1.20E-03 |
| CerG3GNAc2(d38:1+hO+O) | 1518 | 6.48  | 15.36 | 6.14 | 0.94 | 2.63  | 14.75 | 19.03 | 18.25 | 2.37  | Up   | 2.70E-03 |
| CerG3GNAc2(d41:0+pO+O) | 1562 | 6.19  | 15.36 | 5.26 | 0.94 | 2.63  | 14.75 | 15.91 | 18.25 | 2.48  | Up   | 1.10E-03 |
| CerG3GNAc2(d42:4)      | 1536 | 8.05  | 15.36 | 7.07 | 0.94 | 2.63  | 14.75 | 22.50 | 18.25 | 1.91  | Up   | 8.60E-03 |
| CerG3GNAc2(d44:5)      | 1562 | 5.38  | 15.36 | 4.11 | 0.94 | 2.63  | 14.75 | 13.64 | 18.25 | 2.85  | Up   | 1.00E-04 |
| CerG3GNAc2(d44:7)      | 1558 | 7.33  | 15.36 | 6.26 | 0.94 | 2.63  | 14.75 | 16.33 | 18.25 | 2.1   | Up   | 1.30E-02 |
| CerG3GNAc2(d47:2)      | 1610 | 6.22  | 15.36 | 5.53 | 0.94 | 2.63  | 14.75 | 17.39 | 18.25 | 2.47  | Up   | 6.90E-03 |
| CerG3GNAc2(d47:4)      | 1606 | 8.24  | 15.36 | 6.57 | 0.94 | 2.63  | 14.75 | 21.00 | 18.25 | 1.86  | Up   | 1.40E-03 |
| CerG3GNAc2(d50:0)      | 1656 | 4.59  | 15.36 | 5.01 | 0.94 | 2.63  | 14.75 | 19.37 | 18.25 | 3.35  | Up   | 8.00E-04 |
| CerG3GNAc2(d53:0+pO)   | 1714 | 5.50  | 15.36 | 6.56 | 0.94 | 2.63  | 14.75 | 21.77 | 18.25 | 2.79  | Up   | 3.20E-03 |
| CerG3GNAc2(d54:0+pO)   | 1728 | 7.37  | 15.36 | 6.32 | 0.94 | 2.63  | 14.75 | 20.03 | 18.25 | 2.08  | Up   | 8.60E-03 |

|                      |       |       |       |      |      |       |       |       |       |       |      |          |
|----------------------|-------|-------|-------|------|------|-------|-------|-------|-------|-------|------|----------|
| CerG3GNAc2(d59:1+pO) | 1796  | 5.70  | 15.36 | 5.73 | 0.94 | 2.63  | 14.75 | 17.42 | 18.25 | 2.7   | Up   | 6.60E-03 |
| CerG3GNAc2(d59:3+pO) | 1792  | 5.22  | 15.36 | 5.06 | 0.94 | 2.63  | 14.75 | 15.48 | 18.25 | 2.94  | Up   | 1.20E-03 |
| CerG3GNAc2(d62:2)    | 1820  | 4.07  | 15.36 | 3.34 | 0.94 | 2.63  | 14.75 | 13.64 | 18.25 | 3.77  | Up   | 1.00E-04 |
| CerG3GNAc2(d62:5)    | 1814  | 4.55  | 15.36 | 4.89 | 0.94 | 2.63  | 14.75 | 18.95 | 18.25 | 3.37  | Up   | 8.00E-04 |
| CerG3GNAc2(d64:2)    | 1848  | 5.50  | 15.36 | 5.68 | 0.94 | 2.63  | 14.75 | 17.07 | 18.25 | 2.79  | Up   | 6.20E-03 |
| CerP(d14:0+pO)       | 355.2 | 8.45  | 15.36 | 7.22 | 0.94 | 2.63  | 14.75 | 21.84 | 18.25 | 1.82  | Up   | 1.00E-02 |
| CerP(d15:0+pO)       | 369.2 | 18.73 | 19.74 | 2.52 | 3.61 | 15.05 | 14.86 | 22.29 | 23.73 | 1.05  | Up   | 5.66E-01 |
| CerP(d15:0+pO/8:0)   | 481.3 | 25.58 | 15.36 | 0.80 | 0.94 | 24.28 | 14.75 | 27.35 | 18.25 | -1.67 | Down | 1.00E-04 |
| CerP(d18:0+pO/33:2)  | 869.7 | 21.56 | 22.88 | 2.64 | 1.98 | 19.18 | 18.25 | 26.88 | 25.93 | 1.06  | Up   | 1.16E-01 |
| CerP(d18:1/32:2)     | 837.7 | 24.73 | 28.17 | 6.91 | 2.08 | 14.68 | 23.84 | 29.98 | 30.82 | 1.14  | Up   | 6.51E-01 |
| CerP(d18:1/32:3)     | 835.7 | 21.47 | 27.37 | 8.27 | 1.54 | 2.63  | 24.37 | 28.52 | 29.34 | 1.28  | Up   | 2.46E-02 |
| CerP(d18:1/33:2)     | 851.7 | 26.75 | 15.36 | 5.60 | 0.94 | 17.69 | 14.75 | 31.03 | 18.25 | -1.74 | Down | 1.00E-04 |
| CerP(d18:1/46:1EO)   | 1066  | 20.57 | 15.36 | 4.03 | 0.94 | 16.76 | 14.75 | 27.51 | 18.25 | -1.34 | Down | 1.00E-04 |
| CerP(d20:0+pO/27:5)  | 807.6 | 21.74 | 15.36 | 9.10 | 0.94 | 2.63  | 14.75 | 28.63 | 18.25 | -1.42 | Down | 7.92E-02 |
| CerP(d21:0)          | 437.3 | 24.28 | 24.46 | 1.03 | 2.15 | 22.90 | 18.25 | 25.84 | 26.26 | 1.01  | Up   | 2.18E-01 |
| CerP(d23:0)          | 465.3 | 24.61 | 24.46 | 0.87 | 2.11 | 23.69 | 18.25 | 26.74 | 26.02 | -1.01 | Down | 3.72E-01 |
| CerP(d23:1)          | 463.3 | 25.31 | 25.44 | 0.80 | 2.40 | 24.29 | 18.25 | 27.02 | 27.73 | 1.01  | Up   | 6.88E-02 |
| CerP(d29:2+hO)       | 561.4 | 19.85 | 15.36 | 5.33 | 0.94 | 5.89  | 14.75 | 26.91 | 18.25 | -1.29 | Down | 4.00E-04 |
| CerP(d32:0)          | 591.5 | 21.18 | 22.98 | 1.61 | 1.72 | 17.43 | 18.25 | 23.98 | 25.16 | 1.09  | Up   | 5.10E-03 |
| CerP(d33:1)          | 603.5 | 9.22  | 19.52 | 7.86 | 3.51 | 2.63  | 14.95 | 20.11 | 23.53 | 2.12  | Up   | 1.70E-03 |
| CerP(d33:5)          | 595.4 | 21.73 | 23.26 | 1.49 | 2.06 | 19.19 | 18.25 | 24.57 | 25.93 | 1.07  | Up   | 5.69E-02 |
| CerP(d34:2)          | 615.5 | 19.74 | 15.36 | 3.63 | 0.94 | 13.24 | 14.75 | 25.46 | 18.25 | -1.29 | Down | 1.30E-03 |
| CerP(d37:4)          | 653.5 | 16.69 | 20.79 | 7.37 | 3.80 | 2.63  | 15.07 | 25.82 | 26.04 | 1.25  | Up   | 2.07E-01 |
| CerP(d38:6)          | 663.5 | 7.47  | 15.36 | 6.81 | 0.94 | 2.63  | 14.75 | 18.63 | 18.25 | 2.06  | Up   | 3.65E-02 |
| CerP(d39:0)          | 689.6 | 17.79 | 15.36 | 6.51 | 0.94 | 2.63  | 14.75 | 25.44 | 18.25 | -1.16 | Down | 2.81E-01 |
| CerP(d40:0)          | 703.6 | 9.62  | 15.36 | 8.87 | 0.94 | 2.63  | 14.75 | 22.62 | 18.25 | 1.6   | Up   | 2.79E-01 |
| CerP(d40:0+O)        | 719.6 | 16.59 | 15.36 | 2.72 | 0.94 | 12.54 | 14.75 | 19.24 | 18.25 | -1.08 | Down | 3.25E-01 |
| CerP(d40:0+pO+2O)    | 751.6 | 19.99 | 23.70 | 6.03 | 1.98 | 2.63  | 18.25 | 24.41 | 25.75 | 1.19  | Up   | 4.50E-03 |
| CerP(d40:5)          | 693.5 | 19.24 | 15.36 | 2.77 | 0.94 | 14.15 | 14.75 | 21.91 | 18.25 | -1.25 | Down | 8.10E-03 |
| CerP(d41:5)          | 707.5 | 8.23  | 27.25 | 7.18 | 2.91 | 2.63  | 18.25 | 21.06 | 29.71 | 3.31  | Up   | 1.00E-04 |
| CerP(d41:7+hO)       | 719.5 | 4.41  | 18.09 | 4.41 | 3.30 | 2.63  | 14.75 | 17.33 | 22.19 | 4.11  | Up   | 2.00E-04 |
| CerP(d42:0)          | 731.6 | 16.21 | 15.36 | 9.31 | 0.94 | 2.63  | 14.75 | 24.17 | 18.25 | -1.06 | Down | 2.81E-01 |
| CerP(d42:4+pO)       | 739.6 | 17.93 | 15.36 | 3.95 | 0.94 | 11.26 | 14.75 | 22.57 | 18.25 | -1.17 | Down | 1.34E-01 |
| CerP(d42:5)          | 721.5 | 23.52 | 24.71 | 1.24 | 2.10 | 22.50 | 18.25 | 25.89 | 26.27 | 1.05  | Up   | 2.66E-02 |
| CerP(d42:8)          | 715.5 | 28.71 | 23.01 | 1.82 | 1.96 | 25.85 | 21.60 | 31.74 | 28.41 | -1.25 | Down | 1.00E-04 |
| CerP(d43:2)          | 741.6 | 27.38 | 28.62 | 0.94 | 3.32 | 26.05 | 18.25 | 28.79 | 30.47 | 1.05  | Up   | 1.00E-03 |
| CerP(d43:3)          | 739.6 | 32.28 | 32.93 | 0.62 | 1.73 | 31.30 | 28.48 | 33.23 | 34.45 | 1.02  | Up   | 4.88E-02 |
| CerP(d43:3+pO)       | 755.6 | 18.57 | 24.45 | 5.82 | 0.75 | 2.63  | 22.70 | 22.83 | 25.65 | 1.32  | Up   | 1.00E-04 |

|                |       |       |       |       |      |       |       |       |       |       |      |          |
|----------------|-------|-------|-------|-------|------|-------|-------|-------|-------|-------|------|----------|
| CerP(d43:4)    | 737.6 | 26.31 | 27.43 | 1.13  | 2.93 | 25.29 | 18.25 | 28.38 | 29.24 | 1.04  | Up   | 1.06E-02 |
| CerP(d44:0)    | 759.7 | 13.27 | 15.36 | 10.56 | 0.94 | 2.63  | 14.75 | 26.65 | 18.25 | 1.16  | Up   | 9.26E-01 |
| CerP(d44:3)    | 753.6 | 27.03 | 15.36 | 0.60  | 0.94 | 25.80 | 14.75 | 27.81 | 18.25 | -1.76 | Down | 1.00E-04 |
| CerP(d44:4+pO) | 767.6 | 23.57 | 26.49 | 1.85  | 0.94 | 19.60 | 24.98 | 26.56 | 28.09 | 1.12  | Up   | 3.00E-04 |
| CerP(d44:5)    | 749.6 | 25.33 | 27.73 | 1.40  | 0.82 | 23.47 | 26.53 | 27.25 | 28.90 | 1.09  | Up   | 1.00E-04 |
| CerP(d44:5+pO) | 765.6 | 25.84 | 25.14 | 4.12  | 2.60 | 17.51 | 18.25 | 29.46 | 27.84 | -1.03 | Down | 1.34E-01 |
| CerP(d45:0)    | 773.7 | 20.88 | 26.81 | 7.59  | 1.68 | 2.63  | 23.93 | 27.43 | 29.46 | 1.28  | Up   | 1.06E-02 |
| CerP(d45:2)    | 769.6 | 20.39 | 15.36 | 6.57  | 0.94 | 14.88 | 14.75 | 29.67 | 18.25 | -1.33 | Down | 3.60E-03 |
| CerP(d45:3)    | 767.6 | 32.65 | 33.33 | 0.97  | 1.73 | 30.95 | 29.88 | 33.94 | 35.04 | 1.02  | Up   | 1.09E-01 |
| CerP(d45:4)    | 765.6 | 30.16 | 30.80 | 1.02  | 1.82 | 28.90 | 26.43 | 31.71 | 32.77 | 1.02  | Up   | 3.17E-01 |
| CerP(d45:5)    | 763.6 | 23.01 | 15.36 | 5.35  | 0.94 | 15.24 | 14.75 | 27.74 | 18.25 | -1.5  | Down | 2.00E-04 |
| CerP(d45:6)    | 761.6 | 25.80 | 20.57 | 0.74  | 2.89 | 25.06 | 14.97 | 27.14 | 24.39 | -1.25 | Down | 1.00E-04 |
| CerP(d45:6+pO) | 777.6 | 29.63 | 15.36 | 1.54  | 0.94 | 27.08 | 14.75 | 31.42 | 18.25 | -1.93 | Down | 1.00E-04 |
| CerP(d45:7)    | 759.6 | 14.23 | 15.36 | 7.91  | 0.94 | 2.63  | 14.75 | 26.73 | 18.25 | 1.08  | Up   | 8.33E-01 |
| CerP(d45:8)    | 757.5 | 9.43  | 15.36 | 9.45  | 0.94 | 2.63  | 14.75 | 25.51 | 18.25 | 1.63  | Up   | 2.03E-01 |
| CerP(d46:1+O)  | 801.7 | 12.09 | 15.36 | 5.27  | 0.94 | 2.63  | 14.75 | 17.76 | 18.25 | 1.27  | Up   | 1.48E-01 |
| CerP(d46:4)    | 779.6 | 26.88 | 15.36 | 0.91  | 0.94 | 25.94 | 14.75 | 29.10 | 18.25 | -1.75 | Down | 1.00E-04 |
| CerP(d46:5)    | 777.6 | 16.19 | 15.36 | 8.73  | 0.94 | 2.63  | 14.75 | 22.33 | 18.25 | -1.05 | Down | 6.92E-02 |
| CerP(d46:6+pO) | 791.6 | 23.00 | 24.92 | 2.37  | 2.58 | 18.12 | 18.25 | 25.33 | 27.76 | 1.08  | Up   | 3.12E-02 |
| CerP(d46:7)    | 773.6 | 7.43  | 15.36 | 7.50  | 0.94 | 2.63  | 14.75 | 22.19 | 18.25 | 2.07  | Up   | 1.00E-02 |
| CerP(d46:7+hO) | 789.6 | 6.92  | 16.66 | 8.41  | 3.08 | 2.63  | 14.75 | 23.80 | 24.63 | 2.41  | Up   | 6.60E-03 |
| CerP(d46:8)    | 771.6 | 6.92  | 25.69 | 8.40  | 1.86 | 2.63  | 23.13 | 23.78 | 28.63 | 3.72  | Up   | 1.00E-04 |
| CerP(d47:0)    | 801.7 | 24.21 | 29.79 | 5.17  | 1.48 | 16.39 | 27.46 | 29.42 | 31.42 | 1.23  | Up   | 6.00E-04 |
| CerP(d47:1)    | 799.7 | 22.84 | 15.36 | 9.44  | 0.94 | 2.63  | 14.75 | 31.14 | 18.25 | -1.49 | Down | 7.93E-02 |
| CerP(d47:3)    | 795.7 | 27.69 | 29.96 | 3.28  | 1.47 | 22.02 | 26.21 | 30.65 | 31.40 | 1.08  | Up   | 2.68E-02 |
| CerP(d47:4+pO) | 809.6 | 16.90 | 24.05 | 8.76  | 3.76 | 2.63  | 18.25 | 28.62 | 29.12 | 1.42  | Up   | 2.59E-02 |
| CerP(d47:5)    | 791.6 | 16.92 | 24.07 | 8.77  | 3.75 | 2.63  | 18.25 | 28.65 | 29.14 | 1.42  | Up   | 2.61E-02 |
| CerP(d47:5+pO) | 807.6 | 23.92 | 26.66 | 3.70  | 2.97 | 18.84 | 18.25 | 29.40 | 29.52 | 1.11  | Up   | 7.92E-02 |
| CerP(d47:6)    | 789.6 | 25.05 | 26.80 | 2.67  | 2.85 | 20.47 | 18.25 | 27.73 | 29.88 | 1.07  | Up   | 1.50E-02 |
| CerP(d47:6+pO) | 805.6 | 28.27 | 27.96 | 0.96  | 3.42 | 25.78 | 18.25 | 29.50 | 30.98 | -1.01 | Down | 2.68E-01 |
| CerP(d47:7+hO) | 803.6 | 23.10 | 15.36 | 1.73  | 0.94 | 19.83 | 14.75 | 24.91 | 18.25 | -1.5  | Down | 1.00E-04 |
| CerP(d48:1)    | 813.7 | 20.60 | 15.36 | 9.93  | 0.94 | 2.63  | 14.75 | 27.41 | 18.25 | -1.34 | Down | 2.10E-02 |
| CerP(d48:2+pO) | 827.7 | 22.71 | 15.36 | 1.52  | 0.94 | 19.56 | 14.75 | 23.75 | 18.25 | -1.48 | Down | 1.00E-04 |
| CerP(d48:3)    | 809.7 | 22.74 | 15.36 | 1.54  | 0.94 | 19.56 | 14.75 | 23.75 | 18.25 | -1.48 | Down | 1.00E-04 |
| CerP(d49:0)    | 829.7 | 30.03 | 30.54 | 4.76  | 2.08 | 22.04 | 26.58 | 34.38 | 33.13 | 1.02  | Up   | 4.42E-01 |
| CerP(d49:1)    | 827.7 | 27.77 | 29.75 | 1.18  | 1.78 | 25.44 | 26.69 | 30.04 | 33.13 | 1.07  | Up   | 5.40E-03 |
| CerP(d49:2)    | 825.7 | 26.77 | 27.17 | 0.43  | 1.94 | 25.85 | 23.19 | 27.51 | 29.38 | 1.01  | Up   | 5.01E-01 |
| CerP(d49:3)    | 823.7 | 26.23 | 29.59 | 5.52  | 3.70 | 14.05 | 18.25 | 30.45 | 32.20 | 1.13  | Up   | 2.09E-02 |

|                  |       |       |       |      |      |       |       |       |       |       |      |          |
|------------------|-------|-------|-------|------|------|-------|-------|-------|-------|-------|------|----------|
| CerP(d49:4)      | 821.7 | 25.93 | 29.56 | 4.82 | 3.67 | 18.89 | 18.25 | 30.12 | 31.68 | 1.14  | Up   | 5.60E-03 |
| CerP(d50:0)      | 843.7 | 23.72 | 29.24 | 9.64 | 3.66 | 2.63  | 18.25 | 30.95 | 32.40 | 1.23  | Up   | 2.95E-01 |
| CerP(d50:1)      | 841.7 | 23.19 | 16.98 | 2.37 | 3.99 | 19.11 | 14.75 | 25.97 | 28.13 | -1.37 | Down | 5.00E-04 |
| CerP(d50:1+pO)   | 857.7 | 24.44 | 15.36 | 2.41 | 0.94 | 21.48 | 14.75 | 28.22 | 18.25 | -1.59 | Down | 1.00E-04 |
| CerP(d50:2)      | 839.7 | 24.47 | 15.36 | 2.41 | 0.94 | 21.63 | 14.75 | 28.30 | 18.25 | -1.59 | Down | 1.00E-04 |
| CerP(d50:3)      | 837.7 | 16.46 | 15.36 | 2.55 | 0.94 | 13.50 | 14.75 | 21.90 | 18.25 | -1.07 | Down | 2.95E-01 |
| CerP(d50:3+pO)   | 853.7 | 16.49 | 15.36 | 1.99 | 0.94 | 14.03 | 14.75 | 20.53 | 18.25 | -1.07 | Down | 3.47E-01 |
| CerP(d50:5)      | 833.7 | 20.09 | 15.36 | 9.74 | 0.94 | 2.63  | 14.75 | 27.11 | 18.25 | -1.31 | Down | 1.03E-01 |
| CerP(d51:0)      | 857.8 | 34.31 | 35.88 | 0.77 | 1.29 | 32.97 | 31.96 | 35.04 | 36.45 | 1.05  | Up   | 6.00E-04 |
| CerP(d51:1)      | 855.7 | 27.92 | 29.77 | 2.21 | 2.68 | 24.48 | 22.43 | 30.68 | 32.83 | 1.07  | Up   | 2.88E-02 |
| CerP(d51:2)      | 853.7 | 28.16 | 28.21 | 1.42 | 2.23 | 25.34 | 23.39 | 30.45 | 30.58 | 1     | Up   | 9.47E-01 |
| CerP(d51:3)      | 851.7 | 28.70 | 25.48 | 2.01 | 4.50 | 25.37 | 15.58 | 31.14 | 33.70 | -1.13 | Down | 3.92E-02 |
| CerP(d51:4)      | 849.7 | 33.00 | 33.65 | 0.49 | 1.57 | 32.48 | 30.79 | 34.30 | 35.26 | 1.02  | Up   | 1.39E-01 |
| CerP(d51:5)      | 847.7 | 24.60 | 30.19 | 4.54 | 3.87 | 20.56 | 18.25 | 30.47 | 32.40 | 1.23  | Up   | 6.10E-03 |
| CerP(d51:5+pO)   | 863.7 | 26.14 | 26.91 | 0.88 | 1.58 | 24.22 | 24.40 | 27.18 | 28.92 | 1.03  | Up   | 1.70E-01 |
| CerP(d52:0)      | 871.8 | 27.77 | 29.18 | 2.18 | 3.58 | 24.40 | 18.25 | 30.51 | 32.08 | 1.05  | Up   | 2.27E-02 |
| CerP(d52:3)      | 865.7 | 28.25 | 22.12 | 0.55 | 4.21 | 27.49 | 14.95 | 29.38 | 27.39 | -1.28 | Down | 4.00E-04 |
| CerP(d52:3+pO)   | 881.7 | 21.45 | 15.36 | 3.64 | 0.94 | 15.59 | 14.75 | 25.60 | 18.25 | -1.4  | Down | 2.00E-04 |
| CerP(d52:4)      | 863.7 | 31.71 | 31.89 | 0.67 | 1.94 | 29.98 | 29.36 | 32.48 | 34.17 | 1.01  | Up   | 8.29E-01 |
| CerP(d52:5+pO)   | 877.7 | 25.28 | 25.28 | 1.22 | 2.60 | 21.98 | 18.25 | 26.22 | 27.77 | -1    | Down | 2.81E-01 |
| CerP(d52:6)      | 859.7 | 25.40 | 15.36 | 2.94 | 0.94 | 18.32 | 14.75 | 27.97 | 18.25 | -1.65 | Down | 1.00E-04 |
| CerP(d52:6+pO)   | 875.7 | 26.12 | 26.87 | 1.06 | 3.15 | 23.65 | 18.25 | 27.54 | 30.08 | 1.03  | Up   | 1.18E-01 |
| CerP(d53:0)      | 885.8 | 33.81 | 35.10 | 0.46 | 1.04 | 33.23 | 32.08 | 34.45 | 35.78 | 1.04  | Up   | 7.00E-04 |
| CerP(d53:0+pO+O) | 917.8 | 21.70 | 15.36 | 5.05 | 0.94 | 15.67 | 14.75 | 28.25 | 18.25 | -1.41 | Down | 1.00E-04 |
| CerP(d53:1)      | 883.8 | 28.21 | 32.73 | 5.00 | 1.44 | 20.22 | 30.42 | 32.97 | 34.38 | 1.16  | Up   | 1.05E-02 |
| CerP(d53:2)      | 881.8 | 30.55 | 18.48 | 1.77 | 3.84 | 28.62 | 14.75 | 33.46 | 24.03 | -1.65 | Down | 1.00E-04 |
| CerP(d53:3)      | 879.7 | 30.56 | 15.36 | 1.25 | 0.94 | 28.04 | 14.75 | 31.68 | 18.25 | -1.99 | Down | 1.00E-04 |
| CerP(d53:4)      | 877.7 | 30.53 | 30.77 | 1.17 | 1.56 | 27.33 | 28.87 | 31.96 | 32.83 | 1.01  | Up   | 8.05E-01 |
| CerP(d54:0)      | 899.8 | 27.81 | 15.36 | 1.28 | 0.94 | 24.75 | 14.75 | 29.73 | 18.25 | -1.81 | Down | 1.00E-04 |
| CerP(d54:1)      | 897.8 | 25.77 | 15.36 | 4.18 | 0.94 | 15.16 | 14.75 | 29.04 | 18.25 | -1.68 | Down | 1.00E-04 |
| CerP(d54:3)      | 893.8 | 20.51 | 15.36 | 4.97 | 0.94 | 14.68 | 14.75 | 27.88 | 18.25 | -1.34 | Down | 1.70E-03 |
| CerP(d54:4)      | 891.7 | 22.10 | 15.36 | 8.77 | 0.94 | 2.63  | 14.75 | 28.27 | 18.25 | -1.44 | Down | 3.63E-02 |
| CerP(d54:4+pO)   | 907.7 | 20.55 | 15.36 | 4.73 | 0.94 | 15.22 | 14.75 | 27.38 | 18.25 | -1.34 | Down | 1.00E-04 |
| CerP(d55:0)      | 913.8 | 33.20 | 26.31 | 0.43 | 3.39 | 32.40 | 21.25 | 33.80 | 31.83 | -1.26 | Down | 1.00E-04 |
| CerP(d55:1)      | 911.8 | 33.51 | 34.02 | 0.84 | 0.98 | 32.62 | 31.68 | 34.76 | 35.39 | 1.02  | Up   | 1.02E-01 |
| CerP(d55:2)      | 909.8 | 34.93 | 33.73 | 1.30 | 1.57 | 31.66 | 30.95 | 36.45 | 35.58 | -1.04 | Down | 3.28E-02 |
| CerP(d55:3)      | 907.8 | 27.04 | 29.34 | 5.77 | 2.49 | 17.21 | 25.82 | 34.86 | 32.08 | 1.08  | Up   | 4.06E-01 |
| CerP(d55:4)      | 905.8 | 24.37 | 15.36 | 4.39 | 0.94 | 19.35 | 14.75 | 30.58 | 18.25 | -1.59 | Down | 1.00E-04 |

|                  |       |       |       |       |      |       |       |       |       |       |      |          |
|------------------|-------|-------|-------|-------|------|-------|-------|-------|-------|-------|------|----------|
| CerP(d55:5)      | 903.7 | 25.95 | 15.36 | 3.15  | 0.94 | 19.84 | 14.75 | 29.50 | 18.25 | -1.69 | Down | 1.00E-04 |
| CerP(d55:7)      | 899.7 | 17.46 | 15.36 | 8.26  | 0.94 | 2.63  | 14.75 | 26.34 | 18.25 | -1.14 | Down | 7.93E-02 |
| CerP(d56:0+pO)   | 943.8 | 17.03 | 15.36 | 6.34  | 0.94 | 4.21  | 14.75 | 22.14 | 18.25 | -1.11 | Down | 7.92E-02 |
| CerP(d56:1)      | 925.8 | 26.67 | 18.14 | 2.58  | 4.42 | 20.88 | 14.75 | 29.00 | 28.59 | -1.47 | Down | 1.10E-03 |
| CerP(d56:2)      | 923.8 | 23.88 | 26.88 | 5.00  | 3.14 | 15.52 | 18.25 | 28.37 | 30.42 | 1.13  | Up   | 2.07E-01 |
| CerP(d56:2+pOEO) | 969.8 | 8.13  | 15.36 | 5.53  | 0.94 | 2.63  | 14.75 | 15.84 | 18.25 | 1.89  | Up   | 8.00E-04 |
| CerP(d56:3+pO)   | 937.8 | 12.51 | 15.36 | 9.58  | 0.94 | 2.63  | 14.75 | 23.83 | 18.25 | 1.23  | Up   | 6.88E-01 |
| CerP(d56:4)      | 919.8 | 14.53 | 17.53 | 9.62  | 4.28 | 2.63  | 14.75 | 23.77 | 28.35 | 1.21  | Up   | 8.78E-01 |
| CerP(d57:0)      | 941.9 | 31.85 | 25.15 | 0.89  | 4.54 | 30.15 | 15.07 | 33.37 | 31.10 | -1.27 | Down | 3.00E-04 |
| CerP(d57:1)      | 939.8 | 32.58 | 25.21 | 1.06  | 4.11 | 31.40 | 15.07 | 34.63 | 30.01 | -1.29 | Down | 1.00E-04 |
| CerP(d57:2)      | 937.8 | 29.02 | 22.23 | 4.70  | 3.77 | 19.59 | 14.86 | 32.83 | 27.23 | -1.31 | Down | 4.20E-03 |
| CerP(d57:3)      | 935.8 | 33.03 | 34.66 | 3.47  | 1.37 | 22.86 | 30.65 | 34.86 | 35.58 | 1.05  | Up   | 7.10E-03 |
| CerP(d57:4)      | 933.8 | 29.02 | 29.27 | 6.64  | 2.16 | 15.75 | 25.85 | 34.38 | 31.58 | 1.01  | Up   | 3.10E-01 |
| CerP(d58:0)      | 955.9 | 25.49 | 16.91 | 2.68  | 2.76 | 18.67 | 14.75 | 28.05 | 21.60 | -1.51 | Down | 1.00E-04 |
| CerP(d58:4)      | 947.8 | 20.08 | 15.36 | 7.01  | 0.94 | 2.63  | 14.75 | 25.73 | 18.25 | -1.31 | Down | 1.06E-02 |
| CerP(d59:0)      | 969.9 | 22.89 | 15.36 | 8.13  | 0.94 | 4.21  | 14.75 | 30.37 | 18.25 | -1.49 | Down | 7.00E-04 |
| CerP(d59:1)      | 967.9 | 26.25 | 15.36 | 3.78  | 0.94 | 20.62 | 14.75 | 31.42 | 18.25 | -1.71 | Down | 1.00E-04 |
| CerP(d59:3)      | 963.8 | 31.66 | 31.75 | 0.53  | 2.04 | 30.22 | 26.08 | 32.14 | 34.38 | 1     | Up   | 4.41E-01 |
| CerP(d59:4)      | 961.8 | 31.30 | 31.37 | 0.42  | 0.98 | 30.77 | 29.90 | 32.02 | 33.04 | 1     | Up   | 8.19E-01 |
| CerP(d59:5)      | 959.8 | 25.59 | 32.30 | 9.40  | 1.73 | 2.63  | 27.60 | 31.96 | 34.17 | 1.26  | Up   | 7.00E-04 |
| CerP(d59:6)      | 957.8 | 25.13 | 29.50 | 5.94  | 1.57 | 16.56 | 26.16 | 30.42 | 31.83 | 1.17  | Up   | 1.09E-01 |
| CerP(d60:2)      | 979.9 | 8.69  | 15.36 | 6.49  | 0.94 | 2.63  | 14.75 | 17.94 | 18.25 | 1.77  | Up   | 7.35E-02 |
| CerP(d61:1)      | 995.9 | 19.87 | 15.36 | 8.79  | 0.94 | 4.21  | 14.75 | 29.14 | 18.25 | -1.29 | Down | 1.29E-02 |
| CerP(d61:2)      | 993.9 | 24.21 | 15.36 | 3.27  | 0.94 | 19.43 | 14.75 | 28.65 | 18.25 | -1.58 | Down | 1.00E-04 |
| CerP(d61:3)      | 991.9 | 28.47 | 15.36 | 0.90  | 0.94 | 27.46 | 14.75 | 30.12 | 18.25 | -1.85 | Down | 1.00E-04 |
| CerP(d62:0+pOEO) | 1058  | 15.15 | 15.36 | 7.60  | 0.94 | 2.63  | 14.75 | 23.95 | 18.25 | 1.01  | Up   | 1.51E-01 |
| CerP(d63:0)      | 1026  | 12.66 | 15.36 | 10.95 | 0.94 | 2.63  | 14.75 | 25.98 | 18.25 | 1.21  | Up   | 6.88E-01 |
| CerP(d63:1)      | 1024  | 16.72 | 15.36 | 9.79  | 0.94 | 2.63  | 14.75 | 27.66 | 18.25 | -1.09 | Down | 8.05E-01 |
| CerP(d63:1+pO)   | 1040  | 6.32  | 15.36 | 4.84  | 0.94 | 2.63  | 14.75 | 17.20 | 18.25 | 2.43  | Up   | 7.00E-04 |
| CerP(d63:2)      | 1022  | 18.31 | 15.36 | 8.41  | 0.94 | 2.63  | 14.75 | 26.71 | 18.25 | -1.19 | Down | 1.78E-02 |
| CerP(d64:3+hOEO) | 1080  | 22.59 | 22.63 | 1.87  | 2.99 | 17.30 | 15.59 | 24.02 | 25.65 | 1     | Up   | 7.12E-01 |
| CerP(d64:3EO)    | 1064  | 19.63 | 15.36 | 6.91  | 0.94 | 2.63  | 14.75 | 24.77 | 18.25 | -1.28 | Down | 1.16E-02 |
| CerP(d65:4+pO)   | 1062  | 18.59 | 15.36 | 4.70  | 0.94 | 10.08 | 14.75 | 23.73 | 18.25 | -1.21 | Down | 2.88E-01 |
| CerP(d66:0EO)    | 1098  | 16.97 | 15.36 | 2.02  | 0.94 | 12.09 | 14.75 | 19.11 | 18.25 | -1.1  | Down | 3.37E-02 |
| CerP(d76:3EO)    | 1232  | 4.60  | 15.36 | 3.55  | 0.94 | 2.63  | 14.75 | 13.74 | 18.25 | 3.34  | Up   | 1.00E-04 |
| CerP(d79:3+hOEO) | 1290  | 13.82 | 18.54 | 6.26  | 3.77 | 2.63  | 14.97 | 18.47 | 25.20 | 1.34  | Up   | 3.10E-01 |
| CerP(d81:1EO)    | 1306  | 13.50 | 15.36 | 8.59  | 0.94 | 2.63  | 14.75 | 22.32 | 18.25 | 1.14  | Up   | 3.72E-01 |
| CerP(d83:2EO)    | 1332  | 12.79 | 23.41 | 9.24  | 4.63 | 2.63  | 15.11 | 24.13 | 27.73 | 1.83  | Up   | 2.80E-03 |

|                   |       |       |       |       |       |       |       |       |       |       |      |          |
|-------------------|-------|-------|-------|-------|-------|-------|-------|-------|-------|-------|------|----------|
| SM(d16:0+pO)      | 468.3 | 19.04 | 22.81 | 3.74  | 3.74  | 12.99 | 21.21 | 23.56 | 27.16 | 1.2   | Up   | 5.95E-02 |
| SM(d16:1/16:0)    | 674.5 | 24.35 | 15.36 | 4.71  | 4.71  | 17.22 | 14.75 | 28.48 | 18.25 | -1.59 | Down | 1.00E-04 |
| SM(d16:1/18:3)    | 696.5 | 12.34 | 15.36 | 9.58  | 9.58  | 2.63  | 14.75 | 25.02 | 18.25 | 1.25  | Up   | 6.00E-01 |
| SM(d16:1/19:1)    | 714.6 | 20.62 | 25.01 | 7.02  | 7.02  | 2.63  | 18.25 | 25.51 | 27.00 | 1.21  | Up   | 1.26E-02 |
| SM(d16:1/21:3)    | 738.6 | 21.16 | 15.36 | 2.57  | 2.57  | 17.08 | 14.75 | 23.53 | 18.25 | -1.38 | Down | 1.00E-04 |
| SM(d16:1/24:1)    | 784.6 | 23.07 | 15.36 | 5.72  | 5.72  | 15.59 | 14.75 | 30.25 | 18.25 | -1.5  | Down | 1.00E-04 |
| SM(d17:0/19:0)    | 732.6 | 20.82 | 15.36 | 11.88 | 11.88 | 2.63  | 14.75 | 29.16 | 18.25 | -1.36 | Down | 6.92E-02 |
| SM(d17:0/25:0)    | 816.7 | 26.38 | 27.59 | 2.39  | 2.39  | 23.93 | 18.25 | 29.88 | 29.55 | 1.05  | Up   | 2.55E-01 |
| SM(d17:1/16:0)    | 688.6 | 27.32 | 27.99 | 1.28  | 1.28  | 25.97 | 18.25 | 29.73 | 29.82 | 1.02  | Up   | 3.92E-02 |
| SM(d17:1/18:0)    | 716.6 | 26.62 | 15.36 | 2.97  | 2.97  | 23.04 | 14.75 | 30.95 | 18.25 | -1.73 | Down | 1.00E-04 |
| SM(d17:1/18:3)    | 710.5 | 12.16 | 15.36 | 9.44  | 9.44  | 2.63  | 14.75 | 23.93 | 18.25 | 1.26  | Up   | 9.26E-01 |
| SM(d17:1/20:3)    | 738.6 | 17.80 | 23.73 | 4.45  | 4.45  | 13.80 | 18.25 | 25.03 | 26.21 | 1.33  | Up   | 4.20E-03 |
| SM(d18:0/18:1)    | 730.6 | 29.40 | 15.36 | 4.92  | 4.92  | 18.55 | 14.75 | 35.39 | 18.25 | -1.91 | Down | 1.00E-04 |
| SM(d18:0+pO/16:1) | 718.6 | 22.36 | 23.22 | 1.59  | 1.59  | 20.84 | 18.25 | 26.05 | 24.51 | 1.04  | Up   | 6.94E-02 |
| SM(d18:1/15:0)    | 688.6 | 16.09 | 24.03 | 10.68 | 10.68 | 2.63  | 18.25 | 24.21 | 25.98 | 1.49  | Up   | 3.10E-03 |
| SM(d18:1/16:0)    | 702.6 | 33.47 | 33.24 | 0.62  | 0.62  | 32.83 | 29.24 | 34.45 | 34.76 | -1.01 | Down | 5.79E-01 |
| SM(d18:1/16:1)    | 700.6 | 27.95 | 29.38 | 1.14  | 1.14  | 26.54 | 27.66 | 30.30 | 30.25 | 1.05  | Up   | 2.00E-03 |
| SM(d18:1/17:1)    | 714.6 | 17.23 | 15.36 | 6.97  | 6.97  | 2.63  | 14.75 | 25.75 | 18.25 | -1.12 | Down | 9.76E-01 |
| SM(d18:1/18:0)    | 730.6 | 29.65 | 33.53 | 5.78  | 5.78  | 20.52 | 30.08 | 35.04 | 35.26 | 1.13  | Up   | 7.93E-02 |
| SM(d18:1/18:1)    | 728.6 | 31.35 | 31.89 | 0.95  | 0.95  | 30.19 | 27.82 | 32.70 | 33.80 | 1.02  | Up   | 3.87E-01 |
| SM(d18:1/18:3)    | 724.6 | 23.72 | 15.36 | 3.95  | 3.95  | 17.26 | 14.75 | 27.00 | 18.25 | -1.54 | Down | 1.00E-04 |
| SM(d18:1/19:0)    | 744.6 | 27.56 | 28.30 | 1.28  | 1.28  | 26.15 | 18.25 | 30.08 | 30.37 | 1.03  | Up   | 4.39E-02 |
| SM(d18:1/19:1)    | 742.6 | 24.18 | 25.24 | 1.24  | 1.24  | 21.28 | 18.25 | 25.93 | 27.05 | 1.04  | Up   | 1.56E-02 |
| SM(d18:1/20:1)    | 756.6 | 27.44 | 15.36 | 1.02  | 1.02  | 25.95 | 14.75 | 28.87 | 18.25 | -1.79 | Down | 1.00E-04 |
| SM(d18:1/20:2)    | 754.6 | 18.71 | 15.36 | 8.45  | 8.45  | 2.63  | 14.75 | 24.67 | 18.25 | -1.22 | Down | 6.04E-02 |
| SM(d18:1/20:3)    | 752.6 | 28.23 | 28.62 | 0.72  | 0.72  | 27.14 | 18.25 | 29.36 | 31.93 | 1.01  | Up   | 2.10E-02 |
| SM(d18:1/22:0)    | 786.7 | 26.28 | 31.31 | 6.92  | 6.92  | 14.66 | 27.68 | 31.83 | 33.13 | 1.19  | Up   | 2.68E-02 |
| SM(d18:1/22:1)    | 784.6 | 26.53 | 29.39 | 4.09  | 4.09  | 19.57 | 18.25 | 30.30 | 31.68 | 1.11  | Up   | 5.60E-03 |
| SM(d18:1/23:0)    | 800.7 | 30.32 | 30.96 | 0.43  | 0.43  | 29.73 | 26.59 | 31.37 | 32.70 | 1.02  | Up   | 6.03E-02 |
| SM(d18:1/23:1)    | 798.7 | 30.11 | 30.87 | 0.54  | 0.54  | 29.22 | 25.46 | 31.10 | 32.55 | 1.03  | Up   | 3.91E-02 |
| SM(d18:1/24:0)    | 814.7 | 30.19 | 15.36 | 0.48  | 0.48  | 29.50 | 14.75 | 30.82 | 18.25 | -1.97 | Down | 1.00E-04 |
| SM(d18:1/24:1)    | 812.7 | 33.91 | 34.39 | 0.58  | 0.58  | 33.04 | 30.74 | 35.26 | 35.58 | 1.01  | Up   | 4.74E-02 |
| SM(d18:1/24:2)    | 810.7 | 30.34 | 31.57 | 0.70  | 0.70  | 29.52 | 26.46 | 31.42 | 33.37 | 1.04  | Up   | 1.06E-02 |
| SM(d18:1/25:0)    | 828.7 | 29.33 | 15.36 | 0.75  | 0.75  | 28.71 | 14.75 | 31.14 | 18.25 | -1.91 | Down | 1.00E-04 |
| SM(d18:1/25:1)    | 826.7 | 31.85 | 31.48 | 0.64  | 0.64  | 30.42 | 27.61 | 32.62 | 33.89 | -1.01 | Down | 5.97E-01 |
| SM(d18:1/25:2)    | 824.7 | 27.41 | 28.29 | 0.67  | 0.67  | 26.77 | 27.18 | 28.85 | 29.55 | 1.03  | Up   | 1.15E-02 |
| SM(d18:1/26:0)    | 842.7 | 28.26 | 28.59 | 0.78  | 0.78  | 26.66 | 25.77 | 28.95 | 30.06 | 1.01  | Up   | 1.66E-01 |
| SM(d18:1/26:1)    | 840.7 | 31.14 | 31.02 | 0.87  | 0.87  | 29.04 | 28.09 | 32.48 | 33.29 | -1    | Down | 8.38E-01 |

|                   |       |       |       |      |      |       |       |       |       |       |      |          |
|-------------------|-------|-------|-------|------|------|-------|-------|-------|-------|-------|------|----------|
| SM(d18:1/26:2)    | 838.7 | 27.52 | 28.56 | 0.44 | 0.44 | 27.04 | 26.95 | 28.63 | 30.12 | 1.04  | Up   | 2.25E-02 |
| SM(d18:1/26:4)    | 834.7 | 15.82 | 27.28 | 8.41 | 8.41 | 2.63  | 24.79 | 26.51 | 29.76 | 1.72  | Up   | 1.10E-03 |
| SM(d18:1/27:1)    | 854.7 | 25.81 | 25.55 | 1.08 | 1.08 | 23.50 | 18.25 | 27.74 | 27.81 | -1.01 | Down | 4.42E-01 |
| SM(d18:1/28:4)    | 862.7 | 20.73 | 15.36 | 6.63 | 6.63 | 2.63  | 14.75 | 25.67 | 18.25 | -1.35 | Down | 5.00E-04 |
| SM(d18:2/18:1)    | 726.6 | 23.21 | 24.45 | 1.27 | 1.27 | 20.77 | 18.25 | 24.69 | 26.21 | 1.05  | Up   | 3.50E-03 |
| SM(d18:2/18:2)    | 724.6 | 21.95 | 27.27 | 4.67 | 4.67 | 18.25 | 18.25 | 28.42 | 29.67 | 1.24  | Up   | 1.78E-02 |
| SM(d18:2/18:3)    | 722.5 | 13.57 | 15.36 | 8.98 | 8.98 | 2.63  | 14.75 | 24.67 | 18.25 | 1.13  | Up   | 1.00E+00 |
| SM(d18:2/20:3)    | 750.6 | 25.75 | 26.95 | 0.94 | 0.94 | 23.96 | 24.40 | 27.58 | 28.72 | 1.05  | Up   | 8.70E-03 |
| SM(d18:2/22:1)    | 782.6 | 24.81 | 26.19 | 1.48 | 1.48 | 21.14 | 18.25 | 25.95 | 28.13 | 1.06  | Up   | 8.00E-04 |
| SM(d20:1/19:0)    | 772.6 | 28.01 | 28.52 | 0.59 | 0.59 | 27.35 | 18.25 | 29.24 | 30.42 | 1.02  | Up   | 8.90E-03 |
| SM(d20:1+hO/16:0) | 746.6 | 20.89 | 22.89 | 2.35 | 2.35 | 15.16 | 18.25 | 23.63 | 24.32 | 1.1   | Up   | 1.38E-02 |
| SM(d30:1)         | 646.5 | 22.89 | 24.32 | 1.10 | 1.10 | 21.35 | 18.25 | 25.37 | 26.71 | 1.06  | Up   | 7.40E-03 |
| SM(d30:3)         | 642.5 | 10.25 | 15.36 | 6.10 | 6.10 | 2.63  | 14.75 | 16.22 | 18.25 | 1.5   | Up   | 1.48E-02 |
| SM(d31:1)         | 660.5 | 22.15 | 24.03 | 1.24 | 1.24 | 20.24 | 18.25 | 24.66 | 25.56 | 1.08  | Up   | 3.60E-03 |
| SM(d31:2)         | 658.5 | 20.45 | 15.36 | 3.45 | 3.45 | 14.19 | 14.75 | 24.90 | 18.25 | -1.33 | Down | 2.30E-03 |
| SM(d32:0)         | 676.6 | 23.69 | 25.46 | 0.96 | 0.96 | 22.67 | 18.25 | 25.56 | 27.16 | 1.07  | Up   | 4.00E-04 |
| SM(d32:1)         | 674.5 | 26.58 | 28.09 | 2.50 | 2.50 | 23.10 | 18.25 | 30.51 | 29.80 | 1.06  | Up   | 1.03E-01 |
| SM(d32:2)         | 672.5 | 24.29 | 15.36 | 0.92 | 0.92 | 23.01 | 14.75 | 25.91 | 18.25 | -1.58 | Down | 1.00E-04 |
| SM(d32:5)         | 666.5 | 16.29 | 15.36 | 7.00 | 7.00 | 2.63  | 14.75 | 27.59 | 18.25 | -1.06 | Down | 7.42E-02 |
| SM(d33:0)         | 690.6 | 21.94 | 15.36 | 0.73 | 0.73 | 21.18 | 14.75 | 23.34 | 18.25 | -1.43 | Down | 1.00E-04 |
| SM(d33:4)         | 682.5 | 26.87 | 15.36 | 0.90 | 0.90 | 24.67 | 14.75 | 27.89 | 18.25 | -1.75 | Down | 1.00E-04 |
| SM(d33:5)         | 680.5 | 18.94 | 26.27 | 2.98 | 2.98 | 17.12 | 24.74 | 27.19 | 31.19 | 1.39  | Up   | 2.00E-04 |
| SM(d34:0)         | 704.6 | 28.68 | 30.25 | 0.86 | 0.86 | 27.41 | 26.39 | 29.90 | 31.74 | 1.05  | Up   | 2.80E-03 |
| SM(d34:0+pO)      | 720.6 | 18.90 | 24.10 | 2.47 | 2.47 | 16.39 | 18.25 | 22.90 | 25.53 | 1.27  | Up   | 1.00E-04 |
| SM(d34:1)         | 702.6 | 11.50 | 21.07 | 6.74 | 6.74 | 2.63  | 15.58 | 20.01 | 22.37 | 1.83  | Up   | 2.00E-04 |
| SM(d34:1+pO)      | 718.6 | 22.22 | 15.36 | 2.25 | 2.25 | 17.15 | 14.75 | 24.16 | 18.25 | -1.45 | Down | 1.00E-04 |
| SM(d34:2)         | 700.6 | 26.53 | 21.00 | 4.04 | 4.04 | 17.22 | 15.59 | 29.60 | 22.66 | -1.26 | Down | 2.80E-03 |
| SM(d34:2+hO)      | 716.5 | 20.55 | 15.36 | 2.60 | 2.60 | 15.79 | 14.75 | 24.86 | 18.25 | -1.34 | Down | 1.00E-04 |
| SM(d34:4)         | 696.5 | 20.39 | 23.56 | 2.83 | 2.83 | 15.27 | 18.25 | 23.09 | 24.98 | 1.16  | Up   | 1.00E-04 |
| SM(d34:5+hO)      | 710.5 | 17.03 | 15.36 | 6.23 | 6.23 | 2.63  | 14.75 | 28.59 | 18.25 | -1.11 | Down | 3.74E-02 |
| SM(d34:6+pO)      | 708.5 | 12.81 | 15.36 | 8.08 | 8.08 | 2.63  | 14.75 | 19.27 | 18.25 | 1.2   | Up   | 3.09E-01 |
| SM(d35:0)         | 718.6 | 21.44 | 15.36 | 2.10 | 2.10 | 17.26 | 14.75 | 23.29 | 18.25 | -1.4  | Down | 1.00E-04 |
| SM(d35:1)         | 716.6 | 25.24 | 23.65 | 4.71 | 4.71 | 16.05 | 22.20 | 29.27 | 25.60 | -1.07 | Down | 2.88E-01 |
| SM(d35:4)         | 710.5 | 19.23 | 22.72 | 2.78 | 2.78 | 14.10 | 18.25 | 21.93 | 24.37 | 1.18  | Up   | 3.00E-04 |
| SM(d35:5+pO)      | 724.5 | 19.58 | 15.36 | 7.42 | 7.42 | 2.63  | 14.75 | 28.41 | 18.25 | -1.27 | Down | 1.29E-02 |
| SM(d36:0+pO)      | 748.6 | 18.21 | 23.35 | 2.83 | 2.83 | 14.77 | 18.25 | 23.00 | 25.09 | 1.28  | Up   | 1.00E-04 |
| SM(d36:3)         | 726.6 | 18.20 | 15.36 | 4.80 | 4.80 | 13.84 | 14.75 | 25.34 | 18.25 | -1.18 | Down | 5.25E-01 |
| SM(d36:5)         | 722.5 | 20.82 | 23.46 | 1.73 | 1.73 | 17.93 | 18.25 | 22.63 | 24.57 | 1.13  | Up   | 1.00E-04 |

|              |       |       |       |       |       |       |       |       |       |       |      |          |
|--------------|-------|-------|-------|-------|-------|-------|-------|-------|-------|-------|------|----------|
| SM(d37:0+pO) | 762.6 | 21.21 | 15.36 | 3.18  | 3.18  | 15.59 | 14.75 | 25.49 | 18.25 | -1.38 | Down | 1.00E-04 |
| SM(d37:5)    | 736.6 | 11.27 | 15.36 | 6.92  | 6.92  | 2.63  | 14.75 | 18.03 | 18.25 | 1.36  | Up   | 6.44E-01 |
| SM(d38:1)    | 758.6 | 31.28 | 19.71 | 0.59  | 0.59  | 30.37 | 15.15 | 31.96 | 22.14 | -1.59 | Down | 1.00E-04 |
| SM(d38:2)    | 756.6 | 14.09 | 27.43 | 8.70  | 8.70  | 2.63  | 18.25 | 29.20 | 29.42 | 1.95  | Up   | 1.00E-03 |
| SM(d38:2+hO) | 772.6 | 23.11 | 15.36 | 2.51  | 2.51  | 19.01 | 14.75 | 25.32 | 18.25 | -1.5  | Down | 1.00E-04 |
| SM(d38:4)    | 752.6 | 19.99 | 15.36 | 8.97  | 8.97  | 2.63  | 14.75 | 25.75 | 18.25 | -1.3  | Down | 1.27E-02 |
| SM(d38:6)    | 748.6 | 25.65 | 27.12 | 1.82  | 1.82  | 20.81 | 24.98 | 27.20 | 29.30 | 1.06  | Up   | 1.18E-01 |
| SM(d38:7+hO) | 762.5 | 7.13  | 15.36 | 5.73  | 5.73  | 2.63  | 14.75 | 17.64 | 18.25 | 2.15  | Up   | 7.10E-03 |
| SM(d39:4)    | 766.6 | 21.73 | 15.36 | 3.99  | 3.99  | 14.61 | 14.75 | 25.61 | 18.25 | -1.41 | Down | 7.00E-04 |
| SM(d39:6+pO) | 778.6 | 21.84 | 15.36 | 2.69  | 2.69  | 19.08 | 14.75 | 25.97 | 18.25 | -1.42 | Down | 1.00E-04 |
| SM(d40:1)    | 786.7 | 24.26 | 15.36 | 5.54  | 5.54  | 19.01 | 14.75 | 31.62 | 18.25 | -1.58 | Down | 1.00E-04 |
| SM(d40:4+pO) | 796.6 | 11.65 | 26.01 | 9.81  | 9.81  | 2.63  | 18.25 | 25.39 | 28.63 | 2.23  | Up   | 4.00E-04 |
| SM(d40:6+pO) | 792.6 | 18.74 | 21.27 | 3.77  | 3.77  | 11.60 | 14.95 | 22.69 | 24.13 | 1.13  | Up   | 2.25E-02 |
| SM(d41:0)    | 802.7 | 27.25 | 18.59 | 0.58  | 0.58  | 26.48 | 14.86 | 28.38 | 26.87 | -1.47 | Down | 1.00E-04 |
| SM(d41:3)    | 796.6 | 25.00 | 25.11 | 0.83  | 0.83  | 23.58 | 18.25 | 26.43 | 26.69 | 1     | Up   | 7.92E-02 |
| SM(d41:4)    | 794.6 | 19.36 | 15.36 | 3.29  | 3.29  | 13.45 | 14.75 | 22.44 | 18.25 | -1.26 | Down | 2.27E-02 |
| SM(d41:6+pO) | 806.6 | 21.04 | 15.36 | 4.97  | 4.97  | 14.19 | 14.75 | 25.16 | 18.25 | -1.37 | Down | 2.68E-02 |
| SM(d42:0)    | 816.7 | 21.73 | 15.36 | 9.46  | 9.46  | 2.63  | 14.75 | 28.48 | 18.25 | -1.41 | Down | 2.88E-01 |
| SM(d42:1)    | 814.7 | 25.32 | 15.36 | 3.99  | 3.99  | 19.65 | 14.75 | 31.45 | 18.25 | -1.65 | Down | 1.00E-04 |
| SM(d42:1+pO) | 830.7 | 26.50 | 27.53 | 0.48  | 0.48  | 25.90 | 18.25 | 27.23 | 30.35 | 1.04  | Up   | 1.20E-03 |
| SM(d42:4+pO) | 824.6 | 12.86 | 24.12 | 9.92  | 9.92  | 2.63  | 18.25 | 26.37 | 26.10 | 1.88  | Up   | 4.10E-03 |
| SM(d42:5+pO) | 822.6 | 15.04 | 15.36 | 7.69  | 7.69  | 2.63  | 14.75 | 24.98 | 18.25 | 1.02  | Up   | 2.60E-01 |
| SM(d43:0)    | 830.7 | 25.69 | 27.00 | 0.71  | 0.71  | 24.44 | 24.87 | 27.06 | 28.20 | 1.05  | Up   | 1.00E-03 |
| SM(d44:0)    | 844.7 | 22.56 | 30.24 | 7.14  | 7.14  | 15.44 | 25.61 | 31.74 | 33.37 | 1.34  | Up   | 3.92E-02 |
| SM(d44:4+pO) | 852.7 | 16.43 | 15.36 | 6.62  | 6.62  | 4.21  | 14.75 | 25.31 | 18.25 | -1.07 | Down | 1.17E-01 |
| SM(d44:5+pO) | 850.7 | 13.38 | 15.36 | 9.79  | 9.79  | 2.63  | 14.75 | 25.91 | 18.25 | 1.15  | Up   | 8.29E-01 |
| SM(d45:6)    | 846.7 | 11.78 | 15.36 | 4.44  | 4.44  | 2.63  | 14.75 | 17.77 | 18.25 | 1.3   | Up   | 4.50E-03 |
| SM(d46:0)    | 872.8 | 28.69 | 34.24 | 7.70  | 7.70  | 16.68 | 30.54 | 34.86 | 35.78 | 1.19  | Up   | 2.62E-02 |
| SM(d46:1)    | 870.8 | 31.50 | 32.21 | 0.79  | 0.79  | 29.52 | 29.30 | 32.48 | 34.76 | 1.02  | Up   | 2.46E-01 |
| SM(d46:2)    | 868.7 | 26.65 | 26.84 | 1.53  | 1.53  | 24.18 | 21.53 | 28.27 | 34.10 | 1.01  | Up   | 1.00E+00 |
| SM(d46:4)    | 864.7 | 14.08 | 15.36 | 7.59  | 7.59  | 2.63  | 14.75 | 20.61 | 18.25 | 1.09  | Up   | 3.40E-01 |
| SM(d46:4+pO) | 880.7 | 8.95  | 15.36 | 7.32  | 7.32  | 2.63  | 14.75 | 21.30 | 18.25 | 1.72  | Up   | 1.46E-01 |
| SM(d46:5+pO) | 878.7 | 13.11 | 15.36 | 9.40  | 9.40  | 2.63  | 14.75 | 24.92 | 18.25 | 1.17  | Up   | 7.82E-01 |
| SM(d46:7+hO) | 874.7 | 14.15 | 15.36 | 8.67  | 8.67  | 2.63  | 14.75 | 25.02 | 18.25 | 1.09  | Up   | 3.72E-01 |
| SM(d47:1)    | 884.8 | 23.79 | 27.14 | 4.77  | 4.77  | 15.27 | 24.13 | 28.25 | 29.82 | 1.14  | Up   | 1.03E-01 |
| SM(d47:7+hO) | 888.7 | 7.33  | 15.36 | 6.17  | 6.17  | 2.63  | 14.75 | 17.48 | 18.25 | 2.1   | Up   | 6.90E-03 |
| SM(d48:0)    | 900.8 | 22.31 | 15.36 | 10.21 | 10.21 | 4.21  | 14.75 | 32.77 | 18.25 | -1.45 | Down | 1.06E-02 |
| SM(d48:1)    | 898.8 | 32.59 | 33.34 | 1.01  | 1.01  | 30.42 | 30.85 | 33.89 | 34.86 | 1.02  | Up   | 1.67E-01 |



|              |       |       |       |      |      |       |       |       |       |       |      |          |
|--------------|-------|-------|-------|------|------|-------|-------|-------|-------|-------|------|----------|
| SM(d48:3+hO) | 910.8 | 8.32  | 15.36 | 7.09 | 7.09 | 2.63  | 14.75 | 18.95 | 18.25 | 1.85  | Up   | 5.92E-02 |
| SM(d48:7+hO) | 902.7 | 14.71 | 15.36 | 8.30 | 8.30 | 2.63  | 14.75 | 24.12 | 18.25 | 1.04  | Up   | 3.72E-01 |
| SM(d49:3)    | 908.8 | 20.89 | 23.84 | 3.87 | 3.87 | 13.74 | 21.59 | 24.71 | 26.48 | 1.14  | Up   | 3.57E-02 |
| SM(d50:0)    | 928.8 | 31.17 | 31.27 | 0.62 | 0.62 | 29.60 | 27.49 | 31.87 | 33.80 | 1     | Up   | 9.75E-01 |
| SM(d50:1)    | 926.8 | 30.49 | 31.04 | 0.52 | 0.52 | 29.76 | 28.65 | 31.37 | 33.89 | 1.02  | Up   | 2.02E-01 |
| SM(d50:1+hO) | 942.8 | 8.25  | 15.36 | 7.07 | 7.07 | 2.63  | 14.75 | 19.54 | 18.25 | 1.86  | Up   | 1.03E-02 |
| SM(d50:3)    | 922.8 | 24.97 | 28.71 | 7.52 | 7.52 | 13.74 | 18.25 | 30.92 | 31.42 | 1.15  | Up   | 6.01E-01 |
| SM(d50:4)    | 920.8 | 28.92 | 28.58 | 0.80 | 0.80 | 26.81 | 18.25 | 29.60 | 32.30 | -1.01 | Down | 8.78E-01 |
| SM(d50:6+pO) | 932.7 | 4.06  | 15.36 | 3.30 | 3.30 | 2.63  | 14.75 | 13.51 | 18.25 | 3.79  | Up   | 1.00E-04 |
| SM(d51:4)    | 934.8 | 22.64 | 15.36 | 1.53 | 1.53 | 19.29 | 14.75 | 24.63 | 18.25 | -1.47 | Down | 1.00E-04 |
| SM(d52:2)    | 952.8 | 29.12 | 29.35 | 0.69 | 0.69 | 28.16 | 25.56 | 30.47 | 31.96 | 1.01  | Up   | 6.75E-01 |
| SM(d52:2+pO) | 968.8 | 22.12 | 23.35 | 0.90 | 0.90 | 20.45 | 15.59 | 24.00 | 26.58 | 1.06  | Up   | 1.06E-02 |
| SM(d53:5)    | 960.8 | 19.22 | 15.36 | 3.00 | 3.00 | 14.88 | 14.75 | 23.33 | 18.25 | -1.25 | Down | 1.10E-03 |
| SM(d54:3+pO) | 994.8 | 13.65 | 15.36 | 8.53 | 8.53 | 2.63  | 14.75 | 23.58 | 18.25 | 1.13  | Up   | 3.72E-01 |
| SM(d56:3)    | 1007  | 15.68 | 15.36 | 6.90 | 6.90 | 2.63  | 14.75 | 23.29 | 18.25 | -1.02 | Down | 2.46E-02 |
| So(d12:0)    | 217.2 | 23.08 | 23.39 | 2.52 | 1.58 | 20.22 | 21.66 | 28.37 | 27.31 | 1.01  | Up   | 7.28E-01 |
| So(d12:0+pO) | 233.2 | 21.54 | 23.33 | 2.30 | 1.53 | 18.25 | 21.68 | 26.82 | 26.82 | 1.08  | Up   | 3.74E-02 |
| So(d13:0+pO) | 247.2 | 21.55 | 22.03 | 3.43 | 4.07 | 17.39 | 15.07 | 27.77 | 29.73 | 1.02  | Up   | 7.63E-01 |
| So(d14:0)    | 245.2 | 25.49 | 24.08 | 3.44 | 2.22 | 20.70 | 22.23 | 31.58 | 30.37 | -1.06 | Down | 3.47E-01 |
| So(d14:0+pO) | 261.2 | 20.44 | 21.67 | 6.19 | 2.94 | 11.23 | 15.15 | 28.95 | 27.87 | 1.06  | Up   | 9.75E-01 |
| So(d14:1)    | 243.2 | 20.38 | 21.83 | 6.22 | 2.97 | 11.03 | 15.15 | 28.92 | 27.88 | 1.07  | Up   | 9.76E-01 |
| So(d14:1+hO) | 259.2 | 15.03 | 15.36 | 5.28 | 0.94 | 2.63  | 14.75 | 22.76 | 18.25 | 1.02  | Up   | 5.25E-01 |
| So(d15:0)    | 259.3 | 20.81 | 24.23 | 2.46 | 2.05 | 18.34 | 21.93 | 26.85 | 28.46 | 1.16  | Up   | 5.00E-04 |
| So(d15:0+pO) | 275.2 | 24.89 | 24.27 | 2.61 | 2.83 | 20.95 | 22.01 | 29.20 | 30.92 | -1.03 | Down | 4.79E-01 |
| So(d16:0)    | 273.3 | 30.53 | 30.05 | 3.47 | 2.03 | 25.98 | 27.44 | 35.26 | 35.39 | -1.02 | Down | 8.78E-01 |
| So(d16:0+pO) | 289.3 | 22.47 | 25.11 | 2.51 | 2.44 | 19.93 | 22.77 | 27.86 | 31.66 | 1.12  | Up   | 1.88E-02 |
| So(d16:1)    | 271.3 | 23.29 | 26.27 | 1.93 | 2.30 | 20.78 | 23.65 | 28.07 | 32.20 | 1.13  | Up   | 3.00E-03 |
| So(d17:0)    | 287.3 | 22.75 | 23.97 | 2.57 | 2.06 | 19.95 | 21.46 | 27.16 | 28.32 | 1.05  | Up   | 1.76E-01 |
| So(d17:0+pO) | 303.3 | 23.07 | 26.21 | 2.32 | 2.82 | 20.98 | 23.09 | 28.27 | 30.51 | 1.14  | Up   | 6.20E-03 |
| So(d17:1)    | 285.3 | 22.99 | 27.19 | 2.14 | 2.54 | 20.01 | 23.77 | 27.23 | 31.03 | 1.18  | Up   | 3.00E-04 |
| So(d18:0)    | 301.3 | 31.68 | 30.48 | 2.84 | 2.10 | 28.42 | 27.35 | 36.45 | 34.38 | -1.04 | Down | 2.60E-01 |
| So(d18:0+pO) | 317.3 | 31.71 | 30.04 | 2.55 | 2.53 | 28.40 | 27.20 | 35.78 | 36.45 | -1.06 | Down | 1.17E-01 |
| So(d18:1)    | 299.3 | 31.56 | 30.64 | 2.60 | 3.12 | 28.63 | 26.53 | 35.58 | 36.45 | -1.03 | Down | 4.55E-01 |
| So(d18:1+hO) | 315.3 | 26.89 | 25.47 | 3.80 | 2.56 | 23.13 | 22.41 | 34.17 | 31.14 | -1.06 | Down | 6.95E-01 |
| So(d18:2)    | 297.3 | 26.88 | 25.44 | 4.26 | 2.48 | 21.61 | 22.95 | 33.89 | 31.62 | -1.06 | Down | 7.40E-01 |
| So(d20:0)    | 329.3 | 27.47 | 27.12 | 3.04 | 2.04 | 24.23 | 24.74 | 32.62 | 31.91 | -1.01 | Down | 7.48E-01 |
| So(d20:0+pO) | 345.3 | 26.02 | 27.30 | 3.28 | 2.88 | 22.47 | 24.58 | 32.02 | 33.89 | 1.05  | Up   | 3.25E-01 |
| So(d20:1)    | 327.3 | 25.32 | 26.97 | 3.70 | 2.84 | 20.90 | 24.27 | 31.83 | 33.46 | 1.07  | Up   | 3.16E-01 |

|                |        |       |       |       |      |       |       |       |       |       |      |          |
|----------------|--------|-------|-------|-------|------|-------|-------|-------|-------|-------|------|----------|
| So(d20:1+hO)   | 343.3  | 21.55 | 24.25 | 0.73  | 1.13 | 20.48 | 23.08 | 22.84 | 27.47 | 1.13  | Up   | 1.00E-04 |
| So(d20:2)      | 325.3  | 17.40 | 22.07 | 6.49  | 1.54 | 4.21  | 20.94 | 27.76 | 26.76 | 1.27  | Up   | 1.16E-02 |
| So(d22:0)      | 357.4  | 26.40 | 27.91 | 3.21  | 4.20 | 21.78 | 22.43 | 31.91 | 33.29 | 1.06  | Up   | 3.49E-01 |
| So(d22:0+pO)   | 373.4  | 28.77 | 26.65 | 2.00  | 2.18 | 25.31 | 23.68 | 32.77 | 32.40 | -1.08 | Down | 6.20E-03 |
| So(d22:1)      | 355.3  | 28.59 | 29.42 | 2.11  | 2.17 | 24.92 | 27.02 | 32.70 | 33.63 | 1.03  | Up   | 3.62E-01 |
| So(d22:1+hO)   | 371.3  | 21.95 | 24.57 | 1.82  | 1.50 | 19.16 | 22.88 | 26.35 | 27.41 | 1.12  | Up   | 1.10E-03 |
| So(d22:2)      | 353.3  | 22.22 | 18.21 | 2.40  | 4.22 | 19.50 | 14.86 | 27.84 | 25.77 | -1.22 | Down | 1.63E-02 |
| So(d24:0)      | 385.4  | 25.48 | 27.83 | 3.82  | 3.05 | 21.04 | 23.17 | 32.08 | 32.48 | 1.09  | Up   | 1.16E-01 |
| So(d24:0+pO)   | 401.4  | 24.00 | 24.45 | 1.85  | 2.06 | 22.20 | 22.76 | 28.50 | 30.47 | 1.02  | Up   | 3.72E-01 |
| So(d25:0)      | 399.4  | 20.43 | 23.29 | 5.22  | 6.53 | 12.36 | 15.00 | 30.54 | 31.45 | 1.14  | Up   | 4.13E-01 |
| So(d25:0+pO)   | 415.4  | 10.20 | 25.37 | 10.94 | 5.15 | 2.63  | 15.11 | 31.30 | 31.87 | 2.49  | Up   | 4.00E-03 |
| SoG1(d12:0)    | 379.26 | 15.62 | 21.35 | 4.24  | 1.19 | 5.89  | 18.25 | 21.36 | 23.03 | 1.37  | Up   | 1.00E-04 |
| SoG1(d15:0)    | 421.30 | 13.64 | 22.41 | 4.89  | 1.21 | 2.63  | 20.95 | 18.39 | 25.27 | 1.64  | Up   | 1.00E-04 |
| SoG1(d16:0)    | 435.32 | 16.10 | 23.23 | 5.62  | 1.32 | 2.63  | 21.51 | 21.20 | 26.07 | 1.44  | Up   | 1.00E-04 |
| SoG1(d16:0+pO) | 451.31 | 29.78 | 29.02 | 0.73  | 2.48 | 29.12 | 26.69 | 31.33 | 35.58 | -1.03 | Down | 6.88E-02 |
| SoG1(d16:1)    | 433.30 | 15.25 | 15.36 | 5.20  | 0.94 | 4.21  | 14.75 | 22.97 | 18.25 | 1.01  | Up   | 5.58E-01 |
| SoG1(d17:0)    | 449.34 | 18.00 | 23.52 | 2.88  | 0.92 | 10.51 | 22.14 | 21.88 | 25.52 | 1.31  | Up   | 1.00E-04 |
| SoG1(d17:1+hO) | 463.31 | 15.22 | 21.61 | 4.93  | 1.25 | 5.89  | 18.25 | 21.02 | 23.00 | 1.42  | Up   | 2.00E-04 |
| SoG1(d18:0+pO) | 479.35 | 19.23 | 23.70 | 2.22  | 1.39 | 15.36 | 22.06 | 22.63 | 26.10 | 1.23  | Up   | 1.00E-04 |
| SoG1(d18:1)    | 461.34 | 21.30 | 24.99 | 0.98  | 1.61 | 19.69 | 22.99 | 22.54 | 27.66 | 1.17  | Up   | 1.00E-04 |
| SoG1(d20:1+hO) | 505.36 | 16.49 | 23.49 | 7.66  | 2.11 | 2.63  | 18.25 | 23.35 | 26.70 | 1.42  | Up   | 1.50E-03 |
| SoG1(d20:2)    | 487.35 | 21.63 | 24.09 | 1.21  | 2.34 | 19.93 | 18.25 | 23.38 | 27.46 | 1.11  | Up   | 5.30E-03 |
| SoG1(d22:1+hO) | 533.39 | 19.09 | 19.19 | 1.54  | 3.21 | 16.99 | 14.75 | 21.97 | 22.32 | 1.01  | Up   | 6.89E-01 |

❖Lipid identification and relative quantification were performed using LipidSearch 4.1 software (Thermo). The search criteria were as follows: product search; parent m/z tolerance 5 ppm; product m/z tolerance 5ppm; quantification: m/z tolerance 5 ppm, retention time tolerance 0.5 min. Cer = Ceramides; SM = sphingomyelins; So = sphingosine; SoG1 = glucosylsphingosine. \* p-values for t-tests and Wilcoxon rank-sum results. Data presented have been log2 transformed.

## **Supplemental Donor Information**

The typical donor information that received followed by receipt of tissue. The diagnosis is usually based on open angle and consecutive static perimetry.

We also consult with attending Ophthalmologist/Physician when possible.

Central 24-2 Threshold Test

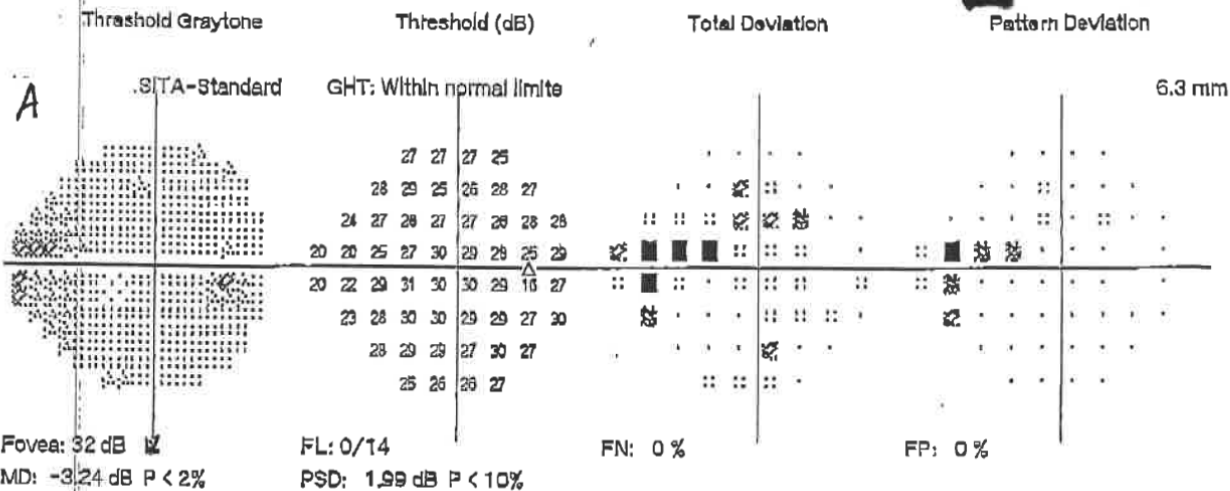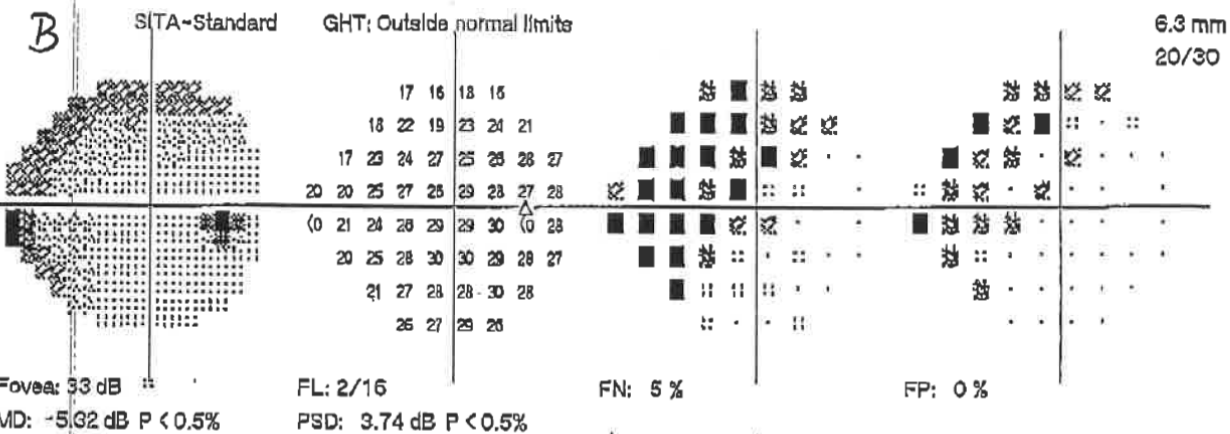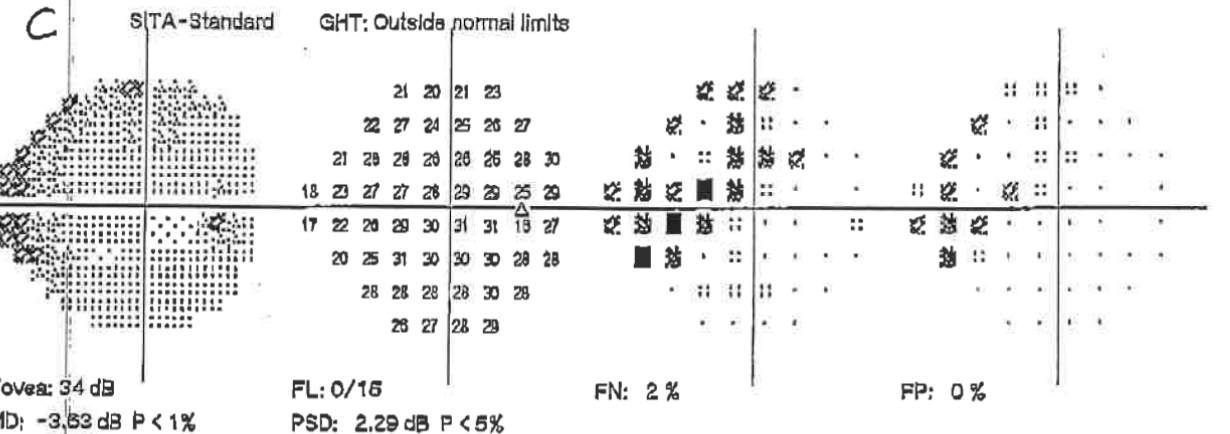

- :: < 5%
- ◐ < 2%
- ◑ < 1%
- < 0.5%

Overview

# ~~XXXX~~

Eye: Right

Central 24-2 Threshold Test

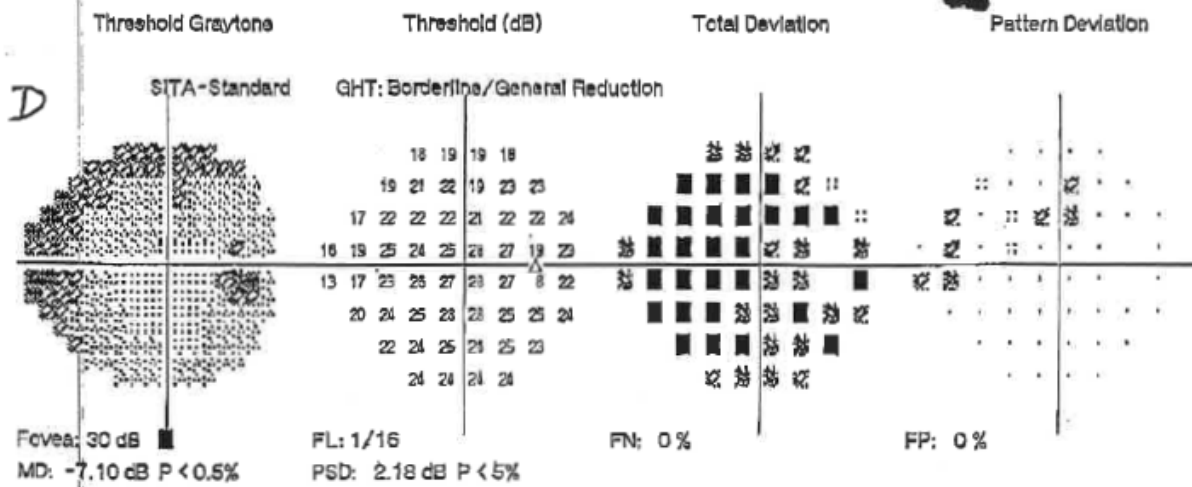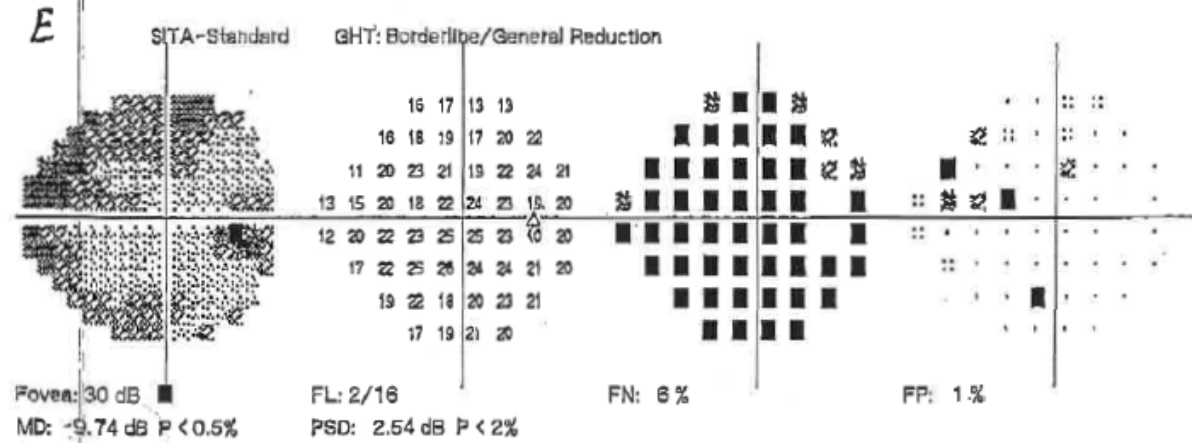

- :: < 5%
- ◐ < 2%
- ◑ < 1%
- < 0.5%

37211

Central 24-2 Threshold Test

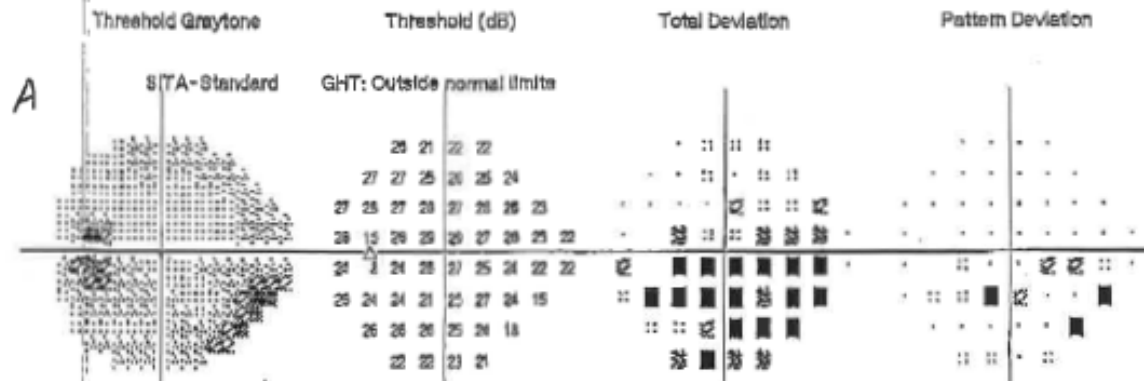

Fovea: 32 dB      FL: 0/15      FN: 0%      FP: 0%  
 MD: -5.12 dB P < 0.5%      PSD: 2.65 dB P < 2%

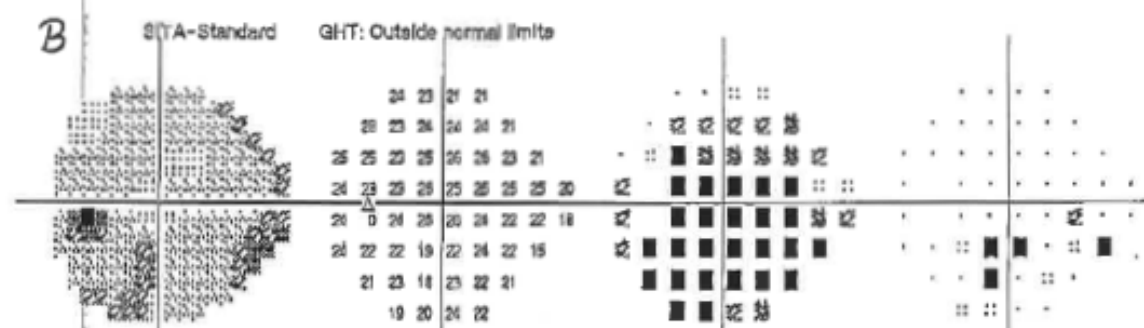

Fovea: 31 dB      FL: 0/17      FN: 6%      FP: 1%  
 MD: -7.07 dB P < 0.5%      PSD: 2.50 dB P < 2%

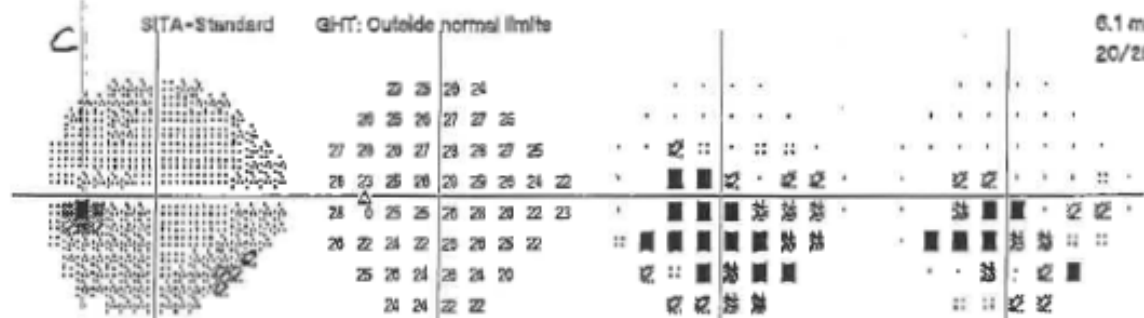

Fovea: 31 dB      FL: 0/15      FN: 0%      FP: 0%  
 MD: -4.51 dB P < 0.5%      PSD: 2.25 dB P < 5%

6.1 mm  
20/25

- :: < 5%
- < 2%
- < 1%
- < 0.5%

Overview

Eye: Left

Central 24-2 Threshold Test

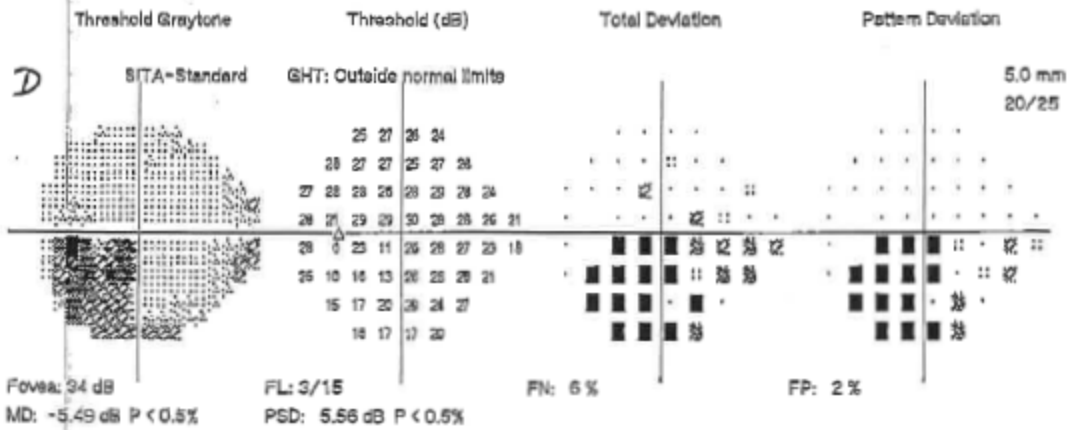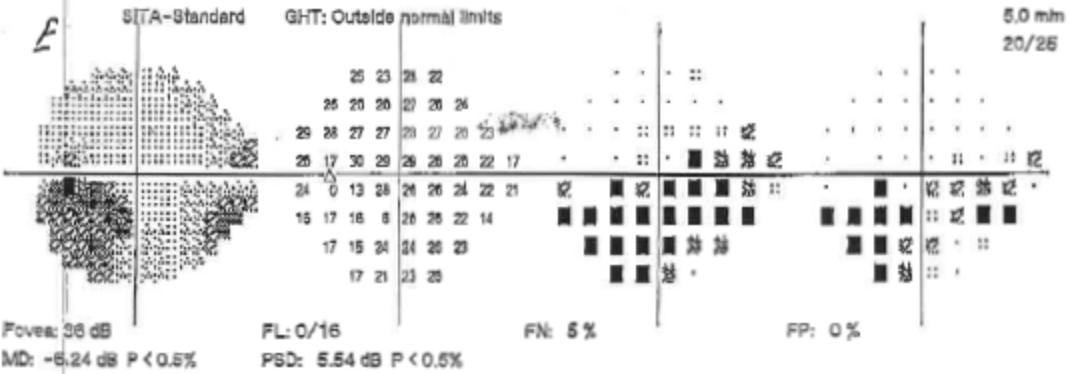

*CR: 0*

- :: < 5%
- ⊗ < 2%
- ⊘ < 1%
- < 0.5%

Overview

Eye: Left

Central 24-2 Threshold Test

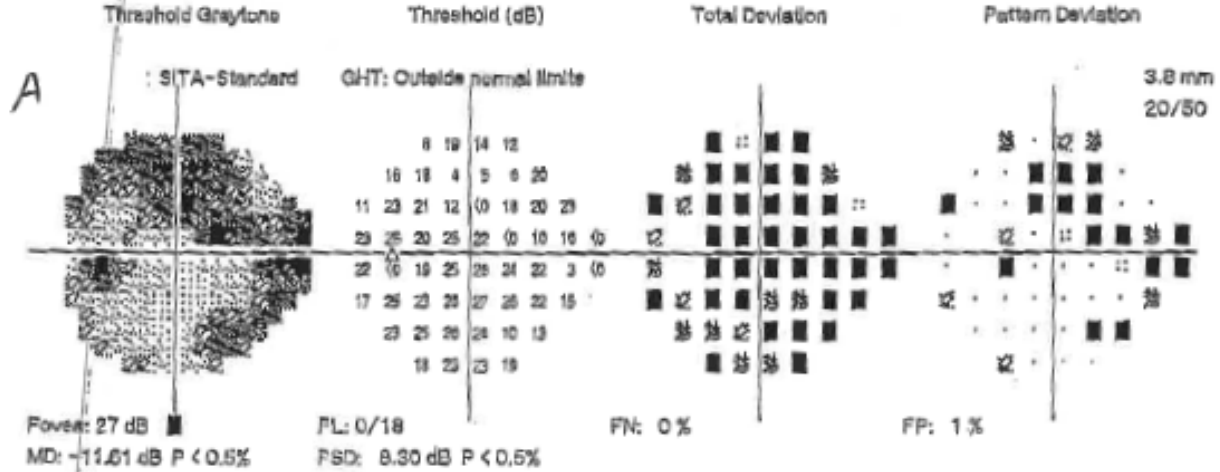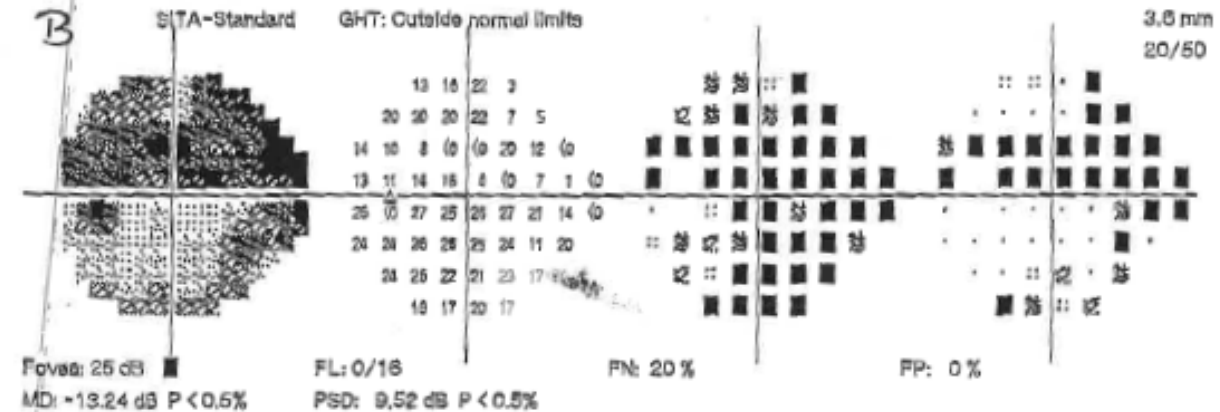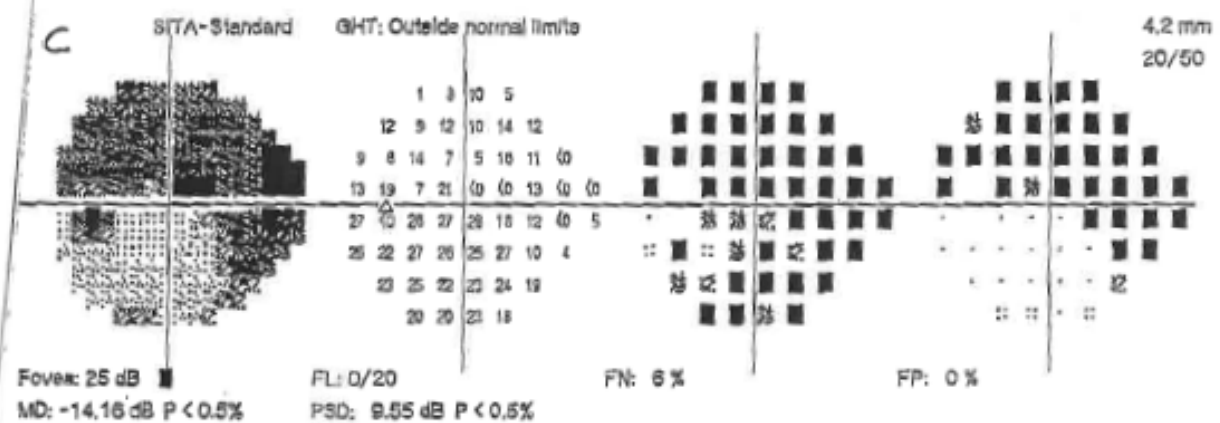

- :: < 5%
- ◐ < 2%
- ◑ < 1%
- < 0.5%



Overview

Fve; Left

Central 24-2 Threshold Test

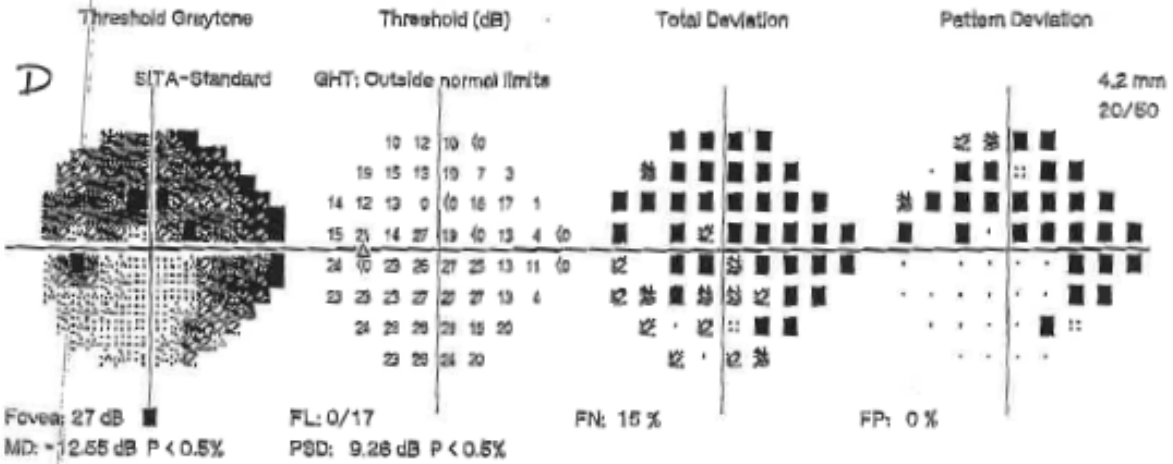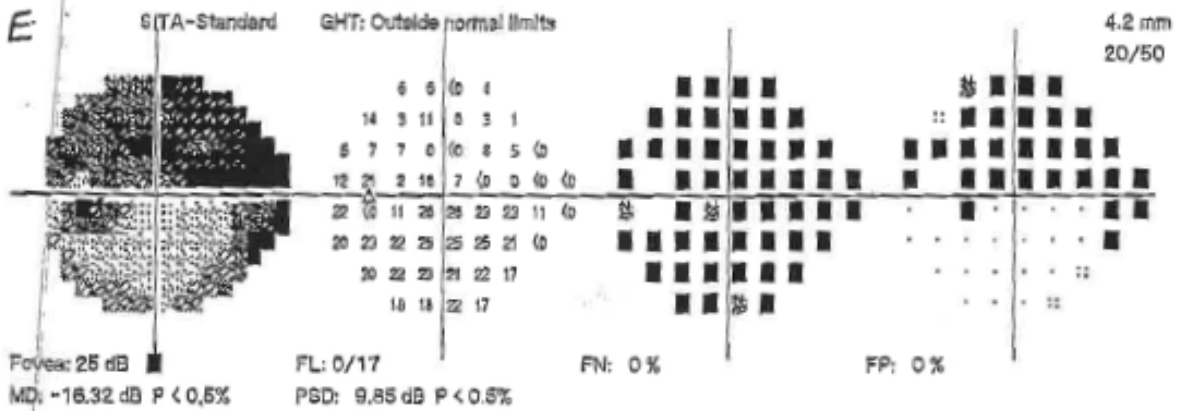

∴ < 5%

⊗ < 2%

⊗ < 1%

■ < 0.5%

PKAM SHEET  
Patient: [Redacted] Accl. Name: [Redacted] Birthdate: [Redacted] Jim. Ph: [Redacted]

Interview Sheets Comments: [Redacted]

Date: 12-24-17

CC: Blurred vision, Debut pain

Family Present: Y or (N)

Name: [Redacted]

Address: [Redacted]

Phone: [Redacted]

POA: Y or N

Med. Class. (Diabetes, HBP, SE, MDD, HIV, Stroke, Service Request, Out Clinic)

Broken

| Ref. by                | Med. A | Med. B | Med. C | Med. D | Med. E |
|------------------------|--------|--------|--------|--------|--------|
| Internal A, B, C, D, E |        |        |        |        |        |
| Antib:                 |        |        |        |        |        |
| Other:                 |        |        |        |        |        |

R X L X

2-1 def. bluish  
Lids  
Cornea

AC

Iris  
Lens  
Vitreous

cup 3/3  
Disc/Rim

Color /  
Contour /

Macula  
notched

Open 360° pigment

AV Vessels

Grade I htr act 21

AMPP

change on

choreoretina

scot

equatorial lesion

No Anomalies to the CRA

Assessment/Dx: (1) PCVOT 7U  
(2) Bilateral 7U  
(3) choroidal swelling 0.2  
(4) equatorial lesion 4  
(5) htr with myopia 21  
Plan: Select IFA 1728 and order when eligible. Tighten her for eye. R.T. 1 year full

Plan: Orders for nursing staff

PE 1 2 3 4 5 6 7 8 9 10 11 12 13 14
